# Supplementary material for: Retrotransposons and the Evolution of Genome Size in Pisum
Source: BioTech (Basel). 2020 Nov 26;9(4):24. doi: 10.3390/biotech9040024 (PMC9258317; doi:10.3390/biotech9040024)
Supplement: Supplementary file 1 [file biotech-09-00024-s001.xlsx]

## Sheet: Table S1 PDR1 SSAPs
	africa	P. sativum	P. sativum	P. sativum	africa	P. sativum	P. sativum	africa	transcaucasicum	cennia P. sativum	asiatic	P. sativum	P. jomardii	asiatic	asiatic	asiatic	africa	asiatic	asiatic	P. sativum	transcaucasicum	asiatic	asiatic	asiatic	odd	asiatic	P. elatius (odd)	asiatic	P. elatius (odd)	P. humile	P. elatius (gp2)	P. elatius (gp1)	P. elatius (gp2)	P. elatius (gp2)	P. elatius (odd)	P. elatius (gp1)	P. elatius (gp1)	P. elatius (gp1)	P. elatius (gp2)	P. fulvum	P. fulvum	P. fulvum	P. fulvum	P. abyssinicum
	JI156	JI209	JI201	JI52	JI185	JI1030	JI284	JI189	JI2546	JI399	JI804	JI1846	JI250	JI95	JI102	JI1428	JI281	JI109	JI1346	JI2713	JI45	JI181	JI1854	JI85	JI1089	JI241	JI2201	JI2545	JI199	JI1794	JI1074	JI1096	JI64	JI262	JI261	JI1093	JI2055	JI1092	JI254	JI224	JI1006	JI1010	JI1796	JI225			occupied site allele frequency
PDR1p_0007	0	0	0	0	0	0	0	0	0	0	0	0	0	0	0	0	0	0	0	0	0	0	0	0	0	0	0	0	0	0	0	0	0	0	0	0	0	0	0	0	0	0	0	1		PDR1	0.0227273		PDR1
PDR1p_0037	0	1	0	0	0	0	0	0	0	0	0	0	0	0	0	0	0	0	0	0	0	0	0	0	0	0	0	0	0	0	0	0	0	0	0	0	0	0	0	0	0	0	0	0			0.0227273		p(occupied)
PDR1p_0045	0	0	0	0	0	0	0	0	0	0	0	0	0	0	0	0	0	0	0	0	0	0	0	0	0	0	0	0	0	0	0	0	0	0	0	0	0	0	1	0	0	0	0	0			0.0227273		q(empty)
PDR1p_0048	0	0	0	0	0	0	0	0	0	0	0	0	0	0	0	0	0	0	0	0	0	0	0	0	0	0	0	0	0	0	0	0	0	0	0	0	0	0	0	0	0	0	0	1			0.0227273		H(sub)e
PDR1p_0058	0	0	0	0	0	0	0	0	0	0	0	0	0	0	0	0	0	0	0	0	0	0	0	0	0	0	0	0	0	0	0	0	0	0	1	0	0	0	0	0	0	0	0	0			0.0227273		4Neν
PDR1p_0067	0	0	0	0	0	0	0	0	0	0	0	0	0	0	0	0	0	0	0	0	0	0	0	0	0	0	0	0	0	0	0	0	0	0	0	0	0	0	0	0	0	0	0	1			0.0227273
PDR1p_0068	0	0	0	0	0	0	0	0	0	0	0	0	0	0	0	0	0	0	0	0	0	0	0	0	0	0	0	0	0	0	0	0	0	0	0	0	0	0	0	1	0	0	0	0			0.0227273
PDR1p_0072	0	0	0	0	0	0	0	0	0	0	0	0	0	0	0	0	0	0	0	0	0	0	0	0	0	0	0	0	0	1	0	0	0	0	0	0	0	0	0	0	0	0	0	0			0.0227273
PDR1p_0103	0	0	0	0	0	0	0	0	0	0	0	0	0	0	0	0	0	0	0	0	0	0	0	0	0	0	0	0	0	1	0	0	0	0	0	0	0	0	0	0	0	0	0	0			0.0227273
PDR1p_0106	0	0	0	0	0	0	0	0	0	0	0	0	0	0	0	0	0	0	0	0	0	0	0	0	0	0	0	0	0	0	0	0	0	0	0	0	0	0	0	1	0	0	0	0			0.0227273
PDR1p_0109	0	0	0	0	0	0	0	0	0	0	0	0	0	0	0	0	0	0	0	0	0	0	0	0	0	0	0	0	0	0	0	0	0	0	0	0	0	0	0	0	1	0	0	0			0.0227273
PDR1p_0112	0	0	0	0	0	0	0	0	0	0	0	0	0	0	0	0	0	0	0	0	0	0	0	0	1	0	0	0	0	0	0	0	0	0	0	0	0	0	0	0	0	0	0	0			0.0227273
PDR1p_0117	0	0	0	0	0	0	0	0	0	0	0	0	0	0	0	0	0	0	0	0	0	0	0	0	0	0	0	0	0	0	0	0	0	0	0	1	0	0	0	0	0	0	0	0			0.0227273
PDR1p_0120	0	0	0	0	0	0	0	0	0	0	0	0	0	0	0	0	0	0	0	0	0	0	0	0	0	0	0	0	0	0	0	0	0	0	1	0	0	0	0	0	0	0	0	0			0.0227273
PDR1p_0122	0	0	0	1	0	0	0	0	0	0	0	0	0	0	0	0	0	0	0	0	0	0	0	0	0	0	0	0	0	0	0	0	0	0	0	0	0	0	0	0	0	0	0	0			0.0227273
PDR1p_0135	0	0	0	0	0	0	0	0	0	0	0	0	0	0	0	0	0	0	0	0	0	0	0	0	0	0	0	0	0	0	0	0	0	0	0	0	0	0	1	0	0	0	0	0			0.0227273
PDR1p_0158	0	0	0	0	0	0	0	0	0	0	0	0	0	0	0	0	0	0	0	0	0	0	0	0	0	0	0	0	0	0	0	0	0	0	0	0	0	0	0	0	0	0	0	1			0.0227273
PDR1p_0191	0	0	0	0	0	0	0	0	0	0	0	0	0	0	0	0	0	0	0	0	0	0	0	0	0	0	0	0	0	0	0	0	0	0	0	0	0	0	0	0	0	0	0	1			0.0227273
PDR1p_0194	0	0	0	0	0	0	0	0	0	0	0	0	0	0	0	0	0	0	0	0	0	0	0	0	0	0	0	0	0	0	0	0	0	0	0	0	0	0	0	1	0	0	0	0			0.0227273
PDR1p_0199	0	0	0	0	0	0	0	0	0	0	0	0	0	0	0	0	0	0	0	0	0	0	0	0	0	0	0	0	0	0	0	0	0	0	0	0	0	0	0	0	0	0	0	1			0.0227273
PDR1p_0255	0	0	0	0	0	0	0	0	0	0	0	0	0	0	0	0	0	0	0	0	0	0	0	0	0	0	0	0	0	0	0	0	0	0	0	0	0	0	0	1	0	0	0	0			0.0227273
PDR1p_0256	0	0	0	0	0	0	0	0	0	0	0	0	0	0	0	0	0	0	0	0	0	0	0	0	0	0	0	0	0	0	0	0	0	0	1	0	0	0	0	0	0	0	0	0			0.0227273
PDR1p_0270	0	0	0	0	0	0	0	0	0	0	0	0	0	0	0	0	0	0	0	0	0	0	0	0	0	0	0	0	0	0	0	0	0	0	0	0	0	0	1	0	0	0	0	0			0.0227273
PDR1p_0274	0	0	0	0	0	0	0	0	0	0	0	0	0	0	0	0	0	0	0	0	0	0	0	0	0	0	0	0	0	0	0	0	0	0	0	0	0	0	0	0	0	0	1	0			0.0227273
PDR1p_0031	0	0	0	0	0	0	0	0	0	0	0	0	0	0	0	0	0	0	0	0	0	0	0	0	0	0	0	0	0	0	0	0	0	0	0	0	0	0	0	1	0	0	0	0			0.0227273
PDR1p_0010	0	0	0	0	0	0	0	0	0	0	0	0	0	0	0	0	0	0	0	0	0	0	0	0	0	0	0	0	0	0	0	0	0	0	0	0	0	0	0	1	0	0	0	1			0.0454545
PDR1p_0042	0	0	0	0	0	0	0	0	0	0	0	0	0	0	0	0	0	0	0	0	0	0	0	0	0	0	0	0	0	0	0	0	0	0	0	0	0	0	0	0	0	1	0	1			0.0454545
PDR1p_0055	0	0	0	0	0	0	0	0	0	0	0	0	0	0	0	0	0	0	0	0	0	0	1	0	0	0	0	0	0	0	0	0	0	0	1	0	0	0	0	0	0	0	0	0			0.0454545
PDR1p_0089	0	0	0	0	0	0	0	0	0	0	0	0	0	0	0	0	0	0	0	0	1	0	0	0	0	0	0	0	0	0	0	0	0	0	0	0	0	0	0	0	1	0	0	0			0.0454545
PDR1p_0097	0	0	0	0	0	0	0	0	0	0	0	0	0	0	0	0	0	0	0	0	0	0	0	0	0	0	0	0	0	0	0	0	0	0	0	0	0	0	0	1	1	0	0	0			0.0454545
PDR1p_0100	0	0	0	0	0	0	0	0	0	0	0	0	0	0	0	0	0	0	0	0	0	0	0	0	0	0	0	0	0	0	0	0	0	0	0	1	0	0	0	0	0	0	0	1			0.0454545
PDR1p_0104	0	0	0	1	0	0	0	0	0	0	0	0	1	0	0	0	0	0	0	0	0	0	0	0	0	0	0	0	0	0	0	0	0	0	0	0	0	0	0	0	0	0	0	0			0.0454545
PDR1p_0105	0	0	0	0	0	0	0	0	0	0	0	0	0	0	0	0	0	0	0	0	0	0	0	0	0	0	0	0	0	0	0	0	0	0	0	0	0	0	0	1	1	0	0	0			0.0454545
PDR1p_0114	0	0	0	0	0	0	0	0	0	0	0	0	0	0	0	0	0	0	0	0	1	0	1	0	0	0	0	0	0	0	0	0	0	0	0	0	0	0	0	0	0	0	0	0			0.0454545
PDR1p_0118	0	0	0	0	0	0	0	0	0	0	0	0	0	1	0	0	0	0	0	0	0	0	0	0	0	0	0	0	0	0	0	0	0	0	0	0	0	0	0	0	0	1	0	0			0.0454545
PDR1p_0127	0	0	0	0	0	0	0	0	0	0	0	0	0	0	0	0	0	0	0	0	0	0	0	0	1	0	0	0	0	0	0	0	0	0	0	0	0	0	1	0	0	0	0	0			0.0454545
PDR1p_0133	0	0	0	0	0	0	0	0	0	0	0	0	0	0	0	0	0	0	0	0	0	0	0	0	0	0	0	0	0	0	0	0	0	0	1	0	0	0	0	0	0	0	0	1			0.0454545
PDR1p_0136	0	0	0	0	0	1	0	0	0	0	0	0	0	0	0	0	0	0	0	0	0	0	0	0	0	0	0	0	0	0	0	0	0	0	0	0	0	0	0	0	1	0	0	0			0.0454545
PDR1p_0155	0	0	0	0	0	0	0	0	0	0	0	0	0	0	0	0	0	0	0	0	0	0	0	0	0	0	0	0	0	0	1	0	0	1	0	0	0	0	0	0	0	0	0	0			0.0454545
PDR1p_0157	0	0	1	0	0	1	0	0	0	0	0	0	0	0	0	0	0	0	0	0	0	0	0	0	0	0	0	0	0	0	0	0	0	0	0	0	0	0	0	0	0	0	0	0			0.0454545
PDR1p_0176	0	0	0	0	0	0	0	0	1	0	0	0	0	0	0	0	0	0	0	0	0	0	0	0	0	0	0	0	0	0	0	0	0	0	0	0	0	0	0	0	0	0	0	1			0.0454545
PDR1p_0183	0	0	1	0	0	0	0	0	0	0	0	0	0	0	0	0	0	0	0	0	1	0	0	0	0	0	0	0	0	0	0	0	0	0	0	0	0	0	0	0	0	0	0	0			0.0454545
PDR1p_0187	0	0	0	0	0	0	0	0	0	0	0	0	0	0	0	0	0	0	0	0	0	0	0	0	0	0	0	0	0	0	0	0	0	0	0	0	0	0	0	1	1	0	0	0			0.0454545
PDR1p_0188	0	0	0	0	0	0	0	0	0	1	0	0	0	0	0	0	0	0	0	0	0	0	0	0	0	0	0	0	0	0	0	0	0	0	0	0	0	0	0	0	0	0	1	0			0.0454545
PDR1p_0189	0	0	0	0	0	0	0	0	0	0	0	0	0	0	0	0	0	0	0	0	0	0	0	0	0	0	0	0	0	0	0	0	0	0	0	0	0	1	0	0	0	0	0	1			0.0454545
PDR1p_0196	0	0	0	0	0	0	0	0	0	0	0	0	0	0	0	0	0	0	0	1	0	0	0	0	0	0	0	0	0	0	0	0	0	0	0	0	0	0	0	0	1	0	0	0			0.0454545
PDR1p_0200	0	0	0	0	0	0	1	0	0	0	0	0	0	0	0	0	0	0	0	0	0	0	0	0	0	0	1	0	0	0	0	0	0	0	0	0	0	0	0	0	0	0	0	0			0.0454545
PDR1p_0203	0	0	0	0	0	0	0	0	0	0	0	0	0	0	0	0	0	0	0	0	0	0	0	0	0	0	0	0	0	1	0	0	0	0	0	0	0	0	0	0	0	0	0	1			0.0454545
PDR1p_0250	0	0	0	0	0	0	0	0	0	0	0	0	0	0	0	0	0	0	0	0	0	0	0	0	0	0	0	0	0	0	1	0	0	1	0	0	0	0	0	0	0	0	0	0			0.0454545
PDR1p_0253	0	0	0	0	0	0	0	0	0	0	0	0	0	0	0	0	0	0	0	0	0	0	0	0	0	0	0	0	0	0	0	0	0	0	0	0	0	0	0	1	1	0	0	0			0.0454545
PDR1p_0260	0	0	1	0	0	0	0	0	0	0	0	0	0	0	0	0	0	0	0	0	0	0	0	0	0	0	1	0	0	0	0	0	0	0	0	0	0	0	0	0	0	0	0	0			0.0454545
PDR1p_0266	0	0	0	0	0	0	0	0	0	0	0	0	0	0	0	0	0	0	0	0	0	0	0	0	0	0	0	0	0	1	0	0	0	0	0	0	0	0	0	1	0	0	0	0			0.0454545
PDR1p_0267	0	0	0	0	0	0	0	0	0	0	0	0	0	0	0	0	0	0	0	0	0	0	0	0	0	0	0	0	0	0	0	0	0	0	0	0	0	0	0	1	0	1	0	0			0.0454545
PDR1p_0271	0	0	0	0	0	0	0	0	0	0	0	0	0	0	0	0	0	0	0	0	0	0	0	0	0	0	0	0	0	0	1	0	0	1	0	0	0	0	0	0	0	0	0	0			0.0454545
PDR1p_0277	0	0	0	0	0	0	0	0	0	0	0	0	0	0	0	0	0	0	0	0	0	0	0	0	0	0	0	0	0	0	0	0	0	0	0	0	0	0	0	0	1	0	1	0			0.0454545
PDR1p_0003	0	0	0	0	0	0	0	0	0	0	1	0	0	0	0	0	0	0	0	1	0	0	0	0	0	0	0	0	0	0	0	0	0	0	0	0	0	0	0	0	1	0	0	0			0.0681818
PDR1p_0014	0	0	0	0	0	0	0	0	0	0	0	0	0	0	0	0	0	0	0	0	0	0	0	0	0	0	0	0	0	0	0	0	0	1	0	0	1	0	0	0	0	1	0	0			0.0681818
PDR1p_0018	0	0	0	0	0	0	0	0	0	0	0	0	0	0	0	0	0	0	0	0	0	0	0	0	0	0	0	0	0	0	0	0	0	0	0	0	0	0	0	0	0	1	1	1			0.0681818
PDR1p_0051	0	0	0	0	0	0	0	0	0	0	0	0	0	0	0	0	0	0	0	0	0	0	0	0	0	0	0	0	0	1	0	0	0	0	1	0	0	0	0	0	0	0	1	0			0.0681818
PDR1p_0060	0	0	0	0	0	0	0	0	0	0	0	0	0	0	0	0	0	0	0	0	0	0	0	0	0	0	0	0	0	0	0	0	1	1	0	0	0	0	1	0	0	0	0	0			0.0681818
PDR1p_0064	0	0	0	0	0	1	0	0	0	0	0	0	1	0	0	0	0	0	0	0	0	0	0	0	0	0	0	0	0	0	0	0	0	1	0	0	0	0	0	0	0	0	0	0			0.0681818
PDR1p_0065	0	0	0	0	0	0	0	0	1	0	0	0	0	0	0	0	0	0	0	0	1	0	0	0	0	0	1	0	0	0	0	0	0	0	0	0	0	0	0	0	0	0	0	0			0.0681818
PDR1p_0091	0	0	0	0	0	0	0	0	0	0	0	0	1	0	0	0	0	0	0	0	1	0	0	0	0	0	0	0	0	0	0	0	0	0	0	0	0	0	0	0	1	0	0	0			0.0681818
PDR1p_0099	0	1	0	0	0	1	0	0	0	0	0	0	0	0	0	0	0	0	0	0	0	0	0	0	0	0	1	0	0	0	0	0	0	0	0	0	0	0	0	0	0	0	0	0			0.0681818
PDR1p_0110	0	0	0	0	0	0	0	0	0	0	0	0	0	0	0	0	0	0	0	0	0	0	0	0	0	0	0	0	0	0	0	1	0	0	0	1	0	1	0	0	0	0	0	0			0.0681818
PDR1p_0115	0	0	0	0	0	0	0	1	0	0	0	0	0	0	0	0	0	0	0	0	0	0	0	0	0	0	0	0	0	0	1	0	0	0	1	0	0	0	0	0	0	0	0	0			0.0681818
PDR1p_0121	0	0	0	0	0	1	0	0	1	0	0	0	0	0	0	0	0	0	0	0	0	0	1	0	0	0	0	0	0	0	0	0	0	0	0	0	0	0	0	0	0	0	0	0			0.0681818
PDR1p_0126	0	0	0	0	0	0	0	0	0	0	0	0	0	0	0	0	0	0	0	0	0	0	0	0	0	0	0	0	0	0	0	0	0	0	0	0	0	0	0	0	1	1	1	0			0.0681818
PDR1p_0129	0	0	0	0	0	0	0	0	0	0	0	0	0	0	0	0	0	0	0	0	0	0	0	0	1	0	0	0	0	0	0	0	0	1	0	0	0	0	1	0	0	0	0	0			0.0681818
PDR1p_0137	0	0	0	0	0	0	0	0	0	0	0	0	0	0	0	0	0	0	0	0	0	0	0	0	0	0	0	0	0	0	0	0	0	0	1	1	0	0	0	0	0	0	0	1			0.0681818
PDR1p_0151	0	0	0	0	0	0	0	0	0	0	0	0	0	0	0	0	0	0	0	0	0	0	0	0	0	0	1	0	0	0	1	0	0	0	0	0	0	0	0	0	1	0	0	0			0.0681818
PDR1p_0167	0	0	0	0	0	0	0	0	0	0	0	0	0	0	0	0	0	0	0	0	0	0	0	0	0	0	0	0	0	0	0	1	0	0	0	1	0	1	0	0	0	0	0	0			0.0681818
PDR1p_0202	0	1	0	0	0	0	0	0	0	0	0	0	0	0	0	0	0	0	0	1	0	0	0	0	0	0	0	0	0	0	0	0	0	0	0	0	0	0	0	1	0	0	0	0			0.0681818
PDR1p_0215	0	0	0	0	0	0	0	0	0	0	0	0	0	0	0	0	0	0	0	0	1	0	0	0	0	0	0	0	0	0	0	0	0	1	0	0	0	1	0	0	0	0	0	0			0.0681818
PDR1p_0221	0	0	0	0	0	0	0	0	0	0	0	0	0	0	0	0	0	0	0	0	0	0	0	0	0	0	0	0	0	0	0	0	0	0	0	0	0	0	1	1	1	0	0	0			0.0681818
PDR1p_0222	0	0	0	0	0	0	0	0	0	0	0	0	0	0	0	0	0	0	0	0	0	0	0	0	0	0	0	0	0	0	0	0	0	0	0	0	0	0	0	1	1	0	1	0			0.0681818
PDR1p_0226	0	0	0	0	0	0	0	0	0	0	0	0	0	1	0	0	0	0	0	0	0	0	0	0	0	0	0	0	0	0	0	0	0	0	0	1	1	0	0	0	0	0	0	0			0.0681818
PDR1p_0233	0	0	0	0	0	0	0	0	0	0	0	0	0	0	0	0	0	0	0	0	0	0	0	0	0	0	0	0	0	0	0	0	0	0	0	1	0	0	1	0	0	0	0	1			0.0681818
PDR1p_0238	0	0	0	0	0	0	0	0	0	0	0	0	0	0	0	0	0	0	0	0	0	0	0	0	0	0	0	0	0	0	0	0	1	0	0	1	1	0	0	0	0	0	0	0			0.0681818
PDR1p_0243	0	0	0	0	0	0	0	0	0	0	0	0	0	0	0	0	0	0	0	0	0	0	0	0	0	0	0	0	0	0	0	0	0	0	1	0	0	0	0	1	1	0	0	0			0.0681818
PDR1p_0244	0	0	0	0	0	0	0	0	0	0	0	0	0	0	0	0	0	0	0	0	0	0	0	0	0	0	0	0	0	0	0	0	0	0	0	1	0	1	0	0	0	0	1	0			0.0681818
PDR1p_0254	0	0	0	0	0	0	0	0	0	0	0	0	0	0	0	0	0	0	0	0	0	0	0	0	0	0	0	0	0	0	0	0	0	0	0	0	0	0	1	1	0	0	0	1			0.0681818
PDR1p_0269	0	0	0	0	0	0	0	0	0	0	0	0	0	0	0	0	0	0	0	1	0	0	0	0	0	0	0	0	0	0	0	0	0	0	0	0	0	0	1	0	0	0	0	1			0.0681818
PDR1p_0273	0	0	0	0	0	0	0	0	0	0	0	0	0	0	0	0	0	0	0	0	0	0	0	0	0	0	0	0	0	0	0	0	0	0	0	0	0	0	0	1	1	1	0	0			0.0681818
PDR1p_0021	0	0	0	0	0	0	0	0	1	0	0	0	0	0	0	0	0	0	0	0	1	0	0	0	1	0	0	0	0	0	0	0	0	1	0	0	0	0	0	0	0	0	0	0			0.0909091
PDR1p_0052	0	0	0	0	0	0	0	0	0	0	0	0	0	0	0	0	0	0	0	0	0	0	0	0	0	0	0	0	0	0	0	0	0	0	0	0	0	0	0	1	1	1	1	0			0.0909091
PDR1p_0061	0	0	0	0	0	0	0	0	0	0	0	0	0	0	0	0	0	0	0	0	0	0	0	0	1	0	0	0	0	1	1	0	0	0	0	0	0	0	0	1	0	0	0	0			0.0909091
PDR1p_0062	0	1	0	0	0	0	0	0	0	0	0	0	0	0	0	0	0	0	0	0	0	0	0	0	0	0	0	0	1	0	0	0	0	0	1	0	0	0	0	0	0	0	0	1			0.0909091
PDR1p_0069	0	1	0	0	0	0	0	0	0	0	0	0	0	0	0	0	0	0	0	0	0	0	0	0	0	0	0	0	1	0	0	0	1	0	0	0	0	0	1	0	0	0	0	0			0.0909091
PDR1p_0070	0	0	0	0	0	0	0	0	0	0	0	0	0	0	0	0	0	0	0	0	0	0	0	0	0	0	0	0	0	0	0	0	0	0	0	0	0	0	0	0	1	1	1	1			0.0909091
PDR1p_0075	0	0	0	0	0	0	0	0	0	0	0	0	0	0	0	0	0	0	0	0	0	0	0	0	0	0	0	0	0	0	0	1	0	0	0	1	1	1	0	0	0	0	0	0			0.0909091
PDR1p_0076	0	0	0	0	0	0	0	0	0	0	0	0	0	0	0	0	0	0	0	0	0	0	0	0	0	0	0	0	0	0	0	1	0	0	0	1	1	1	0	0	0	0	0	0			0.0909091
PDR1p_0078	0	0	0	0	0	0	0	0	0	0	0	0	0	0	0	0	0	0	0	0	1	0	0	0	0	0	0	0	0	0	0	1	0	0	0	0	0	0	0	0	1	0	0	1			0.0909091
PDR1p_0124	0	0	0	0	0	1	0	0	1	0	0	0	0	0	0	0	0	0	0	0	0	0	0	0	0	0	0	0	0	1	0	0	0	0	0	0	0	0	0	0	1	0	0	0			0.0909091
PDR1p_0149	0	0	0	0	0	0	0	1	0	0	0	0	0	0	0	0	1	0	0	0	0	0	0	0	1	0	0	0	0	0	0	0	0	0	0	1	0	0	0	0	0	0	0	0			0.0909091
PDR1p_0166	0	0	0	0	0	0	0	0	0	0	0	0	0	0	0	0	0	0	0	0	0	0	0	0	0	0	0	0	0	0	0	1	0	0	0	1	0	1	0	0	1	0	0	0			0.0909091
PDR1p_0169	0	1	0	0	0	0	0	0	0	0	0	0	0	0	0	0	0	0	0	0	0	0	0	0	0	0	0	0	1	0	0	0	0	0	1	0	0	0	0	0	0	0	0	1			0.0909091
PDR1p_0190	0	0	0	0	0	0	0	0	0	0	0	0	0	0	0	0	0	0	0	0	0	0	0	0	0	0	1	0	0	0	1	0	0	1	0	0	0	0	1	0	0	0	0	0			0.0909091
PDR1p_0193	0	0	0	0	0	0	0	0	0	0	0	0	0	0	0	0	0	0	0	0	0	0	0	0	0	0	0	0	0	0	0	0	0	0	0	0	0	0	0	1	1	1	1	0			0.0909091
PDR1p_0219	0	0	0	0	0	0	0	0	0	0	0	0	1	0	0	0	0	0	0	0	0	0	0	0	1	0	1	0	0	0	0	0	0	0	0	0	0	0	0	0	1	0	0	0			0.0909091
PDR1p_0237	0	0	0	0	0	0	0	0	0	0	0	0	0	0	0	0	0	0	0	0	0	0	0	0	0	0	0	0	0	0	0	0	0	0	0	0	0	0	0	1	1	1	1	0			0.0909091
PDR1p_0239	0	0	0	0	0	0	0	0	1	0	0	0	0	0	0	0	0	0	0	0	0	0	0	0	0	0	0	0	0	0	0	0	0	1	0	0	0	0	1	0	0	0	0	1			0.0909091
PDR1p_0247	0	0	0	0	0	0	0	0	0	0	0	0	0	0	0	0	0	0	0	0	0	0	0	0	0	0	0	0	0	1	1	0	0	1	1	0	0	0	0	0	0	0	0	0			0.0909091
PDR1p_0251	0	0	0	0	0	0	0	0	0	0	0	0	0	0	1	0	0	0	0	0	0	0	0	0	0	0	1	0	0	0	0	0	0	0	0	0	0	0	0	0	1	0	1	0			0.0909091
PDR1p_0272	0	0	0	0	0	0	0	0	0	0	0	0	0	0	0	0	0	0	0	0	0	0	0	0	0	0	0	0	0	0	0	0	0	0	0	0	0	0	0	1	1	1	1	0			0.0909091
PDR1p_0279	0	0	0	0	0	0	0	0	0	1	0	0	0	0	0	0	0	0	0	0	0	1	0	0	0	0	0	0	0	0	0	0	0	0	0	0	0	0	0	0	1	0	1	0			0.0909091
PDR1p_0280	0	0	0	0	0	0	0	0	0	0	0	0	0	0	0	0	0	0	0	0	0	0	0	0	0	0	1	0	1	0	0	0	0	1	0	0	0	1	0	0	0	0	0	0			0.0909091
PDR1p_0012	0	0	0	0	0	0	0	0	0	0	0	0	0	0	0	0	0	0	0	0	0	0	0	0	0	0	0	0	0	1	0	0	0	0	1	0	0	0	0	1	0	1	1	0			0.113636
PDR1p_0071	0	0	0	0	0	0	0	0	0	0	1	0	0	1	1	1	0	0	0	1	0	0	0	0	0	0	0	0	0	0	0	0	0	0	0	0	0	0	0	0	0	0	0	0			0.113636
PDR1p_0093	0	0	1	0	0	0	0	0	0	0	0	0	0	0	0	0	0	0	0	1	0	0	0	0	0	0	0	0	0	0	0	0	0	1	0	0	0	0	0	1	1	0	0	0			0.113636
PDR1p_0095	0	0	0	0	0	0	0	0	0	0	0	0	0	0	0	0	0	0	0	0	0	0	0	0	0	0	0	0	0	0	0	0	1	0	0	0	0	0	1	0	1	1	0	1			0.113636
PDR1p_0107	0	0	0	0	0	0	0	0	0	0	0	0	0	0	0	0	0	0	0	0	0	0	0	0	1	0	0	0	1	0	1	0	0	0	1	0	0	0	0	0	1	0	0	0			0.113636
PDR1p_0123	1	0	0	0	0	0	0	1	0	0	0	0	0	0	0	0	1	0	0	0	0	0	0	0	0	0	0	0	0	0	0	0	0	0	1	1	0	0	0	0	0	0	0	0			0.113636
PDR1p_0139	0	1	0	0	0	0	0	0	0	1	1	0	0	0	0	0	0	0	0	0	0	0	0	1	0	0	1	0	0	0	0	0	0	0	0	0	0	0	0	0	0	0	0	0			0.113636
PDR1p_0186	0	0	0	0	0	0	0	0	1	0	0	0	0	0	0	0	0	0	0	0	1	0	0	0	0	0	0	0	0	0	0	0	0	0	0	0	0	0	0	1	0	1	0	1			0.113636
PDR1p_0198	0	1	0	0	0	0	1	0	0	0	1	1	0	0	0	0	0	0	0	1	0	0	0	0	0	0	0	0	0	0	0	0	0	0	0	0	0	0	0	0	0	0	0	0			0.113636
PDR1p_0204	0	0	0	0	0	0	0	0	0	0	0	1	0	0	0	0	0	0	0	0	0	0	0	0	1	1	0	1	0	0	0	0	0	0	0	0	0	0	0	0	0	1	0	0			0.113636
PDR1p_0209	0	0	0	0	0	0	0	0	0	0	0	0	0	0	0	0	0	0	0	0	0	0	0	0	1	0	0	0	0	0	0	0	0	1	0	0	0	0	0	1	1	1	0	0			0.113636
PDR1p_0225	1	0	0	0	0	0	0	0	0	0	0	1	1	0	0	0	0	1	0	0	0	0	0	0	1	0	0	0	0	0	0	0	0	0	0	0	0	0	0	0	0	0	0	0			0.113636
PDR1p_0245	0	0	0	0	0	0	0	0	0	0	0	0	0	1	0	1	0	0	0	0	0	0	0	0	0	0	0	0	0	1	0	0	0	0	0	0	0	0	0	1	1	0	0	0			0.113636
PDR1p_0258	0	1	0	0	1	0	0	1	0	0	0	0	0	0	0	0	1	0	0	0	0	0	0	0	0	0	0	0	0	0	0	1	0	0	0	0	0	0	0	0	0	0	0	0			0.113636
PDR1p_0264	0	0	0	0	0	0	0	0	0	0	0	0	0	0	0	0	0	0	0	0	0	0	0	0	0	0	0	0	0	0	0	0	1	0	0	0	0	0	0	1	1	1	1	0			0.113636
PDR1p_0043	0	0	0	0	0	0	0	0	0	0	1	0	0	0	0	1	0	0	0	0	0	0	0	1	0	1	0	0	0	0	0	0	0	0	0	0	0	0	0	0	0	1	0	1			0.136364
PDR1p_0053	0	0	0	0	0	0	0	0	0	1	0	0	0	0	0	0	0	0	0	0	1	0	0	0	0	0	0	0	0	0	0	0	1	0	0	0	0	0	0	1	1	0	1	0			0.136364
PDR1p_0082	1	1	0	0	1	1	0	0	0	0	0	1	0	0	0	0	0	0	0	1	0	0	0	0	0	0	0	0	0	0	0	0	0	0	0	0	0	0	0	0	0	0	0	0			0.136364
PDR1p_0128	1	0	0	1	0	1	0	0	1	0	0	0	0	0	0	0	1	0	0	0	0	0	0	0	0	0	0	0	0	0	0	0	0	1	0	0	0	0	0	0	0	0	0	0			0.136364
PDR1p_0161	0	0	0	0	0	1	0	0	0	0	0	0	0	0	0	0	0	1	0	0	0	0	0	0	0	0	0	0	0	0	0	0	1	0	0	0	0	0	1	1	0	0	1	0			0.136364
PDR1p_0177	1	0	0	0	0	0	0	1	0	0	0	0	1	0	0	0	1	0	1	0	0	0	0	0	1	0	0	0	0	0	0	0	0	0	0	0	0	0	0	0	0	0	0	0			0.136364
PDR1p_0180	0	0	0	0	1	0	0	1	0	0	0	0	1	0	0	0	1	0	0	0	0	0	0	0	0	0	0	0	0	1	0	0	0	0	0	0	0	0	0	0	0	0	0	1			0.136364
PDR1p_0206	0	0	0	0	0	0	0	0	0	0	1	0	0	0	0	0	0	0	0	1	0	0	0	0	0	0	0	0	0	0	0	0	0	1	0	0	1	1	0	0	0	0	1	0			0.136364
PDR1p_0229	0	0	0	0	0	0	0	0	0	0	0	0	0	0	1	0	0	1	0	0	1	0	0	0	0	0	0	0	0	1	0	0	0	0	1	1	0	0	0	0	0	0	0	0			0.136364
PDR1p_0232	0	0	0	0	0	0	0	1	0	0	0	0	0	0	0	0	1	1	0	0	0	0	0	0	1	0	0	0	0	0	0	0	0	1	0	0	0	1	0	0	0	0	0	0			0.136364
PDR1p_0019	0	0	0	0	0	0	0	0	0	0	0	0	0	0	0	0	0	0	0	0	0	0	0	0	0	0	0	0	1	1	0	1	0	0	1	1	1	1	0	0	0	0	0	0			0.159091
PDR1p_0044	0	0	1	0	0	0	1	0	0	0	1	0	0	0	0	0	0	0	0	0	0	0	0	0	0	0	0	0	0	0	1	0	1	1	0	0	0	0	1	0	0	0	0	0			0.159091
PDR1p_0049	0	0	0	0	0	0	0	0	1	0	0	0	0	0	0	0	0	0	0	0	1	0	0	0	0	0	0	0	0	0	0	1	1	0	0	1	0	0	1	1	0	0	0	0			0.159091
PDR1p_0119	0	1	0	0	0	0	0	0	0	0	1	0	0	0	0	1	0	0	1	0	0	0	1	0	0	0	0	1	0	0	0	0	0	0	0	0	0	0	0	0	0	0	0	1			0.159091
PDR1p_0130	0	0	0	0	1	0	0	1	0	0	1	0	1	0	0	1	1	1	0	0	0	0	0	0	0	0	0	0	0	0	0	0	0	0	0	0	0	0	0	0	0	0	0	0			0.159091
PDR1p_0131	0	0	0	0	0	1	0	0	1	0	0	1	0	0	0	0	0	0	0	0	0	0	0	0	0	0	0	0	0	0	0	1	0	0	0	1	0	0	1	0	0	0	1	0			0.159091
PDR1p_0141	0	1	0	0	1	0	0	1	0	0	0	0	0	0	0	0	0	0	0	0	0	0	0	0	1	0	0	0	0	1	0	0	1	0	0	1	0	0	0	0	0	0	0	0			0.159091
PDR1p_0142	0	1	0	0	0	0	0	0	0	0	0	0	0	0	0	0	0	0	1	0	0	0	0	0	0	0	0	0	1	1	0	0	1	0	1	0	0	0	1	0	0	0	0	0			0.159091
PDR1p_0153	1	0	0	0	0	0	0	0	1	0	0	0	0	0	0	0	0	0	1	0	1	0	1	0	0	0	0	1	0	0	0	1	0	0	0	0	0	0	0	0	0	0	0	0			0.159091
PDR1p_0160	0	0	0	0	0	0	0	0	0	0	0	0	0	0	0	0	0	0	0	0	0	0	0	0	0	0	0	0	0	0	0	0	1	1	1	0	0	1	0	0	0	1	1	1			0.159091
PDR1p_0178	0	1	0	0	0	0	0	0	0	0	0	1	0	0	0	0	0	0	0	0	0	0	0	0	0	0	0	0	0	1	0	1	0	0	0	1	1	1	0	0	0	0	0	0			0.159091
PDR1p_0195	0	0	1	0	0	0	0	0	0	0	0	1	0	0	0	0	0	0	0	1	0	0	1	0	0	0	0	0	0	0	0	1	0	0	0	1	1	0	0	0	0	0	0	0			0.159091
PDR1p_0197	1	0	1	1	0	0	0	0	0	1	0	0	0	0	0	0	0	0	0	1	0	0	0	0	0	0	1	0	0	0	0	0	0	0	1	0	0	0	0	0	0	0	0	0			0.159091
PDR1p_0249	0	0	0	0	0	0	0	0	0	1	0	0	0	1	1	0	0	0	1	0	0	0	0	1	0	1	0	0	0	0	0	0	0	0	0	1	0	0	0	0	0	0	0	0			0.159091
PDR1p_0013	0	0	0	0	0	0	0	0	0	0	0	0	0	0	0	0	0	0	0	0	0	0	0	0	0	0	0	0	1	0	0	1	0	1	0	1	0	1	1	0	0	0	1	1			0.181818
PDR1p_0041	0	0	0	0	0	0	0	0	0	0	0	0	0	1	0	1	0	0	1	0	0	1	1	1	0	0	0	1	0	1	0	0	0	0	0	0	0	0	0	0	0	0	0	0			0.181818
PDR1p_0086	1	0	1	0	1	0	0	1	0	0	0	1	1	0	0	1	1	0	0	0	0	0	0	0	0	0	0	0	0	0	0	0	0	0	0	0	0	0	0	0	0	0	0	0			0.181818
PDR1p_0138	1	0	0	1	0	1	0	0	0	0	1	0	0	0	0	1	0	1	0	0	0	0	0	1	0	0	0	1	0	0	0	0	0	0	0	0	0	0	0	0	0	0	0	0			0.181818
PDR1p_0146	1	0	1	0	1	0	1	0	1	0	0	1	0	0	0	0	0	0	0	0	0	0	0	0	0	0	0	0	0	0	0	0	0	0	0	0	0	0	0	1	0	1	0	0			0.181818
PDR1p_0168	0	0	1	1	0	0	1	0	1	0	0	1	0	0	0	0	0	0	1	0	0	0	0	1	1	0	0	0	0	0	0	0	0	0	0	0	0	0	0	0	0	0	0	0			0.181818
PDR1p_0173	0	1	0	0	0	0	0	0	0	0	0	0	0	0	0	0	0	0	0	1	0	0	0	0	0	0	0	0	1	0	1	0	1	1	0	0	0	1	0	1	0	0	0	0			0.181818
PDR1p_0201	1	0	0	0	0	0	0	1	0	0	0	0	0	1	1	0	0	1	1	0	0	0	0	1	0	1	0	0	0	0	0	0	0	0	0	0	0	0	0	0	0	0	0	0			0.181818
PDR1p_0212	0	0	0	1	0	0	0	0	0	1	0	0	0	0	1	0	0	0	1	0	1	0	0	1	0	1	0	0	0	0	0	0	0	0	1	0	0	0	0	0	0	0	0	0			0.181818
PDR1p_0213	0	0	0	0	0	0	0	0	0	0	0	0	0	0	0	0	0	1	0	0	0	0	0	0	0	0	0	0	1	0	1	1	0	1	0	0	1	1	1	0	0	0	0	0			0.181818
PDR1p_0223	0	0	0	0	0	0	0	0	0	0	0	0	0	1	1	0	0	1	1	0	0	0	1	1	0	1	0	0	0	0	0	0	0	0	0	0	0	0	0	1	0	0	0	0			0.181818
PDR1p_0248	1	0	0	0	0	0	0	0	0	1	0	1	1	0	0	0	0	0	0	0	0	0	0	0	0	0	1	0	0	0	0	0	0	0	0	0	0	0	0	1	1	0	1	0			0.181818
PDR1p_0275	0	1	0	0	0	0	0	0	0	0	0	0	0	1	1	1	0	0	1	0	0	0	1	0	0	1	0	0	0	0	0	1	0	0	0	0	0	0	0	0	0	0	0	0			0.181818
PDR1p_0022	0	0	0	0	0	0	0	0	0	0	0	0	0	0	0	0	0	0	0	0	0	0	0	0	0	0	0	0	0	0	0	0	0	0	0	1	1	1	1	1	1	1	1	1			0.204545
PDR1p_0026	1	0	0	1	0	0	0	0	0	0	0	0	0	0	0	1	0	1	0	0	1	0	1	1	1	0	0	0	0	0	0	0	0	0	0	0	0	0	0	0	0	0	0	1			0.204545
PDR1p_0030	0	0	0	1	0	1	0	0	0	0	0	0	0	0	0	0	0	0	0	0	0	0	0	0	0	0	1	0	0	0	0	1	0	0	0	1	1	1	1	1	0	0	0	0			0.204545
PDR1p_0038	0	1	1	1	1	1	1	0	0	1	0	0	0	1	0	0	0	0	0	0	0	0	0	0	0	0	0	0	0	0	1	0	0	0	0	0	0	0	0	0	0	0	0	0			0.204545
PDR1p_0039	0	0	0	0	0	0	1	0	0	0	0	0	0	1	1	1	0	1	1	0	0	0	1	0	1	1	0	0	0	0	0	0	0	0	0	0	0	0	0	0	0	0	0	0			0.204545
PDR1p_0057	0	0	0	0	0	0	0	0	0	0	0	0	0	0	0	0	0	0	0	0	0	0	0	1	0	1	0	0	0	0	0	1	0	0	1	1	1	1	1	1	0	0	0	0			0.204545
PDR1p_0066	1	1	0	0	0	0	0	0	0	0	0	0	0	1	1	0	0	1	0	0	0	0	1	0	0	1	0	1	1	0	0	0	0	0	0	0	0	0	0	0	0	0	0	0			0.204545
PDR1p_0085	1	0	0	0	0	0	0	1	1	0	0	0	0	0	0	0	1	0	0	1	1	0	0	0	1	0	0	0	1	0	0	0	0	0	0	0	0	0	0	0	0	0	0	1			0.204545
PDR1p_0111	0	0	0	0	0	0	0	1	0	0	0	0	0	0	0	0	1	0	0	1	0	0	0	0	0	0	0	0	1	0	1	1	0	0	0	1	1	1	0	0	0	0	0	0			0.204545
PDR1p_0179	0	0	0	0	0	0	1	1	1	0	0	0	0	0	0	0	0	0	0	1	1	0	0	0	0	0	0	0	0	0	0	1	0	0	0	1	1	1	0	0	0	0	0	0			0.204545
PDR1p_0205	0	0	0	0	0	0	0	0	0	0	0	0	0	0	0	0	0	1	0	0	0	0	0	0	1	1	0	0	0	0	1	0	0	1	1	0	1	0	0	0	0	1	0	1			0.204545
PDR1p_0262	0	0	0	0	0	0	0	0	0	0	0	0	0	0	0	1	0	0	1	0	0	0	0	0	0	0	0	0	0	0	0	0	1	0	1	0	0	1	1	1	1	0	1	0			0.204545
PDR1p_0002	1	0	1	0	1	0	0	1	0	0	0	0	0	0	0	0	1	0	0	0	0	1	0	1	1	1	0	1	0	0	0	0	0	0	0	0	0	0	0	0	0	0	0	0			0.227273
PDR1p_0159	0	0	0	0	0	0	1	0	0	0	0	1	0	0	0	0	0	0	0	0	0	0	0	0	0	0	1	0	0	0	0	1	0	0	0	1	1	0	0	1	0	1	1	1			0.227273
PDR1p_0164	1	0	0	0	0	0	0	1	0	0	0	0	0	1	1	0	0	1	0	0	1	0	1	0	0	0	1	1	0	0	0	0	0	0	0	0	0	0	0	0	0	0	0	1			0.227273
PDR1p_0165	0	0	1	0	1	0	1	1	0	1	0	1	1	0	0	0	1	0	1	0	0	0	0	0	0	0	0	0	1	0	0	0	0	0	0	0	0	0	0	0	0	0	0	0			0.227273
PDR1p_0181	0	0	0	0	0	0	0	0	0	0	0	0	0	0	0	0	0	0	0	0	0	0	0	0	0	0	0	0	1	0	1	1	1	1	0	1	1	1	1	0	0	0	0	1			0.227273
PDR1p_0185	1	0	0	0	1	0	1	0	1	1	1	0	1	0	0	0	1	0	1	1	0	0	0	0	0	0	0	0	0	0	0	0	0	0	0	0	0	0	0	0	0	0	0	0			0.227273
PDR1p_0218	0	0	0	0	0	1	1	1	0	0	0	0	1	0	0	0	0	0	0	0	1	0	0	0	0	0	1	0	0	0	0	1	0	0	1	0	1	1	0	0	0	0	0	0			0.227273
PDR1p_0236	1	0	0	0	0	0	0	0	0	0	0	1	0	0	0	1	0	1	0	0	0	1	0	1	1	1	1	1	0	0	0	0	0	0	0	0	0	0	0	0	0	0	0	0			0.227273
PDR1p_0004	0	1	0	0	0	0	1	0	0	0	0	0	0	0	0	1	0	0	0	0	0	0	0	0	1	0	1	0	1	1	0	1	0	0	0	0	0	0	0	1	1	0	1	0			0.25
PDR1p_0015	0	0	0	0	0	0	0	0	0	0	0	0	0	0	0	0	0	0	0	0	0	0	0	0	0	0	1	0	1	1	0	1	0	1	0	1	0	1	1	1	1	1	0	0			0.25
PDR1p_0024	0	0	0	0	0	0	0	0	0	0	0	0	0	0	1	0	0	0	0	0	1	0	0	0	0	0	0	0	0	0	0	1	1	1	1	1	1	1	1	1	0	0	0	0			0.25
PDR1p_0027	0	0	1	0	1	0	1	1	0	1	0	0	1	1	0	1	0	0	0	1	1	0	0	0	1	0	0	0	0	0	0	0	0	0	0	0	0	0	0	0	0	0	0	0			0.25
PDR1p_0040	1	0	1	1	0	1	0	0	1	0	1	0	0	0	0	0	0	0	0	1	0	0	0	0	0	0	1	1	0	0	0	0	0	0	0	0	0	0	0	0	1	0	1	0			0.25
PDR1p_0081	1	1	1	0	1	1	0	1	0	1	0	0	0	0	0	0	1	0	1	1	0	0	0	0	1	0	0	0	0	0	0	0	0	0	0	0	0	0	0	0	0	0	0	0			0.25
PDR1p_0084	1	0	0	0	0	0	0	1	1	0	0	0	1	0	0	0	1	0	1	1	1	0	0	0	1	0	0	0	1	0	0	0	0	0	0	0	0	0	0	0	0	0	0	1			0.25
PDR1p_0132	1	0	0	0	0	0	1	1	0	1	0	0	1	1	1	0	1	0	0	0	0	0	1	0	0	0	0	0	0	1	0	0	0	0	0	0	0	0	0	0	1	0	0	0			0.25
PDR1p_0152	0	0	1	0	0	0	0	0	0	0	0	1	0	0	0	1	0	0	0	1	0	0	0	0	1	0	0	0	0	0	0	0	0	0	0	0	1	1	0	1	1	0	1	1			0.25
PDR1p_0216	0	0	0	0	1	0	1	0	0	0	1	1	0	0	0	0	0	0	0	0	0	0	1	1	0	0	0	1	0	0	0	1	1	0	1	1	0	0	0	0	0	0	0	0			0.25
PDR1p_0220	0	0	0	0	0	0	0	0	0	0	0	0	0	1	1	1	0	0	1	0	0	0	0	1	0	1	0	1	0	1	0	0	0	0	0	0	0	0	1	0	0	1	0	1			0.25
PDR1p_0230	0	0	0	0	0	0	0	0	1	0	0	0	0	0	1	0	0	0	0	1	0	0	0	0	0	0	1	0	0	0	0	0	1	0	1	0	0	1	1	1	0	0	1	1			0.25
PDR1p_0252	0	0	0	0	0	0	0	1	0	0	0	0	0	1	0	1	1	0	0	0	0	0	0	0	0	0	1	0	0	0	0	0	0	0	0	1	1	1	1	0	1	0	0	1			0.25
PDR1p_0257	1	1	0	0	0	0	0	1	0	0	0	1	1	0	0	0	1	1	0	1	0	0	0	0	0	0	1	0	0	1	0	1	0	0	0	0	0	0	0	0	0	0	0	0			0.25
PDR1p_0009	1	0	0	0	0	0	0	1	0	1	0	0	1	0	0	0	1	0	0	0	0	0	0	0	0	0	0	0	0	1	1	0	1	1	0	1	0	0	1	0	0	0	0	1			0.272727
PDR1p_0017	0	0	0	0	1	0	0	0	0	0	1	0	1	0	0	0	0	0	0	0	0	0	0	0	1	0	0	0	1	0	0	1	0	0	1	1	1	1	0	0	1	0	1	0			0.272727
PDR1p_0023	1	0	0	0	0	0	0	0	0	0	1	0	0	0	1	0	0	0	0	0	0	0	0	1	0	1	0	0	0	0	1	1	1	1	0	0	0	0	1	0	0	1	1	0			0.272727
PDR1p_0046	1	1	0	0	0	0	1	0	0	0	0	1	0	1	1	1	0	1	1	0	0	0	1	1	0	1	0	0	0	0	0	0	0	0	0	0	0	0	0	0	0	0	0	0			0.272727
PDR1p_0056	0	1	1	1	1	1	1	0	0	1	0	0	0	1	0	0	0	0	0	1	0	0	0	0	0	0	1	0	0	1	0	0	0	0	0	0	0	0	0	0	0	0	0	1			0.272727
PDR1p_0101	0	0	0	0	0	0	0	0	0	0	0	0	0	0	0	0	0	0	0	0	0	0	0	1	0	0	1	0	1	0	1	1	1	1	0	1	1	1	1	0	0	0	0	1			0.272727
PDR1p_0125	1	1	1	0	1	1	0	1	1	0	1	1	0	0	0	0	1	0	0	0	0	0	0	0	1	0	1	0	0	0	0	0	0	0	0	0	0	0	0	0	0	0	0	0			0.272727
PDR1p_0241	1	0	0	0	1	0	0	1	1	0	1	0	0	0	0	0	0	0	1	0	1	1	1	0	0	1	0	0	0	0	0	0	0	0	0	0	0	0	0	1	0	1	0	0			0.272727
PDR1p_0090	1	0	0	0	0	0	0	0	1	0	1	0	0	0	0	1	0	0	0	0	1	1	0	1	0	0	1	1	0	0	0	0	0	0	0	0	0	0	0	1	1	1	1	0			0.295455
PDR1p_0096	0	0	1	1	0	1	0	0	1	0	0	0	0	0	0	0	0	0	0	0	1	0	0	0	0	0	0	0	0	0	1	0	0	0	0	1	0	0	1	1	1	1	1	1			0.295455
PDR1p_0278	0	0	0	0	0	0	0	0	0	1	0	0	0	0	1	0	1	0	0	1	0	1	0	0	0	0	0	1	0	0	0	0	1	1	0	1	1	1	1	0	0	0	0	1			0.295455
PDR1p_0020	1	1	1	0	1	1	0	1	1	0	0	1	1	0	0	0	1	0	0	1	1	0	0	0	1	0	1	0	0	0	0	0	0	0	0	0	0	0	0	0	0	0	0	0			0.318182
PDR1p_0034	0	1	0	0	0	0	0	0	0	0	0	0	0	0	0	0	0	0	0	1	0	0	0	0	0	0	1	0	1	1	1	1	1	1	0	1	1	1	1	1	0	0	0	0			0.318182
PDR1p_0047	1	0	0	0	1	0	0	1	1	0	0	0	0	1	1	0	1	0	1	0	0	1	1	1	0	1	0	1	0	1	0	0	0	0	0	0	0	0	0	0	0	0	0	0			0.318182
PDR1p_0108	1	0	0	0	0	0	0	0	0	0	1	0	0	1	1	1	0	1	1	0	0	1	1	1	0	1	1	1	0	0	0	0	0	0	0	0	0	0	0	0	0	0	1	0			0.318182
PDR1p_0025	1	1	1	1	0	0	1	1	1	0	1	1	1	0	0	0	1	0	0	1	1	0	0	0	1	0	0	0	1	0	0	0	0	0	0	0	0	0	0	0	0	0	0	0			0.340909
PDR1p_0032	1	0	0	0	0	0	0	1	0	0	0	0	0	1	1	0	0	1	1	0	0	1	1	1	0	1	0	1	1	1	0	0	0	0	1	0	0	0	0	0	1	0	0	0			0.340909
PDR1p_0054	1	0	0	0	0	0	0	0	1	0	1	0	0	0	0	0	0	1	1	0	1	1	0	1	0	1	1	1	0	0	1	0	0	1	0	0	0	0	0	0	1	0	0	1			0.340909
PDR1p_0083	1	1	1	1	1	0	1	1	0	1	0	1	1	0	0	0	1	0	0	0	0	1	0	0	1	0	0	0	1	0	0	0	1	0	0	0	0	0	0	0	0	0	0	0			0.340909
PDR1p_0088	1	1	0	0	1	1	1	0	1	1	1	1	0	1	0	1	0	0	1	0	0	0	0	1	0	0	1	0	0	1	0	0	0	0	0	0	0	0	0	0	0	0	0	0			0.340909
PDR1p_0175	1	1	0	1	0	0	0	0	1	0	1	0	0	1	1	1	0	1	0	0	0	1	1	1	0	1	0	1	0	0	0	0	0	0	1	0	0	0	0	0	0	0	0	0			0.340909
PDR1p_0184	1	0	1	1	1	1	1	1	1	1	1	1	1	0	0	0	1	0	0	0	1	0	0	0	0	0	0	0	0	0	0	0	0	0	1	0	0	0	0	0	0	0	0	0			0.340909
PDR1p_0211	0	0	1	1	1	1	0	0	1	1	0	1	1	0	1	0	0	0	0	0	0	0	0	0	1	1	0	0	1	0	0	1	0	0	0	0	0	0	1	0	0	0	1	0			0.340909
PDR1p_0231	1	1	0	0	0	0	0	1	0	0	0	1	1	0	0	1	0	1	0	1	0	1	0	1	0	0	0	1	0	0	0	1	0	0	0	0	1	0	0	0	1	0	0	1			0.340909
PDR1p_0029	1	1	1	0	0	0	0	0	1	1	1	0	1	1	1	0	0	0	0	0	0	0	0	0	0	0	0	0	1	1	0	1	0	1	0	0	1	1	1	0	0	0	0	0			0.363636
PDR1p_0074	1	1	0	0	1	0	1	1	1	0	0	0	1	1	1	1	1	1	1	0	0	0	1	1	0	0	0	0	1	0	0	0	0	0	0	0	0	0	0	0	0	0	0	0			0.363636
PDR1p_0116	1	1	1	1	0	1	1	0	1	1	0	1	0	0	0	0	0	0	0	1	1	1	0	0	0	0	1	0	1	0	0	0	0	0	1	1	0	0	0	0	0	0	0	0			0.363636
PDR1p_0182	1	0	1	0	1	1	1	0	1	1	0	0	0	0	0	0	1	0	1	0	1	0	0	0	1	0	1	0	1	0	1	1	1	0	0	0	0	0	0	0	0	0	0	0			0.363636
PDR1p_0224	1	0	0	0	0	0	0	0	0	0	0	0	0	1	1	1	0	0	1	0	1	1	0	1	1	1	0	1	0	1	0	0	0	0	1	1	0	0	1	0	0	0	0	1			0.363636
PDR1p_0234	0	1	1	1	1	1	1	1	0	1	1	0	1	0	0	0	1	0	0	0	0	0	0	0	0	0	0	0	0	0	1	1	1	0	0	1	1	0	0	0	0	0	0	0			0.363636
PDR1p_0028	0	1	0	1	0	0	1	0	1	0	0	1	0	1	1	1	1	0	1	0	0	1	1	1	0	0	1	0	0	0	1	0	1	0	0	0	0	1	0	0	0	0	0	0			0.386364
PDR1p_0073	1	1	0	0	1	0	1	1	1	0	0	0	1	1	1	1	1	1	1	0	0	0	1	1	0	0	0	1	1	0	0	0	0	0	0	0	0	0	0	0	0	0	0	0			0.386364
PDR1p_0092	1	0	0	1	0	0	0	0	0	0	1	1	0	0	0	1	0	1	1	1	1	1	1	1	0	1	0	1	0	0	0	1	0	0	0	0	1	1	0	0	0	0	0	0			0.386364
PDR1p_0005	1	1	0	0	1	0	0	1	0	0	1	0	1	0	0	1	1	0	1	0	0	0	0	1	1	1	0	1	1	0	1	0	0	1	0	0	0	0	0	1	0	0	1	0			0.409091
PDR1p_0102	1	0	0	0	0	0	0	0	0	0	1	0	0	1	1	0	0	1	1	0	0	0	1	1	0	1	0	1	1	0	0	1	0	0	1	1	1	1	0	1	0	1	0	0			0.409091
PDR1p_0144	1	0	1	1	1	1	1	0	0	1	1	1	1	1	1	0	0	1	1	1	1	1	0	0	0	0	0	0	1	0	0	0	0	0	0	0	0	0	0	0	0	0	0	0			0.409091
PDR1p_0170	1	1	0	0	0	0	0	1	1	0	1	0	1	1	1	0	1	1	1	0	1	1	1	0	0	1	1	0	0	1	0	0	0	0	0	0	0	0	0	0	1	0	0	0			0.409091
PDR1p_0208	0	1	1	1	0	1	1	1	0	0	0	1	1	0	1	0	0	0	0	1	1	0	0	0	0	0	0	0	0	0	1	1	0	0	0	0	1	0	0	1	1	1	1	0			0.409091
PDR1p_0059	1	1	1	0	0	1	1	0	0	1	0	1	1	1	0	1	0	0	0	1	0	0	0	0	1	1	0	1	1	0	0	0	1	1	0	0	0	0	1	0	0	0	0	1			0.431818
PDR1p_0077	1	1	1	1	0	0	1	1	1	0	0	1	1	0	1	1	1	0	0	1	0	0	0	0	1	0	0	0	1	0	1	0	0	0	0	0	0	0	0	0	1	1	1	0			0.431818
PDR1p_0113	1	1	1	1	1	1	1	1	0	1	1	1	0	0	0	0	1	1	1	1	0	0	0	1	0	0	0	0	1	1	0	0	1	0	0	0	0	0	0	0	0	0	0	0			0.431818
PDR1p_0217	0	1	1	1	1	0	0	1	0	0	1	0	0	0	0	0	0	1	1	0	0	0	0	1	0	1	0	0	1	1	0	1	0	0	0	1	0	0	1	1	0	1	1	1			0.431818
PDR1p_0235	1	1	0	1	1	0	0	1	1	0	0	0	0	1	1	1	1	1	0	0	1	1	1	1	1	1	0	1	0	0	0	1	0	0	0	0	0	0	0	0	0	0	0	0			0.431818
PDR1p_0008	1	1	0	0	1	0	0	0	0	1	1	0	0	0	0	0	0	1	1	0	0	1	0	1	1	1	0	1	0	0	0	1	0	1	1	1	0	1	1	1	0	0	0	1			0.454545
PDR1p_0094	1	1	1	1	1	1	1	1	1	0	0	1	0	1	1	1	1	0	0	1	0	0	0	0	0	1	1	0	1	0	0	0	0	1	0	0	0	0	1	0	0	0	0	0			0.454545
PDR1p_0154	1	1	1	1	1	1	1	1	1	1	1	1	1	0	0	1	1	0	0	1	1	0	0	0	1	0	1	0	1	0	0	0	0	0	0	0	0	0	0	0	0	0	0	0			0.454545
PDR1p_0156	1	1	1	0	1	0	0	1	0	0	1	1	1	1	1	1	1	1	1	0	0	1	1	0	1	0	1	1	0	0	0	0	0	0	0	0	1	0	0	0	0	0	0	0			0.454545
PDR1p_0263	1	1	1	1	1	1	1	1	0	1	0	1	1	0	0	0	1	0	0	1	0	0	0	1	1	1	0	0	1	0	0	1	0	0	0	0	0	0	1	0	0	0	0	1			0.454545
PDR1p_0143	1	0	0	0	0	0	0	0	0	0	1	0	0	1	1	1	0	1	0	0	0	1	1	1	0	1	0	1	0	0	0	1	0	1	0	1	1	1	1	0	1	1	1	1			0.477273
PDR1p_0227	1	1	0	0	0	0	0	1	1	0	1	0	0	1	1	1	1	1	1	0	1	1	0	1	1	1	0	1	1	0	0	1	1	0	1	0	0	0	0	0	0	0	0	0			0.477273
PDR1p_0087	1	1	1	0	1	1	1	1	1	1	1	1	1	1	0	1	1	0	1	0	0	0	0	1	1	1	1	1	0	1	0	0	0	0	0	0	0	0	0	0	0	0	0	0			0.5
PDR1p_0228	0	1	1	1	0	1	1	0	1	1	0	1	0	0	0	0	0	1	0	1	1	0	0	0	0	1	0	0	1	1	0	1	1	0	1	1	0	1	1	1	1	0	0	0			0.5
PDR1p_0246	1	1	1	1	0	0	0	1	0	1	0	1	0	1	1	1	1	0	1	1	0	0	1	1	0	1	0	0	0	0	0	1	0	0	0	1	1	1	1	0	0	0	0	1			0.5
PDR1p_0259	1	1	1	0	1	1	1	1	1	1	1	1	1	0	0	0	1	0	0	1	1	0	0	1	1	0	1	0	1	0	1	1	0	0	0	0	0	1	0	0	0	0	0	0			0.5
PDR1p_0006	1	1	1	1	0	1	1	1	0	0	0	1	1	1	1	1	1	1	1	1	0	1	0	1	1	1	0	1	0	0	1	0	0	0	0	0	0	0	1	0	0	0	0	0			0.522727
PDR1p_0063	1	1	1	1	1	1	1	1	0	1	1	1	0	1	1	1	0	1	0	0	1	1	1	1	0	1	0	1	0	0	0	0	0	0	0	0	0	0	0	0	0	1	0	1			0.522727
PDR1p_0192	1	1	1	1	1	1	1	1	1	0	0	0	1	0	0	1	1	1	1	0	1	0	1	1	1	1	0	1	0	1	0	0	1	0	0	1	0	1	0	0	0	0	0	0			0.545455
PDR1p_0035	0	1	0	1	1	0	1	0	1	1	0	1	0	0	0	0	0	0	0	1	1	0	0	0	1	0	0	0	1	1	1	1	1	1	1	0	1	1	1	1	1	1	1	1			0.568182
PDR1p_0050	1	1	1	1	1	1	1	1	1	1	1	0	1	1	0	1	1	0	0	1	1	0	0	1	0	0	1	1	1	0	0	1	0	0	0	1	1	1	0	1	0	0	0	0			0.590909
PDR1p_0080	1	1	1	1	1	1	1	1	1	1	1	1	1	1	1	1	1	1	1	1	0	1	1	1	1	0	1	0	0	0	0	1	0	0	0	0	0	0	0	0	0	0	0	0			0.590909
PDR1p_0214	1	1	1	1	1	0	1	0	0	1	1	1	0	1	1	1	0	0	1	1	0	0	1	1	1	1	0	1	1	0	0	1	0	0	0	0	1	1	0	1	1	0	1	0			0.590909
PDR1p_0016	1	1	1	1	1	1	1	1	1	1	1	1	0	1	1	1	1	1	1	1	1	1	1	0	0	0	1	0	0	1	1	0	0	0	0	0	0	0	0	1	0	0	0	1			0.613636
PDR1p_0140	1	1	1	1	1	1	1	1	1	1	1	1	1	1	1	1	1	1	1	1	1	1	1	1	1	1	0	0	0	0	0	0	0	0	0	1	0	0	0	0	0	0	0	0			0.613636
PDR1p_0210	1	0	1	1	1	1	1	1	1	1	0	1	1	1	1	1	1	1	1	1	1	1	1	0	0	1	1	0	1	0	0	0	0	0	0	0	0	0	1	0	1	0	0	1			0.613636
PDR1p_0261	1	1	1	1	1	1	1	1	1	1	0	1	1	1	1	0	1	1	1	1	1	1	1	1	1	1	0	1	1	0	0	1	0	0	0	0	0	0	0	0	0	0	0	0			0.613636
PDR1p_0036	1	1	1	1	1	1	1	1	1	1	1	1	1	1	1	1	1	1	1	1	1	1	1	0	1	0	0	0	1	0	0	1	0	0	0	1	0	1	0	0	0	0	0	0			0.636364
PDR1p_0240	1	1	1	1	1	1	1	1	1	1	1	1	0	1	1	1	1	1	0	1	0	1	1	0	1	0	1	1	1	0	1	1	1	0	0	0	0	0	0	0	0	1	0	0			0.636364
PDR1p_0098	1	0	0	1	1	1	0	1	1	0	1	1	1	1	1	1	1	1	0	1	1	0	1	1	0	1	1	1	0	0	1	1	0	0	1	1	0	0	0	1	1	1	1	0			0.659091
PDR1p_0134	1	1	1	1	1	1	1	1	1	1	1	1	1	1	1	1	1	1	1	1	1	1	1	1	1	1	1	1	1	1	0	0	0	0	0	0	0	0	0	0	0	0	0	0			0.681818
PDR1p_0150	0	1	1	1	1	1	1	1	1	1	0	1	1	0	1	1	1	0	0	1	0	0	1	1	1	1	1	0	1	0	1	1	1	1	0	0	1	1	1	0	0	0	1	1			0.681818
PDR1p_0001	1	1	1	0	1	1	1	1	1	0	1	0	0	1	1	1	1	0	1	1	1	0	0	1	1	0	1	0	1	0	0	1	0	1	1	1	0	1	1	1	1	1	1	1			0.704545
PDR1p_0079	1	1	1	1	1	1	1	1	1	1	1	1	1	1	1	1	1	1	1	1	1	1	1	1	1	1	1	1	1	0	0	0	1	0	0	0	0	0	0	0	0	0	0	1			0.704545
PDR1p_0242	1	1	1	1	1	1	1	1	1	1	1	1	1	0	0	0	1	0	1	0	1	0	0	0	1	1	1	0	1	1	1	1	1	1	1	1	1	1	1	0	0	0	0	1			0.704545
PDR1p_0148	1	1	1	1	1	0	0	1	1	0	1	1	0	1	1	1	1	1	1	0	1	1	1	1	1	1	1	1	1	1	0	1	1	0	0	1	1	0	0	1	1	0	0	1			0.727273
PDR1p_0276	1	1	1	1	1	1	1	1	1	1	1	1	0	1	1	1	1	1	1	1	1	1	1	1	1	1	1	1	1	1	0	1	0	0	0	1	0	0	0	0	0	0	0	1			0.727273
PDR1p_0207	1	1	1	1	1	1	1	1	1	0	1	1	1	0	1	0	0	1	1	1	1	0	1	1	1	1	0	1	1	1	1	0	0	1	0	1	0	1	1	1	1	0	1	1			0.75
PDR1p_0268	1	1	1	1	1	1	1	1	1	1	1	1	1	1	1	1	1	1	1	0	1	1	1	1	1	1	1	1	1	1	0	1	0	0	0	0	0	0	0	1	0	1	1	0			0.75
PDR1p_0281	1	1	1	1	1	1	1	0	1	1	1	1	0	1	1	1	0	1	1	1	1	1	1	1	0	1	1	1	1	1	1	1	0	1	0	1	0	0	1	0	0	0	1	1			0.75
PDR1p_0033	1	1	1	1	1	1	1	1	1	1	1	1	1	1	1	1	1	1	1	1	1	1	1	1	1	1	0	1	1	0	0	0	1	1	0	0	0	0	1	1	1	1	1	1			0.818182
PDR1p_0145	1	1	1	1	1	1	1	1	1	1	0	1	1	1	0	0	1	1	1	1	1	1	1	1	1	1	1	1	1	1	1	1	1	1	1	1	1	1	1	0	0	1	0	1			0.863636
PDR1p_0147	1	1	1	1	1	1	1	1	1	1	1	1	1	1	1	1	0	1	1	1	1	1	1	1	0	1	1	1	0	1	1	1	1	0	1	1	1	1	1	1	0	0	1	1			0.863636
PDR1p_0011	1	1	1	1	1	1	1	1	1	1	1	1	1	1	1	1	1	1	1	1	1	1	1	1	1	1	1	1	1	1	1	1	1	1	1	1	1	1	1	0	1	0	0	1			0.931818
PDR1p_0174	1	1	1	1	1	1	1	1	1	1	1	1	1	1	1	1	1	1	1	0	1	1	1	1	1	1	1	1	1	1	1	1	1	1	1	1	1	1	1	0	1	1	1	1			0.954545
PDR1p_0162	1	1	1	1	1	1	1	1	1	1	1	1	1	1	1	1	1	1	1	1	1	1	1	1	1	1	1	1	1	1	1	1	1	1	1	1	1	1	1	1	1	1	1	1			1
PDR1p_0163	1	1	1	1	1	1	1	1	1	1	1	1	1	1	1	1	1	1	1	1	1	1	1	1	1	1	1	1	1	1	1	1	1	1	1	1	1	1	1	1	1	1	1	1			1
PDR1p_0171	1	1	1	1	1	1	1	1	1	1	1	1	1	1	1	1	1	1	1	1	1	1	1	1	1	1	1	1	1	1	1	1	1	1	1	1	1	1	1	1	1	1	1	1			1
PDR1p_0172	1	1	1	1	1	1	1	1	1	1	1	1	1	1	1	1	1	1	1	1	1	1	1	1	1	1	1	1	1	1	1	1	1	1	1	1	1	1	1	1	1	1	1	1			1
PDR1p_0265	1	1	1	1	1	1	1	1	1	1	1	1	1	1	1	1	1	1	1	1	1	1	1	1	1	1	1	1	1	1	1	1	1	1	1	1	1	1	1	1	1	1	1	1			1
[truncated: 12 more columns]

## Sheet: Table S2 Cyclops SSAPs
	africa	P. sativum	P. sativum	P. sativum	africa	P. sativum	P. sativum	africa	transcaucasicum	cennia P. sativum	asiatic	P. sativum	P. jomardii	asiatic	asiatic	asiatic	africa	asiatic	asiatic	P. sativum	transcaucasicum	asiatic	asiatic	asiatic	odd	asiatic	P. elatius (odd)	asiatic	P. elatius (odd)	P. humile	P. elatius (gp2)	P. elatius (gp1)	P. elatius (gp2)	P. elatius (gp2)	P. elatius (odd)	P. elatius (gp1)	P. elatius (gp1)	P. elatius (gp1)	P. elatius (gp2)	P. fulvum	P. fulvum	P. fulvum	P. fulvum	P. abyssinicum
	JI156	JI209	JI201	JI52	JI185	JI1030	JI284	JI189	JI2546	JI399	JI804	JI1846	JI250	JI95	JI102	JI1428	JI281	JI109	JI1346	JI2713	JI45	JI181	JI1854	JI85	JI1089	JI241	JI2201	JI2545	JI199	JI1794	JI1074	JI1096	JI64	JI262	JI261	JI1093	JI2055	JI1092	JI254	JI224	JI1006	JI1010	JI1796	JI225			occupied site allele frequency
TcyATC_004	0	0	0	0	0	0	0	0	0	0	0	0	0	0	0	0	0	0	0	0	0	0	0	0	0	0	0	0	0	0	0	0	0	0	0	0	0	0	0	0	0	1	0	0		Cyclops	0.0227273		Cyclops
TcyATC_005	0	0	0	0	0	0	0	0	0	0	0	0	0	0	0	0	0	0	0	0	0	0	0	0	0	0	0	1	0	0	0	0	0	0	0	0	0	0	0	0	0	0	0	0			0.0227273		p(occupied)
TcyATC_016	0	0	0	0	0	0	0	0	0	0	0	0	0	0	0	0	0	0	0	0	0	0	0	0	0	0	0	0	0	0	0	0	0	0	1	0	0	0	0	0	0	0	0	0			0.0227273		q(empty)
TcyATC_058	0	0	0	0	0	0	0	0	0	0	0	0	0	0	0	0	0	0	0	0	0	0	0	0	0	0	0	0	0	0	0	0	0	0	0	0	0	0	0	0	0	0	0	1			0.0227273		H(sub)e
TcyATC_116	0	0	0	0	0	0	0	0	0	0	0	0	0	0	0	0	0	0	0	0	0	0	0	0	0	0	0	0	0	0	0	0	0	0	0	0	0	0	0	0	0	0	1	0			0.0227273		4Neν
TcyATC_133	0	0	0	0	0	0	0	0	0	0	0	0	0	0	0	0	0	0	0	0	0	0	0	0	0	0	0	0	0	0	0	0	0	0	0	0	0	0	0	0	1	0	0	0			0.0227273
TcyATC_134	0	0	0	0	0	0	0	0	0	0	0	0	0	0	0	0	0	0	0	0	0	0	0	0	0	0	0	0	0	0	0	0	0	0	0	0	0	0	0	0	0	0	1	0			0.0227273
TcyATC_147	0	0	0	0	0	0	0	0	0	0	0	0	0	0	0	0	0	0	0	0	0	0	0	0	0	0	0	0	0	0	0	0	0	0	0	0	0	0	0	0	0	0	1	0			0.0227273
TcyATC_148	0	0	0	0	0	0	0	0	0	0	0	0	0	0	0	0	0	0	0	0	0	0	0	0	0	0	0	0	0	0	0	0	0	0	0	0	0	0	0	0	0	0	0	1			0.0227273
TcyATC_151	0	0	0	0	0	0	0	0	0	0	0	0	0	0	0	0	0	0	0	0	0	0	0	0	0	0	0	0	0	0	0	0	0	0	0	0	0	0	0	0	0	1	0	0			0.0227273
TcyATC_159	0	0	0	0	0	0	0	0	0	0	0	0	0	0	0	0	0	0	0	0	0	0	0	0	0	0	0	0	0	1	0	0	0	0	0	0	0	0	0	0	0	0	0	0			0.0227273
TcyATC_162	0	0	0	0	0	0	0	0	0	0	0	0	0	0	0	0	0	0	0	0	0	0	0	0	0	0	0	0	0	1	0	0	0	0	0	0	0	0	0	0	0	0	0	0			0.0227273
TcyATT_008	0	0	0	0	0	0	0	0	0	0	0	0	0	0	0	0	0	0	0	0	0	0	0	0	0	0	0	0	0	0	0	0	0	0	0	0	0	0	0	0	0	0	0	1			0.0227273
TcyATT_025	0	0	0	0	0	0	0	0	0	0	0	0	0	0	0	0	0	0	0	0	0	0	0	0	0	0	0	0	0	1	0	0	0	0	0	0	0	0	0	0	0	0	0	0			0.0227273
TcyATT_062	0	0	0	0	0	0	0	0	0	0	0	0	0	0	0	0	0	0	0	0	0	0	0	0	0	0	0	0	0	0	0	0	0	0	0	0	0	0	0	1	0	0	0	0			0.0227273
TcyATT_074	0	0	0	0	0	0	0	0	0	0	0	0	0	0	0	0	0	0	0	0	0	0	0	0	0	0	0	0	0	0	0	0	0	0	1	0	0	0	0	0	0	0	0	0			0.0227273
TcyATT_090	0	0	0	0	0	0	0	0	0	0	0	0	0	0	0	0	0	0	0	0	0	0	0	0	0	0	0	0	0	0	0	0	0	0	0	0	0	0	0	0	0	0	1	0			0.0227273
TcyATT_116	0	0	0	0	0	0	0	0	0	0	0	0	0	0	0	0	0	0	0	0	0	0	0	0	1	0	0	0	0	0	0	0	0	0	0	0	0	0	0	0	0	0	0	0			0.0227273
TcyATT_127	0	0	0	0	0	0	0	0	0	0	0	0	0	0	0	0	0	0	0	0	0	0	0	0	1	0	0	0	0	0	0	0	0	0	0	0	0	0	0	0	0	0	0	0			0.0227273
TcyATT_143	0	0	0	0	0	0	0	0	0	0	0	0	0	0	0	0	0	0	0	0	0	0	0	0	0	0	0	0	0	0	0	0	0	0	0	0	0	0	0	1	0	0	0	0			0.0227273
TcyATT_150	0	0	0	0	0	0	0	0	0	0	0	0	0	0	0	0	0	0	0	0	0	0	0	0	0	0	0	0	0	0	0	0	0	0	1	0	0	0	0	0	0	0	0	0			0.0227273
TcyATC_007	0	0	0	0	0	0	0	0	0	0	0	0	0	0	0	0	0	0	0	0	0	0	0	0	0	0	0	0	0	0	0	0	0	0	0	0	0	0	0	1	0	0	1	0			0.0454545
TcyATC_047	0	0	1	0	0	0	0	0	0	0	0	0	0	0	0	0	0	0	0	0	0	0	0	0	0	0	0	0	0	1	0	0	0	0	0	0	0	0	0	0	0	0	0	0			0.0454545
TcyATC_052	1	0	0	0	0	0	0	0	0	0	0	0	1	0	0	0	0	0	0	0	0	0	0	0	0	0	0	0	0	0	0	0	0	0	0	0	0	0	0	0	0	0	0	0			0.0454545
TcyATC_062	0	0	0	0	0	0	0	0	0	0	0	0	0	0	0	0	0	0	0	0	0	0	0	0	0	0	0	0	0	0	0	0	0	0	0	0	0	0	0	1	0	0	0	1			0.0454545
TcyATC_064	0	0	0	0	0	0	0	0	0	0	0	0	0	0	0	0	0	0	0	0	0	0	1	0	0	0	0	1	0	0	0	0	0	0	0	0	0	0	0	0	0	0	0	0			0.0454545
TcyATC_065	0	0	0	0	0	0	0	0	0	0	0	0	0	0	0	0	0	0	0	0	0	0	0	0	0	0	0	0	0	0	0	0	0	0	0	0	0	0	0	0	1	1	0	0			0.0454545
TcyATC_071	0	0	0	0	0	0	0	0	0	0	0	0	0	0	0	0	0	0	0	0	0	0	0	0	0	0	0	1	0	0	0	0	0	0	1	0	0	0	0	0	0	0	0	0			0.0454545
TcyATC_073	0	0	0	0	0	0	0	0	0	0	0	0	0	0	0	0	0	0	0	0	0	0	0	0	0	0	0	0	0	0	0	0	0	0	0	1	0	1	0	0	0	0	0	0			0.0454545
TcyATC_078	0	0	0	0	0	0	0	0	0	0	0	0	0	0	0	0	0	0	0	0	0	0	0	0	0	0	0	0	0	0	0	0	1	0	0	0	0	0	0	0	0	1	0	0			0.0454545
TcyATC_082	0	0	0	0	0	0	0	0	0	0	0	0	0	0	0	0	0	0	0	0	0	0	0	0	0	0	0	0	0	0	0	0	0	0	1	0	0	0	0	1	0	0	0	0			0.0454545
TcyATC_108	0	0	0	0	0	0	0	0	0	0	0	0	0	0	0	0	0	0	0	0	0	0	0	0	0	0	0	1	0	0	1	0	0	0	0	0	0	0	0	0	0	0	0	0			0.0454545
TcyATC_120	0	0	0	0	0	0	0	0	0	0	0	0	0	0	0	0	0	0	0	0	0	0	0	0	0	0	0	0	0	0	0	0	0	0	0	1	0	1	0	0	0	0	0	0			0.0454545
TcyATC_137	0	0	0	0	0	0	0	0	0	0	0	0	0	0	0	0	0	0	0	0	0	0	0	0	0	0	0	0	0	0	0	0	0	0	1	0	0	0	0	0	1	0	0	0			0.0454545
TcyATC_141	0	0	0	0	0	0	0	0	0	0	0	0	0	0	0	0	0	0	0	0	0	0	0	0	0	0	0	1	0	0	0	0	0	0	0	0	0	0	0	1	0	0	0	0			0.0454545
TcyATC_143	0	0	0	0	0	0	0	0	0	0	0	0	0	0	0	0	0	0	0	0	0	0	0	0	0	0	0	1	0	0	0	0	0	0	0	0	0	0	0	1	0	0	0	0			0.0454545
TcyATC_145	0	0	0	0	0	0	0	0	0	0	0	0	0	0	0	0	0	0	0	0	0	0	0	0	0	0	0	0	0	0	0	0	0	0	0	0	0	0	0	0	1	0	1	0			0.0454545
TcyATC_146	0	0	0	0	0	0	0	0	0	0	0	0	0	0	0	0	0	0	0	0	0	0	0	0	0	0	0	0	0	0	1	0	0	0	0	0	0	0	0	0	0	0	0	1			0.0454545
TcyATC_152	0	0	0	0	0	0	0	0	0	0	0	0	0	0	0	0	0	0	0	0	0	0	0	0	0	0	0	0	0	0	0	0	0	0	0	0	0	0	0	1	0	0	1	0			0.0454545
TcyATT_004	0	0	0	0	0	0	0	0	0	0	0	0	0	0	0	0	0	0	1	0	0	0	0	0	0	0	0	0	0	1	0	0	0	0	0	0	0	0	0	0	0	0	0	0			0.0454545
TcyATT_013	0	0	0	0	0	0	0	0	0	0	0	0	0	0	0	0	0	0	0	0	0	0	0	0	0	0	0	0	0	0	0	0	0	0	0	0	0	0	0	1	0	0	0	1			0.0454545
TcyATT_073	0	0	0	0	0	0	0	0	0	0	0	0	0	0	0	0	0	0	0	0	0	0	0	0	0	0	0	1	0	0	0	0	0	0	0	0	0	0	0	1	0	0	0	0			0.0454545
TcyATT_085	0	0	0	0	0	0	0	0	0	0	0	0	0	0	0	0	0	0	0	0	0	0	0	0	0	0	0	0	1	0	0	0	0	0	0	0	0	0	0	0	1	0	0	0			0.0454545
TcyATT_087	0	0	0	0	0	0	0	0	0	0	0	0	0	0	0	0	0	0	0	0	0	0	0	0	0	0	1	0	0	0	1	0	0	0	0	0	0	0	0	0	0	0	0	0			0.0454545
TcyATT_092	0	0	0	0	0	0	0	1	0	0	0	0	0	0	0	0	1	0	0	0	0	0	0	0	0	0	0	0	0	0	0	0	0	0	0	0	0	0	0	0	0	0	0	0			0.0454545
TcyATT_096	0	0	0	0	0	0	0	0	0	0	0	0	0	0	0	0	0	0	0	0	0	0	0	0	0	0	0	0	1	0	0	0	0	0	0	0	0	0	1	0	0	0	0	0			0.0454545
TcyATT_098	0	0	0	0	0	0	0	0	0	0	0	0	0	0	0	0	0	0	0	0	0	0	0	0	0	0	1	0	0	1	0	0	0	0	0	0	0	0	0	0	0	0	0	0			0.0454545
TcyATT_110	0	0	0	0	0	0	0	0	0	0	0	0	0	0	0	0	0	0	0	0	0	0	0	0	0	0	0	1	0	0	0	0	0	0	0	0	0	0	0	0	0	1	0	0			0.0454545
TcyATT_126	0	0	0	0	0	0	0	0	0	0	0	0	0	0	0	0	0	0	0	0	0	0	0	0	0	0	0	0	0	1	0	0	0	0	0	0	0	0	0	0	0	0	0	1			0.0454545
TcyATT_138	0	0	0	0	1	0	0	0	0	0	0	0	0	0	0	0	0	0	0	0	0	0	0	0	0	0	0	0	0	0	1	0	0	0	0	0	0	0	0	0	0	0	0	0			0.0454545
TcyATT_144	0	0	0	0	0	0	0	0	0	0	0	0	0	0	0	0	0	0	0	0	0	0	0	0	0	0	0	0	1	0	0	0	0	0	0	0	0	0	0	0	0	1	0	0			0.0454545
TcyATT_145	0	0	0	0	0	0	0	0	0	0	0	0	0	0	0	0	0	0	0	0	0	0	0	0	0	0	0	0	0	0	0	1	0	0	0	0	0	0	1	0	0	0	0	0			0.0454545
TcyATT_155	0	0	0	0	0	0	0	0	0	0	0	0	0	0	0	0	0	0	0	0	0	0	0	0	0	0	0	0	0	0	0	0	0	0	0	0	0	0	0	0	1	1	0	0			0.0454545
TcyATT_163	0	0	0	0	0	0	0	0	0	0	0	0	0	0	0	0	1	0	0	0	0	0	0	0	0	0	0	1	0	0	0	0	0	0	0	0	0	0	0	0	0	0	0	0			0.0454545
TcyATC_009	0	0	0	0	0	0	0	0	0	0	0	0	0	0	0	0	0	0	0	0	0	0	0	0	0	0	0	0	0	0	0	1	0	0	0	0	0	1	0	0	0	0	0	1			0.0681818
TcyATC_032	0	0	0	0	0	0	0	0	0	0	0	0	0	0	0	0	0	0	0	0	0	0	0	0	0	0	0	0	0	0	0	0	0	1	1	0	0	0	1	0	0	0	0	0			0.0681818
TcyATC_041	0	0	0	0	0	0	0	0	0	0	0	0	0	0	0	0	0	0	0	0	0	0	0	1	0	0	0	0	0	1	0	0	0	0	0	0	0	0	0	0	1	0	0	0			0.0681818
TcyATC_056	0	0	0	0	0	0	0	0	0	0	0	0	0	0	0	1	0	0	0	0	0	0	0	0	0	0	0	0	1	0	0	0	0	0	0	0	0	0	1	0	0	0	0	0			0.0681818
TcyATC_057	0	0	0	0	0	0	0	0	0	0	0	0	0	0	0	0	0	0	0	0	0	0	0	0	0	0	0	1	0	0	1	0	0	0	0	0	0	0	0	0	1	0	0	0			0.0681818
TcyATC_083	0	0	0	0	0	0	0	0	0	1	0	0	0	0	0	0	0	0	1	0	0	0	0	0	0	0	0	0	0	0	0	0	0	0	1	0	0	0	0	0	0	0	0	0			0.0681818
TcyATC_105	0	0	0	0	0	0	0	0	0	0	0	0	0	0	0	0	0	0	0	0	0	0	0	0	0	0	0	0	0	0	0	0	1	0	0	0	0	0	0	0	0	1	0	1			0.0681818
TcyATC_121	0	0	0	0	1	0	0	0	0	0	0	0	0	0	0	0	0	0	0	0	0	0	0	0	1	0	0	0	0	0	0	0	0	0	0	0	0	0	0	0	0	0	1	0			0.0681818
TcyATC_123	0	0	0	1	0	0	0	0	1	0	0	0	0	0	0	0	0	0	0	0	0	0	0	0	0	0	0	1	0	0	0	0	0	0	0	0	0	0	0	0	0	0	0	0			0.0681818
TcyATC_139	0	0	0	0	0	0	0	0	0	0	0	0	0	0	0	0	0	0	0	0	0	0	0	0	0	0	0	0	0	0	1	0	0	0	0	0	0	1	0	0	0	1	0	0			0.0681818
TcyATC_144	0	0	0	0	0	0	0	0	0	0	0	0	0	0	0	0	0	0	0	0	0	0	0	0	0	0	0	1	0	0	0	0	0	0	0	0	0	0	0	1	1	0	0	0			0.0681818
TcyATC_161	0	0	0	0	0	0	0	0	0	0	0	0	0	0	0	0	0	0	0	0	0	0	1	1	0	1	0	0	0	0	0	0	0	0	0	0	0	0	0	0	0	0	0	0			0.0681818
TcyATC_164	0	0	0	0	0	0	0	0	0	0	0	0	0	0	0	0	0	0	0	0	0	0	0	0	0	0	0	0	0	0	0	0	1	0	0	0	1	0	1	0	0	0	0	0			0.0681818
TcyATT_003	0	0	0	0	0	0	0	0	0	0	0	0	0	1	0	0	0	0	0	0	0	1	1	0	0	0	0	0	0	0	0	0	0	0	0	0	0	0	0	0	0	0	0	0			0.0681818
TcyATT_023	0	0	1	0	0	0	0	0	0	0	0	0	0	0	0	0	0	0	0	0	0	0	0	0	0	0	1	0	0	0	0	0	0	0	0	0	0	0	0	0	0	0	0	1			0.0681818
TcyATT_058	0	0	0	0	0	0	0	0	0	0	0	0	0	0	0	0	0	0	0	0	0	0	0	0	0	0	0	0	0	1	0	0	0	0	0	0	0	0	0	0	1	1	0	0			0.0681818
TcyATT_066	0	0	0	0	0	0	0	0	0	0	0	0	0	0	0	0	0	0	0	0	0	0	0	0	0	0	0	0	0	1	0	0	0	0	0	0	0	0	0	0	0	1	1	0			0.0681818
TcyATT_067	0	0	0	0	0	0	0	0	0	0	0	0	0	0	0	0	0	0	0	0	0	0	0	0	0	0	0	0	0	0	0	0	1	0	0	0	0	0	1	0	1	0	0	0			0.0681818
TcyATT_072	0	0	1	0	0	0	0	0	0	0	0	0	0	0	0	0	0	0	0	0	0	0	0	0	0	0	0	0	0	0	0	0	0	0	0	0	0	0	0	0	1	0	0	1			0.0681818
TcyATT_080	0	0	0	0	0	0	0	0	0	0	0	0	0	0	0	0	0	0	0	0	0	0	1	0	0	0	0	0	0	0	0	0	1	0	0	0	0	0	0	0	0	0	1	0			0.0681818
TcyATT_103	0	0	0	0	0	0	0	0	0	0	0	0	0	0	0	0	1	0	0	0	0	0	0	0	1	0	0	0	0	0	0	0	1	0	0	0	0	0	0	0	0	0	0	0			0.0681818
TcyATT_104	0	0	0	0	0	0	0	0	0	0	0	0	0	0	0	0	0	0	1	0	0	0	0	1	0	1	0	0	0	0	0	0	0	0	0	0	0	0	0	0	0	0	0	0			0.0681818
TcyATT_108	0	0	0	0	0	0	0	0	0	0	0	0	0	0	0	0	0	0	0	0	0	0	0	0	1	0	0	0	0	0	0	1	0	0	0	0	0	1	0	0	0	0	0	0			0.0681818
TcyATT_109	0	0	0	0	0	0	0	0	0	0	0	0	0	0	0	0	1	0	0	1	0	0	0	0	0	0	0	0	0	0	0	0	0	0	0	0	0	1	0	0	0	0	0	0			0.0681818
TcyATT_120	0	0	0	0	0	0	0	0	0	0	0	0	0	0	0	0	0	0	0	0	0	0	0	0	0	0	0	0	0	1	0	0	0	1	0	0	0	0	1	0	0	0	0	0			0.0681818
TcyATT_121	0	0	0	1	0	0	0	0	0	0	0	0	0	0	0	0	0	0	0	0	0	0	0	0	1	0	0	0	0	0	0	0	0	0	0	0	0	0	0	0	0	0	0	1			0.0681818
TcyATT_125	0	0	0	0	0	0	0	0	0	0	0	0	0	0	0	0	0	0	0	0	0	0	0	0	1	0	0	0	0	0	0	0	0	0	0	0	0	0	1	0	0	0	0	1			0.0681818
TcyATT_128	0	0	0	0	0	0	0	0	0	0	0	0	0	0	0	0	0	0	0	1	0	0	0	0	0	0	0	0	0	0	0	0	0	0	0	0	0	0	0	0	0	1	1	0			0.0681818
TcyATT_152	0	0	0	0	0	0	0	0	0	0	0	0	0	0	0	0	0	0	0	0	0	0	0	0	0	0	0	0	0	0	0	0	0	0	1	0	0	0	0	1	1	0	0	0			0.0681818
TcyATT_158	0	0	0	0	0	0	0	0	0	0	0	0	1	0	0	0	0	0	0	0	0	0	0	0	0	0	0	0	0	0	0	0	0	0	0	0	0	0	0	0	0	1	1	0			0.0681818
TcyATC_022	0	0	0	0	0	1	0	0	0	0	0	0	0	0	0	0	0	0	0	0	0	0	0	0	0	0	0	0	0	0	0	0	0	0	0	0	0	0	0	1	0	1	1	0			0.0909091
TcyATC_031	0	0	0	0	0	0	0	0	0	0	0	0	0	0	0	0	0	0	0	0	1	0	0	0	1	0	0	0	1	0	0	0	0	0	0	0	0	0	0	0	0	1	0	0			0.0909091
TcyATC_038	0	0	0	0	0	0	0	0	0	0	1	0	0	0	0	1	0	0	1	0	0	0	0	1	0	0	0	0	0	0	0	0	0	0	0	0	0	0	0	0	0	0	0	0			0.0909091
TcyATC_049	0	0	0	0	0	0	0	0	0	0	0	0	0	0	0	0	0	0	0	0	0	0	0	0	0	0	0	0	0	1	0	0	0	0	0	0	0	0	1	0	0	1	0	1			0.0909091
TcyATC_087	0	0	0	0	0	0	0	0	0	0	0	0	0	0	0	0	0	0	0	0	0	0	0	0	0	0	0	0	0	0	0	0	0	0	0	0	0	0	0	1	1	1	1	0			0.0909091
TcyATC_112	0	0	0	0	0	0	0	0	0	0	0	0	0	0	0	0	0	0	0	0	1	0	0	0	0	0	0	1	1	0	0	0	0	0	0	0	0	0	1	0	0	0	0	0			0.0909091
TcyATC_115	0	0	0	0	0	0	0	0	1	0	0	1	0	0	0	0	0	0	0	0	0	0	0	0	0	0	0	0	0	0	0	0	0	0	0	0	0	0	1	0	0	0	1	0			0.0909091
TcyATC_127	0	0	0	0	0	1	0	0	0	1	0	0	0	0	0	0	0	0	0	0	0	0	0	1	1	0	0	0	0	0	0	0	0	0	0	0	0	0	0	0	0	0	0	0			0.0909091
TcyATC_163	0	0	0	0	1	0	0	1	0	0	0	0	1	0	0	0	1	0	0	0	0	0	0	0	0	0	0	0	0	0	0	0	0	0	0	0	0	0	0	0	0	0	0	0			0.0909091
TcyATC_167	0	0	0	0	0	0	0	0	0	0	0	0	0	0	0	0	0	0	0	0	0	0	0	0	0	0	0	0	0	0	0	0	0	0	0	0	0	0	0	1	1	1	1	0			0.0909091
TcyATT_001	0	0	0	0	0	0	0	0	0	0	0	0	0	0	0	0	0	0	0	0	0	0	0	0	0	0	0	0	0	0	0	0	0	0	0	0	0	0	0	1	1	1	1	0			0.0909091
TcyATT_018	0	0	0	0	0	0	0	0	0	0	0	0	0	0	0	0	0	0	0	0	0	0	0	0	0	0	0	0	0	0	0	0	0	0	0	0	0	0	0	1	1	1	1	0			0.0909091
TcyATT_022	0	0	0	0	0	0	0	0	0	0	0	0	0	0	0	0	0	0	0	0	0	0	0	1	0	0	0	0	0	0	0	0	0	0	0	0	0	1	0	1	0	0	1	0			0.0909091
TcyATT_044	1	0	0	1	0	0	0	0	0	0	0	1	0	0	0	0	0	0	0	0	0	0	0	0	0	0	0	0	0	0	0	0	0	0	1	0	0	0	0	0	0	0	0	0			0.0909091
TcyATT_055	0	0	0	0	0	0	0	0	0	0	0	0	0	0	0	0	0	0	0	0	0	0	0	0	0	0	0	0	1	0	0	0	0	1	0	0	0	0	0	1	0	1	0	0			0.0909091
TcyATT_112	0	0	0	0	0	0	0	0	0	0	0	0	0	0	0	0	0	0	0	0	0	0	0	0	0	0	0	0	0	0	0	0	0	0	0	0	0	0	0	1	1	1	1	0			0.0909091
TcyATT_122	0	0	0	0	0	0	0	0	0	0	0	0	0	0	0	0	0	0	0	0	0	0	0	0	0	0	0	0	0	0	0	1	0	0	0	1	1	1	0	0	0	0	0	0			0.0909091
TcyATT_129	0	0	0	0	0	0	0	0	0	0	0	0	0	0	0	0	0	0	0	0	0	0	0	0	0	0	0	0	0	1	1	0	0	1	1	0	0	0	0	0	0	0	0	0			0.0909091
TcyATC_011	0	0	0	0	0	0	0	0	0	0	0	0	0	0	0	0	0	0	0	0	0	0	0	0	0	0	0	1	0	0	0	1	1	0	0	1	0	0	0	1	0	0	0	0			0.113636
TcyATC_017	0	0	0	0	0	0	0	0	0	0	0	0	0	0	0	0	0	0	0	0	0	0	0	0	0	0	0	0	0	0	1	0	0	0	1	0	0	0	0	0	1	1	1	0			0.113636
TcyATC_023	0	0	0	0	0	0	0	0	1	0	0	1	0	0	0	0	0	0	0	0	1	0	0	0	0	0	0	0	0	0	0	0	0	0	0	0	0	0	0	0	0	1	0	1			0.113636
TcyATC_046	0	0	0	0	0	0	0	0	0	0	0	0	0	0	0	0	0	0	0	0	1	0	0	0	1	0	0	0	0	1	1	0	1	0	0	0	0	0	0	0	0	0	0	0			0.113636
TcyATC_075	0	0	0	0	0	0	0	0	0	0	1	0	0	0	0	1	0	0	0	0	0	0	0	0	0	0	0	1	0	1	0	0	0	0	0	0	0	0	0	0	0	0	1	0			0.113636
TcyATC_076	0	0	0	0	0	0	0	0	0	0	0	0	0	0	0	0	0	0	0	0	0	0	0	0	0	0	0	0	1	0	1	0	1	1	0	1	0	0	0	0	0	0	0	0			0.113636
TcyATC_098	0	0	0	0	0	0	0	0	0	0	0	0	0	0	0	0	0	0	0	0	0	0	0	0	0	0	0	0	0	0	0	0	0	0	0	1	0	1	0	0	1	0	1	1			0.113636
TcyATC_106	0	0	0	0	0	0	0	0	0	0	1	0	0	0	0	0	0	0	0	0	0	0	0	0	0	0	1	1	0	0	0	0	1	0	0	0	0	0	0	0	0	1	0	0			0.113636
TcyATC_125	0	0	0	0	0	0	0	0	0	0	0	0	0	0	0	0	0	0	0	0	0	0	0	0	0	0	0	0	0	0	0	0	1	1	0	1	0	1	0	0	0	0	0	1			0.113636
TcyATC_129	0	0	0	0	0	0	0	0	0	0	0	0	0	0	0	0	0	0	0	0	0	0	0	0	0	0	1	1	0	0	0	0	0	0	0	1	0	1	0	0	0	0	0	1			0.113636
TcyATC_132	0	0	0	0	0	0	0	0	0	0	0	0	0	0	0	0	0	0	0	0	0	0	0	1	0	0	0	1	0	0	0	1	0	0	0	0	0	0	0	1	0	0	1	0			0.113636
TcyATC_136	0	0	0	0	0	0	0	0	0	0	1	0	0	0	0	1	0	0	0	0	0	0	0	0	0	0	0	0	0	0	1	0	1	1	0	0	0	0	0	0	0	0	0	0			0.113636
TcyATC_158	0	0	0	0	0	0	0	0	0	0	0	0	0	0	0	0	0	0	0	0	0	0	0	0	0	0	0	0	0	0	0	1	0	1	0	1	1	1	0	0	0	0	0	0			0.113636
TcyATT_053	0	0	0	0	0	0	0	0	0	0	0	0	0	0	0	0	0	0	0	0	0	0	0	0	1	0	0	0	0	0	0	1	0	0	1	0	1	1	0	0	0	0	0	0			0.113636
TcyATT_059	0	0	0	0	0	1	0	0	0	1	0	0	0	0	0	0	0	0	0	0	0	0	1	0	0	0	1	0	0	0	0	0	0	0	0	0	0	0	1	0	0	0	0	0			0.113636
TcyATT_061	1	1	0	0	0	0	0	0	0	0	0	0	0	0	0	0	0	0	0	0	0	0	0	0	1	0	0	1	0	0	0	0	0	0	0	0	0	0	0	1	0	0	0	0			0.113636
TcyATT_091	0	0	1	0	1	0	0	0	0	0	1	0	0	0	0	0	0	0	0	0	0	0	0	0	0	0	1	0	0	0	0	0	0	0	0	0	0	0	0	0	0	1	0	0			0.113636
TcyATT_100	0	0	0	0	0	0	0	0	0	0	0	0	0	0	0	0	0	0	0	0	0	0	0	0	0	0	0	0	0	0	1	0	0	1	1	0	1	0	0	0	1	0	0	0			0.113636
TcyATT_123	0	0	0	0	0	0	0	0	0	0	0	0	0	0	0	0	0	0	0	1	1	0	0	0	0	0	1	0	0	1	0	1	0	0	0	0	0	0	0	0	0	0	0	0			0.113636
TcyATT_132	1	0	0	0	0	0	0	0	1	0	1	0	0	0	0	0	0	0	1	0	0	0	0	0	0	0	0	0	0	0	0	0	0	0	0	0	0	0	0	0	0	0	0	1			0.113636
TcyATT_151	0	0	0	0	0	0	0	0	1	0	0	0	0	0	0	0	0	0	0	0	0	0	0	0	0	0	0	0	0	0	0	0	0	0	0	0	0	0	0	1	1	1	1	0			0.113636
TcyATT_157	0	0	0	0	0	0	0	0	0	0	0	0	0	0	0	0	0	0	0	0	0	0	0	0	0	0	0	0	0	0	0	0	1	0	0	0	0	0	1	0	1	1	1	0			0.113636
TcyATC_012	0	0	0	0	0	0	0	0	0	0	0	0	0	0	0	0	0	0	0	0	0	1	1	1	0	1	0	1	0	1	0	0	0	0	0	0	0	0	0	0	0	0	0	0			0.136364
TcyATC_024	1	0	0	0	1	0	0	1	0	0	0	0	0	0	0	0	1	0	0	0	0	0	0	0	1	0	0	1	0	0	0	0	0	0	0	0	0	0	0	0	0	0	0	0			0.136364
TcyATC_066	0	0	0	0	0	0	0	0	0	0	0	0	0	0	0	0	0	0	0	0	0	1	0	0	0	0	0	1	0	0	0	1	0	0	1	1	0	0	1	0	0	0	0	0			0.136364
TcyATC_068	0	0	0	0	0	0	0	0	0	0	0	0	0	0	0	0	0	0	0	0	0	0	0	1	0	1	1	0	1	1	0	0	0	1	0	0	0	0	0	0	0	0	0	0			0.136364
TcyATC_080	1	1	0	0	0	0	0	0	0	0	0	1	0	0	0	0	0	1	0	0	0	0	0	0	1	0	0	0	1	0	0	0	0	0	0	0	0	0	0	0	0	0	0	0			0.136364
TcyATC_091	0	0	0	0	0	0	0	0	0	0	0	0	0	0	0	0	0	0	0	0	0	0	0	0	0	0	0	0	1	0	0	0	0	1	0	1	1	1	1	0	0	0	0	0			0.136364
TcyATC_097	0	0	0	0	0	0	0	0	0	0	0	0	0	0	0	1	0	0	0	0	0	1	0	0	0	0	0	0	0	0	0	0	1	1	0	1	0	0	1	0	0	0	0	0			0.136364
TcyATC_099	0	0	0	0	0	0	0	0	0	0	0	0	0	0	0	0	0	0	0	0	0	0	0	0	0	0	0	0	0	0	0	1	1	0	1	0	1	1	1	0	0	0	0	0			0.136364
TcyATC_117	0	0	0	0	0	0	0	0	0	0	0	0	0	0	0	0	0	0	0	0	0	0	0	0	0	0	1	0	1	0	0	1	0	0	0	1	0	1	0	0	1	0	0	0			0.136364
TcyATC_119	0	0	0	0	0	0	0	0	0	0	0	0	0	0	0	0	0	0	0	0	0	0	0	0	0	0	0	0	0	1	1	0	1	1	0	0	0	0	1	0	0	0	1	0			0.136364
TcyATC_138	0	0	0	0	0	0	0	0	0	0	0	0	0	0	0	0	0	0	0	0	0	0	0	0	0	0	1	0	0	0	0	1	0	0	0	1	1	1	0	1	0	0	0	0			0.136364
TcyATT_006	1	0	0	0	0	0	0	1	0	0	0	0	1	0	0	0	1	0	0	0	0	0	0	0	0	0	1	0	0	0	0	0	0	0	0	0	0	0	0	0	0	0	1	0			0.136364
TcyATT_032	1	1	1	0	0	0	0	0	0	1	0	0	0	0	0	0	0	0	0	0	0	0	1	1	0	0	0	0	0	0	0	0	0	0	0	0	0	0	0	0	0	0	0	0			0.136364
TcyATT_035	0	0	0	0	0	0	1	0	1	1	0	0	0	0	0	0	0	0	0	1	1	0	0	0	0	0	0	1	0	0	0	0	0	0	0	0	0	0	0	0	0	0	0	0			0.136364
TcyATT_063	0	0	0	0	0	0	0	0	0	0	0	0	0	0	0	0	0	0	0	0	1	0	0	0	1	0	1	0	1	0	0	0	1	0	1	0	0	0	0	0	0	0	0	0			0.136364
TcyATT_070	0	0	0	0	0	0	0	0	0	0	0	0	0	0	0	0	0	0	0	0	1	0	0	0	0	0	1	0	0	0	0	0	0	0	1	0	0	0	0	1	1	1	0	0			0.136364
TcyATT_076	0	1	1	0	0	0	0	0	0	0	0	0	0	1	1	0	0	0	0	1	0	0	0	0	0	0	1	0	0	0	0	0	0	0	0	0	0	0	0	0	0	0	0	0			0.136364
TcyATT_089	0	0	0	0	0	0	0	0	0	0	0	0	0	0	0	0	0	0	0	0	0	0	0	0	0	0	0	1	0	0	0	0	0	0	0	1	1	0	0	0	1	1	0	1			0.136364
TcyATT_107	0	0	0	0	0	0	0	0	0	0	1	0	0	0	0	1	0	0	0	0	0	1	0	0	0	0	1	0	0	0	0	0	0	0	1	0	0	0	0	0	0	1	0	0			0.136364
TcyATT_113	0	0	0	0	0	0	0	0	0	0	0	0	0	0	0	0	0	0	0	0	0	0	0	0	1	0	0	0	0	1	0	1	0	0	0	1	1	1	0	0	0	0	0	0			0.136364
TcyATC_042	0	0	0	0	0	0	0	0	0	0	0	0	0	0	0	0	0	0	0	0	0	0	0	1	0	0	0	0	0	0	1	0	1	0	0	0	0	0	1	0	0	1	1	1			0.159091
TcyATC_043	0	0	0	0	0	0	0	0	0	0	0	0	0	0	0	0	0	0	0	0	0	0	0	0	0	0	0	0	0	1	0	1	0	0	0	1	1	1	0	1	1	0	0	0			0.159091
TcyATC_061	0	0	0	0	0	0	0	0	0	0	0	0	1	0	0	0	0	0	1	0	0	0	0	1	0	1	0	0	0	0	1	0	0	0	0	1	0	0	0	0	0	0	1	0			0.159091
TcyATC_089	0	0	0	0	0	0	0	0	0	0	0	0	0	0	0	0	0	0	0	0	0	0	0	0	0	0	0	1	0	1	0	0	0	0	1	0	0	0	0	1	1	1	1	0			0.159091
TcyATC_090	0	0	0	0	0	0	0	1	1	0	0	0	0	0	0	0	0	0	0	0	0	0	0	0	0	0	0	1	0	0	0	0	0	0	0	0	0	0	0	1	1	1	1	0			0.159091
TcyATC_103	0	0	0	0	0	0	0	0	0	0	0	0	0	0	0	0	0	0	0	0	0	0	0	0	1	0	0	0	1	1	0	0	1	0	1	0	0	0	1	0	0	0	0	1			0.159091
TcyATC_128	1	0	0	0	1	0	0	1	0	0	0	0	0	0	1	0	1	0	0	0	0	0	0	0	0	0	1	0	0	1	0	0	0	0	0	0	0	0	0	0	0	0	0	0			0.159091
TcyATC_140	0	0	0	0	0	0	0	0	1	0	0	0	0	1	1	0	0	0	0	0	0	0	1	0	0	1	0	0	0	0	0	0	0	1	0	0	0	0	0	0	0	0	1	0			0.159091
TcyATC_153	0	0	0	0	0	0	0	0	0	0	0	0	0	0	0	0	0	0	0	0	0	0	0	0	0	0	1	0	0	0	0	1	0	0	1	1	1	1	0	0	0	1	0	0			0.159091
TcyATT_010	0	0	0	0	0	0	0	0	0	0	0	1	0	0	0	0	0	0	0	0	0	0	0	0	0	0	0	1	0	0	0	1	0	0	0	1	1	1	0	0	1	0	0	0			0.159091
TcyATT_081	0	0	0	0	0	0	0	0	0	0	0	0	0	0	0	1	0	0	0	0	0	0	0	0	0	0	0	0	0	1	1	0	1	1	1	0	0	0	1	0	0	0	0	0			0.159091
TcyATT_101	0	0	1	0	0	0	0	0	0	1	0	0	0	0	0	0	0	0	0	1	0	0	0	0	1	0	0	0	0	0	0	0	0	0	0	0	0	0	0	0	1	1	1	0			0.159091
TcyATT_131	0	0	0	0	0	0	0	1	0	0	0	0	0	0	0	0	1	0	0	0	0	0	0	0	0	0	0	1	0	0	0	0	0	0	0	0	0	0	0	1	1	1	1	0			0.159091
TcyATT_156	0	0	0	0	0	0	0	0	1	0	0	0	0	0	0	0	0	0	0	0	1	0	1	0	0	0	0	0	0	0	0	1	0	0	0	0	1	1	0	0	0	0	1	0			0.159091
TcyATC_025	0	0	1	0	0	0	1	1	0	1	0	0	1	0	0	0	1	0	0	1	0	0	0	0	0	0	0	0	0	0	0	0	0	0	0	0	0	0	0	0	0	0	0	1			0.181818
TcyATC_029	1	1	0	0	0	0	0	1	0	0	0	1	0	0	0	0	1	0	0	0	0	0	0	0	1	0	0	1	0	0	0	0	0	0	0	0	0	0	0	0	0	1	0	0			0.181818
TcyATC_039	1	0	0	0	0	0	0	0	0	0	0	0	0	0	0	1	0	0	0	1	0	0	0	1	1	1	0	1	0	0	0	0	0	0	0	0	0	0	0	0	1	0	0	0			0.181818
TcyATC_051	0	0	0	0	0	0	0	0	0	0	0	1	0	1	1	0	0	0	0	1	1	0	0	0	0	0	0	1	0	1	0	0	0	0	0	0	0	0	0	0	1	0	0	0			0.181818
TcyATC_092	1	0	1	0	0	1	0	1	1	0	0	1	0	0	0	0	0	0	0	1	0	0	0	0	0	0	0	0	0	0	0	0	0	0	0	0	0	0	0	0	0	0	0	1			0.181818
TcyATC_124	0	0	0	0	1	0	0	1	0	0	0	0	1	0	0	0	1	0	0	0	0	0	1	0	0	0	0	0	1	0	0	1	0	0	0	0	0	0	1	0	0	0	0	0			0.181818
TcyATC_131	0	0	0	0	0	0	1	1	0	0	0	0	0	0	0	0	0	0	1	0	0	0	0	1	0	1	0	0	0	0	0	0	0	0	0	0	0	0	0	1	1	0	1	0			0.181818
TcyATC_142	0	0	0	0	1	0	0	1	0	0	0	0	1	0	0	0	1	0	1	0	0	0	0	0	0	0	1	0	0	1	0	0	0	0	0	0	0	0	0	0	0	0	0	1			0.181818
TcyATT_007	0	0	0	0	0	0	0	0	0	0	0	0	0	0	0	0	0	1	1	0	0	0	0	0	0	1	0	1	0	0	0	1	0	0	0	0	1	1	1	0	0	0	0	0			0.181818
TcyATT_024	1	0	0	0	0	1	0	1	0	0	1	1	1	0	0	0	0	0	0	0	0	0	0	0	0	0	0	0	0	0	0	0	0	0	0	0	0	0	0	0	0	1	1	0			0.181818
TcyATT_038	1	1	0	0	0	0	0	1	0	0	0	0	0	0	0	0	1	0	0	0	0	0	0	0	0	0	0	0	0	0	0	1	0	0	1	0	0	0	1	0	1	0	0	0			0.181818
TcyATT_093	1	0	1	0	0	0	0	0	1	0	0	0	0	0	0	0	1	0	0	0	1	0	0	1	1	1	0	0	0	0	0	0	0	0	0	0	0	0	0	0	0	0	0	0			0.181818
TcyATT_105	0	0	1	0	1	0	1	1	0	1	0	0	0	0	0	0	0	0	0	1	0	0	0	0	0	0	1	0	0	0	0	0	0	0	0	0	0	0	0	0	0	0	0	1			0.181818
TcyATT_106	0	0	0	0	0	0	0	0	0	0	0	0	0	0	0	0	1	0	0	0	0	0	0	1	1	0	0	0	0	0	0	1	1	0	0	1	0	1	0	0	0	0	0	1			0.181818
TcyATC_019	0	1	0	0	0	0	0	0	0	0	0	0	0	0	0	0	0	0	0	0	0	0	0	0	0	0	0	1	1	0	1	0	1	1	1	0	0	0	1	0	0	0	1	0			0.204545
TcyATC_053	0	1	0	0	0	0	0	0	0	0	0	0	0	1	1	0	0	1	0	0	0	0	0	0	0	0	1	0	0	1	0	0	0	0	0	0	0	0	0	1	1	0	1	0			0.204545
TcyATC_059	0	0	0	0	0	0	0	0	0	0	0	0	0	0	0	0	1	1	0	0	1	0	0	0	0	0	1	0	1	0	1	0	0	1	0	0	0	0	0	0	0	1	0	1			0.204545
TcyATC_077	0	0	0	0	1	1	0	0	0	0	0	1	1	0	0	0	0	0	0	1	0	0	0	0	0	0	1	0	0	0	0	1	0	0	0	0	0	1	1	0	0	0	0	0			0.204545
TcyATC_101	0	0	0	0	0	0	0	0	0	0	0	0	0	1	1	0	0	0	1	0	1	0	1	0	0	1	0	0	0	1	0	0	0	0	0	0	0	0	0	1	1	0	0	0			0.204545
TcyATC_126	1	0	0	1	1	0	0	1	0	0	0	0	0	0	0	0	1	0	0	0	0	0	0	0	1	0	0	0	1	0	0	0	1	0	0	0	0	0	0	0	0	0	0	1			0.204545
TcyATT_046	0	0	0	0	0	0	0	0	0	0	0	0	1	0	0	1	0	0	0	0	0	0	0	0	0	0	0	0	1	0	1	0	0	1	1	0	0	1	0	0	0	1	0	1			0.204545
TcyATT_048	0	0	0	0	0	0	0	0	0	0	0	1	0	0	0	0	0	0	0	1	0	0	0	0	0	0	1	1	0	1	0	1	0	0	0	0	1	1	0	0	0	0	0	1			0.204545
TcyATT_068	0	0	0	0	0	0	0	0	0	0	0	0	0	0	0	0	0	0	0	0	0	0	0	0	0	0	0	0	0	0	0	1	1	0	1	1	1	1	1	1	1	0	0	0			0.204545
TcyATT_082	0	0	1	0	0	0	1	0	1	0	0	0	0	0	0	0	0	0	0	0	1	0	0	0	1	0	0	0	0	1	0	0	1	0	0	0	0	0	0	0	0	1	1	0			0.204545
TcyATT_102	0	1	1	0	1	0	0	1	0	1	0	0	0	0	0	0	1	0	0	1	0	0	0	0	0	0	1	0	0	0	0	0	0	0	0	0	0	0	0	0	0	0	0	1			0.204545
TcyATT_124	0	0	0	1	0	0	1	0	0	0	0	0	0	0	0	0	0	0	0	1	0	1	0	0	1	0	0	0	0	0	0	1	0	0	0	1	0	1	0	0	0	1	0	0			0.204545
TcyATT_139	0	0	0	1	0	0	0	0	0	1	0	0	1	0	0	0	0	0	0	0	0	1	0	1	0	1	1	0	0	1	0	0	0	0	0	0	0	0	0	0	0	0	1	0			0.204545
TcyATC_015	0	0	0	0	0	0	0	0	0	0	0	1	0	0	0	0	0	0	0	0	0	0	0	0	0	0	0	0	0	0	1	1	1	1	0	1	1	1	0	0	1	0	1	0			0.227273
TcyATC_072	0	0	0	0	0	0	0	0	0	0	0	0	0	0	0	0	0	1	0	0	0	0	0	0	0	0	0	0	0	0	1	1	1	1	0	1	1	1	1	0	1	0	0	0			0.227273
TcyATC_093	0	0	0	0	0	0	0	0	0	0	0	0	0	0	0	0	0	0	0	0	0	0	0	0	0	0	1	0	1	0	1	1	1	1	0	0	1	1	1	0	0	0	0	1			0.227273
TcyATC_102	0	1	0	0	1	1	0	0	1	0	0	0	1	0	0	0	0	0	0	1	0	0	0	0	0	0	0	0	0	0	1	0	0	1	0	0	0	0	1	0	1	0	0	0			0.227273
TcyATC_107	0	0	0	0	0	0	0	0	0	0	0	0	0	0	0	0	0	0	0	0	0	0	0	0	0	0	0	0	0	0	0	1	0	0	1	1	1	1	0	1	1	1	1	1			0.227273
TcyATT_009	0	0	0	0	0	0	0	0	0	0	0	1	0	0	0	0	0	0	0	0	0	0	0	0	0	0	0	0	1	0	1	1	1	1	0	1	0	1	1	1	0	0	0	0			0.227273
TcyATT_034	1	1	0	1	0	0	0	0	1	0	0	0	0	0	0	0	0	1	0	0	1	0	0	1	0	0	0	0	0	0	0	0	0	0	0	0	0	0	0	0	1	1	1	0			0.227273
TcyATT_075	1	1	0	0	0	0	0	0	0	0	0	0	0	0	0	1	0	0	1	0	0	1	0	1	0	0	0	0	0	1	1	0	1	1	0	0	0	0	0	0	0	0	0	0			0.227273
TcyATC_036	0	0	0	0	1	0	0	0	0	0	0	0	0	0	0	0	0	0	0	0	0	0	1	0	0	0	1	0	0	0	1	1	1	1	0	1	1	1	1	0	0	0	0	0			0.25
TcyATC_085	0	0	1	0	0	0	1	1	0	0	0	0	1	0	0	1	0	0	0	0	0	0	0	0	0	0	0	1	0	0	0	0	0	0	0	1	1	1	0	1	0	1	0	0			0.25
TcyATC_122	0	0	0	0	0	0	0	0	1	0	0	0	1	0	0	0	0	0	0	0	1	0	1	1	0	1	1	0	1	1	0	0	0	0	0	1	0	0	0	0	0	1	0	0			0.25
TcyATC_160	1	0	0	1	0	0	0	0	1	0	1	0	0	1	1	0	0	0	0	1	0	0	0	0	1	0	0	0	1	0	0	0	0	1	0	0	0	0	1	0	0	0	0	0			0.25
TcyATT_078	0	1	0	1	0	0	0	0	0	1	1	0	1	0	0	0	1	0	0	1	0	0	1	0	1	0	1	0	0	0	0	0	0	0	0	0	0	0	0	0	0	0	1	0			0.25
TcyATT_140	0	0	0	0	0	0	1	0	0	0	0	0	0	0	0	0	0	0	0	1	0	0	0	0	1	0	0	0	1	1	1	1	1	0	0	1	1	1	0	0	0	0	0	0			0.25
TcyATT_141	0	1	1	1	0	1	1	0	0	0	0	0	0	1	1	0	0	0	1	1	1	0	1	0	0	0	0	0	0	0	0	0	0	0	0	0	0	0	0	0	0	0	0	0			0.25
TcyATT_149	0	0	0	0	0	0	0	0	1	0	1	0	0	1	1	0	0	1	0	0	0	1	0	1	1	0	0	1	0	0	0	0	1	0	0	0	0	0	0	0	0	0	0	1			0.25
TcyATC_001	0	0	0	0	0	0	0	0	0	0	0	0	0	0	0	1	0	0	0	0	0	0	0	1	0	0	0	0	1	1	1	1	1	1	0	0	0	0	0	1	1	1	1	0			0.272727
TcyATC_008	1	0	0	0	0	0	0	0	0	0	1	0	1	1	1	1	0	1	1	0	0	0	0	1	0	1	0	1	0	0	0	0	0	0	1	0	0	0	0	0	0	0	0	0			0.272727
TcyATC_028	0	0	0	0	0	0	0	0	0	0	0	0	0	1	1	0	0	1	1	0	0	1	1	1	0	1	1	0	0	0	0	1	0	0	0	0	0	0	0	1	1	0	0	0			0.272727
TcyATC_037	0	0	0	0	0	0	0	0	1	0	0	0	0	1	1	1	0	1	0	0	1	1	0	1	0	1	0	0	0	0	0	0	0	0	1	0	0	0	0	0	1	0	0	1			0.272727
TcyATC_045	0	1	1	1	0	0	1	0	0	1	0	0	1	0	0	0	0	0	0	1	0	0	0	0	0	0	0	0	0	0	0	0	0	0	0	0	1	0	1	1	0	1	1	0			0.272727
TcyATC_054	0	0	0	0	0	0	0	0	0	0	0	0	0	0	0	0	0	0	0	0	0	0	0	0	0	0	0	0	0	0	1	1	1	1	1	1	1	0	1	1	0	1	1	1			0.272727
TcyATC_069	1	1	1	1	0	1	0	1	1	1	0	1	0	1	0	1	0	0	0	0	0	0	0	0	1	0	0	0	0	0	0	0	0	0	0	0	0	0	0	0	0	0	0	0			0.272727
TcyATC_157	1	0	0	0	1	0	0	1	0	0	0	0	1	0	0	0	0	0	0	0	1	0	0	0	1	0	0	1	0	0	0	0	0	0	1	0	0	0	0	1	1	0	1	1			0.272727
TcyATT_033	0	0	0	0	0	0	0	0	0	0	0	0	0	0	0	0	0	0	1	0	0	1	1	0	0	0	1	0	1	0	1	1	0	1	0	0	0	0	1	1	0	1	0	1			0.272727
TcyATT_069	0	0	0	0	0	0	0	0	0	0	0	0	0	1	0	1	0	0	0	0	1	0	1	1	0	1	0	0	0	0	0	0	0	0	1	0	0	0	0	1	1	1	1	1			0.272727
TcyATT_119	0	0	0	1	1	0	0	1	0	1	0	1	1	1	0	0	0	0	1	1	0	0	0	1	0	1	0	0	0	0	0	0	0	0	0	0	0	0	1	0	0	0	0	0			0.272727
TcyATT_147	1	1	0	0	0	1	0	1	1	0	0	0	1	0	0	0	1	0	0	0	0	0	0	0	1	0	1	0	1	0	0	0	0	0	0	1	0	0	0	0	0	0	0	1			0.272727
TcyATC_130	0	1	1	0	0	1	0	0	1	0	1	0	0	0	0	1	0	0	0	1	1	0	0	0	1	0	1	0	0	0	0	0	0	0	1	0	0	0	0	1	0	1	0	0			0.295455
TcyATT_021	0	0	1	1	1	0	0	1	0	0	1	1	0	0	0	0	1	0	0	1	0	0	0	0	0	0	1	0	0	0	0	0	0	1	0	0	0	0	0	1	1	1	0	0			0.295455
TcyATT_052	0	0	0	0	1	0	0	1	0	0	0	0	1	0	0	1	1	0	0	0	0	0	1	1	1	1	0	0	0	0	0	0	1	1	0	0	0	0	0	0	1	0	1	0			0.295455
TcyATT_060	1	0	0	0	1	0	0	1	0	0	0	0	1	1	1	0	1	1	1	0	0	0	0	1	0	0	0	1	0	0	0	0	0	1	0	0	0	1	0	0	0	0	0	0			0.295455
TcyATT_134	0	0	0	0	0	0	1	0	1	0	0	0	0	1	1	0	0	0	0	0	0	0	1	0	0	0	0	0	0	0	1	1	0	1	0	1	1	1	1	0	1	0	0	0			0.295455
TcyATC_003	0	1	0	0	1	1	1	1	0	1	0	0	1	0	0	0	0	0	0	0	0	0	0	0	1	0	0	0	0	0	0	1	0	0	1	0	1	1	0	1	1	0	0	0			0.318182
TcyATC_026	0	1	0	0	0	0	0	1	0	0	0	1	0	1	1	0	0	0	1	0	0	0	1	1	0	1	0	1	0	1	0	1	0	0	0	0	1	1	0	0	0	0	0	0			0.318182
TcyATC_063	1	0	0	0	1	0	0	1	0	0	0	0	1	0	0	0	0	0	0	0	1	0	0	0	1	0	0	0	0	0	1	1	0	1	1	1	1	1	1	0	0	0	0	0			0.318182
TcyATT_002	1	0	0	0	0	0	0	0	0	1	1	0	0	1	1	0	0	1	0	0	0	1	1	0	0	0	0	0	1	1	0	1	0	0	0	1	1	1	0	0	0	0	0	0			0.318182
TcyATT_041	0	1	1	0	0	0	1	0	1	1	1	0	0	1	1	0	0	0	0	0	1	0	0	1	0	0	1	0	1	0	0	0	0	1	0	0	0	0	1	0	0	0	0	0			0.318182
TcyATT_077	1	1	0	1	1	0	0	1	0	1	1	0	1	1	0	0	1	0	0	0	0	1	1	0	0	0	0	0	0	0	1	0	0	1	0	0	0	0	0	0	0	0	0	0			0.318182
TcyATT_117	0	0	1	0	0	0	1	0	0	0	0	0	0	1	0	0	0	0	1	0	0	0	0	1	0	1	0	0	0	0	1	1	1	1	1	1	0	0	1	1	0	0	0	0			0.318182
TcyATC_050	1	0	0	0	0	0	0	0	1	0	1	1	0	1	1	1	0	1	1	0	1	1	0	0	0	0	0	0	1	0	0	0	0	1	0	1	1	0	0	0	0	0	0	0			0.340909
TcyATC_150	1	1	1	0	1	1	1	0	1	1	0	1	0	0	0	0	0	0	0	1	0	0	0	0	1	0	1	0	1	0	0	0	0	0	0	0	0	0	0	0	0	0	1	1			0.340909
TcyATT_012	0	1	1	1	0	1	1	0	0	1	1	1	1	0	0	0	0	0	0	0	0	0	0	0	1	0	0	0	0	0	0	1	0	0	0	1	1	1	0	1	0	0	0	0			0.340909
TcyATT_049	1	0	0	0	1	0	0	1	0	0	0	0	0	0	0	0	0	0	0	0	0	0	0	0	1	0	1	0	0	0	1	1	0	1	0	0	1	1	1	1	0	1	1	1			0.340909
TcyATC_021	0	0	0	0	0	0	1	0	0	0	1	0	1	1	1	1	0	1	1	0	1	1	0	0	0	1	0	0	0	0	0	1	0	0	0	1	1	1	0	0	0	0	0	1			0.363636
TcyATC_048	1	1	0	0	0	1	0	0	0	1	0	1	0	0	0	1	0	0	0	1	0	0	0	1	0	0	0	0	1	0	0	1	1	0	0	1	1	1	1	1	0	0	0	0			0.363636
TcyATC_094	1	1	1	1	1	1	0	1	1	1	1	0	1	0	0	0	1	0	0	1	1	1	0	0	0	0	0	0	1	0	0	0	0	0	0	0	0	0	0	0	0	0	0	0			0.363636
TcyATT_015	0	0	0	0	0	0	0	0	1	0	0	0	1	0	0	0	0	0	0	0	1	0	0	0	1	0	0	0	1	0	0	1	1	1	0	1	1	1	1	1	1	0	1	1			0.363636
TcyATT_042	1	1	0	0	0	0	0	0	0	0	0	0	0	1	1	1	0	1	1	0	1	1	1	1	0	1	0	0	0	0	0	0	0	0	1	0	0	0	0	1	1	0	0	1			0.363636
TcyATT_050	0	0	0	0	0	0	0	0	1	0	0	0	1	1	1	0	0	0	0	1	0	0	1	0	1	0	1	0	0	0	1	1	0	0	0	1	0	1	0	1	0	1	1	1			0.363636
TcyATT_099	0	0	0	0	0	1	1	0	0	1	0	0	0	1	1	0	0	1	1	0	1	1	1	1	0	0	0	0	0	0	0	1	1	0	1	1	1	0	0	0	0	0	0	0			0.363636
TcyATT_130	1	1	0	0	0	0	0	1	1	0	1	0	0	1	1	0	1	0	1	0	0	0	1	0	1	0	0	1	0	1	0	1	0	0	1	0	0	0	0	0	0	1	0	0			0.363636
TcyATC_034	1	0	0	1	1	1	1	1	1	0	1	0	0	1	1	1	1	0	1	1	1	0	0	1	0	1	0	0	0	0	0	0	0	0	0	0	0	0	0	0	0	0	0	0			0.386364
TcyATT_043	0	1	1	1	1	1	1	1	0	1	1	0	0	0	0	0	0	0	0	1	0	0	0	0	0	0	1	0	1	0	0	0	0	1	1	1	0	1	1	0	0	0	0	0			0.386364
TcyATC_002	1	1	1	1	1	1	1	0	1	1	0	1	1	0	0	1	0	0	0	1	0	0	0	0	1	0	1	1	1	0	0	0	0	0	0	0	0	0	0	0	0	1	0	0			0.409091
TcyATC_067	1	0	1	0	1	1	0	1	1	1	1	1	1	1	1	0	0	0	0	1	1	1	0	0	1	0	0	0	0	1	0	0	1	0	0	0	0	0	0	0	0	0	0	0			0.409091
TcyATT_005	1	1	1	1	1	1	1	1	1	1	0	1	1	0	0	0	1	0	0	1	1	0	0	0	1	0	0	0	0	0	0	0	0	0	0	0	0	0	0	0	0	1	1	0			0.409091
TcyATT_031	1	0	1	1	1	1	1	1	1	1	1	1	0	0	0	0	0	1	0	0	1	0	0	0	1	0	1	0	1	0	1	0	0	1	0	0	0	0	0	0	0	0	0	0			0.409091
TcyATC_020	0	1	1	0	1	0	1	1	1	0	1	1	0	1	1	0	0	0	0	1	0	1	0	0	0	0	0	0	0	0	1	1	1	0	1	1	1	1	0	0	0	0	0	0			0.431818
TcyATT_014	1	1	1	1	1	1	1	1	0	1	1	1	1	0	0	1	1	0	1	1	0	0	0	0	0	0	1	0	0	0	0	0	0	0	1	0	0	0	0	1	0	0	0	0			0.431818
TcyATT_016	0	1	1	1	0	1	1	0	1	1	0	1	1	1	1	0	0	1	0	0	1	1	1	1	0	1	1	0	1	0	0	0	0	0	0	0	0	0	0	0	0	0	0	0			0.431818
TcyATT_027	0	1	0	1	1	1	0	0	0	1	0	0	0	0	0	0	0	0	0	1	1	0	0	0	1	0	1	0	1	1	0	1	1	0	1	1	1	0	1	0	1	0	0	1			0.431818
TcyATT_065	1	0	1	1	0	1	0	0	0	0	1	1	1	1	1	0	0	1	1	1	0	0	1	1	1	1	0	0	0	1	1	0	0	0	0	0	0	0	0	0	0	0	0	1			0.431818
TcyATT_088	0	0	1	1	0	1	1	0	1	1	1	0	0	1	1	0	0	1	0	0	1	1	0	0	0	0	0	0	1	1	0	0	0	0	0	1	1	0	1	1	0	0	0	1			0.431818
TcyATT_136	1	1	0	0	0	0	0	0	1	0	1	0	0	1	1	1	0	1	1	0	1	1	1	1	0	1	1	1	1	0	1	0	0	1	0	0	0	0	0	0	0	0	0	0			0.431818
TcyATC_030	0	0	0	0	1	0	1	1	0	0	0	0	1	1	1	0	0	1	1	0	0	0	1	1	0	1	1	0	0	0	1	0	1	1	1	0	1	0	0	1	0	0	1	1			0.454545
TcyATC_044	1	1	1	1	1	1	1	1	1	1	1	1	1	0	0	1	1	0	0	1	1	0	0	0	1	0	1	0	0	0	0	1	0	0	0	0	0	0	0	0	0	0	0	0			0.454545
TcyATC_070	1	1	0	1	0	1	1	1	0	0	1	0	1	1	1	1	1	1	0	0	1	1	1	1	1	1	0	1	0	0	0	0	0	0	0	0	0	0	0	0	0	0	0	0			0.454545
TcyATT_079	1	0	0	1	1	1	1	1	1	1	1	0	1	0	0	1	0	0	1	0	0	0	1	0	0	1	0	0	0	0	0	0	0	0	1	0	0	0	0	1	1	1	1	1			0.454545
TcyATT_040	1	1	0	1	1	1	1	1	1	1	0	0	1	0	0	1	0	0	0	0	1	0	1	1	0	1	0	1	0	1	1	1	0	0	0	0	0	0	0	1	1	0	0	0			0.477273
TcyATT_056	0	1	1	1	0	1	1	0	1	1	1	1	0	0	0	0	0	0	1	1	1	0	1	0	0	0	1	0	0	0	0	1	1	0	1	0	1	0	0	1	1	1	0	0			0.477273
TcyATC_055	1	1	1	1	1	1	1	1	0	1	0	1	1	0	0	0	1	0	0	1	0	0	0	0	1	0	1	0	1	0	0	0	1	0	0	1	0	0	0	1	0	1	1	1			0.5
TcyATC_155	0	0	0	0	0	0	1	0	1	0	1	0	0	1	1	1	0	1	0	1	1	1	1	1	1	1	1	1	1	0	0	0	0	0	1	0	0	0	0	1	1	0	1	1			0.5
TcyATT_011	1	1	1	1	0	1	1	0	0	1	1	1	1	0	1	1	0	1	0	1	0	1	1	1	1	0	1	1	1	0	0	0	0	0	0	0	0	0	0	0	0	0	1	0			0.5
TcyATT_135	1	0	0	1	1	0	0	1	0	0	1	0	1	1	1	1	0	1	1	0	1	1	0	1	0	1	1	0	0	1	1	0	1	1	1	0	0	0	0	1	0	0	0	0			0.5
TcyATC_110	1	0	0	1	1	1	1	1	0	1	0	1	1	0	0	0	1	0	1	0	1	0	0	0	1	0	1	1	1	1	0	1	0	0	0	0	1	1	1	0	1	0	0	1			0.522727
TcyATT_028	1	1	0	0	0	0	0	1	0	0	0	1	0	1	1	0	1	1	1	1	0	1	1	1	0	1	0	1	1	1	0	1	0	0	1	1	0	0	0	0	1	0	1	1			0.522727
TcyATT_047	1	1	1	1	1	0	0	1	1	0	0	0	1	1	1	0	0	1	1	0	0	1	1	1	1	1	1	1	0	0	0	0	0	1	1	1	0	0	1	0	0	0	0	0			0.522727
TcyATC_040	1	1	0	0	0	0	1	0	1	0	1	1	0	1	1	0	0	1	0	0	1	0	0	1	0	0	1	1	0	0	1	1	1	1	1	1	1	1	1	0	0	1	1	0			0.545455
TcyATC_100	0	0	1	0	0	0	1	0	0	0	0	0	0	1	1	0	0	0	1	1	1	0	1	0	1	1	1	0	1	1	1	1	1	0	0	1	1	1	1	1	0	1	1	1			0.545455
TcyATC_149	0	1	1	1	1	1	1	1	0	1	1	0	1	1	1	1	0	1	1	1	1	1	1	1	1	1	1	0	1	0	0	0	0	0	0	0	0	0	0	0	0	0	0	0			0.545455
TcyATT_118	1	1	0	0	0	1	0	0	1	0	1	0	0	1	1	1	1	1	1	0	0	1	0	1	0	1	1	0	1	0	1	0	1	1	0	0	0	0	1	1	0	1	1	1			0.545455
TcyATC_118	1	1	1	1	1	1	1	1	1	1	1	0	1	1	1	1	1	1	0	1	1	0	1	1	1	1	0	0	0	0	0	0	0	0	0	0	0	0	0	1	0	1	0	0			0.568182
TcyATT_045	1	1	1	1	1	1	1	1	1	1	0	1	1	0	0	0	1	0	1	1	0	0	0	0	1	0	0	1	1	1	0	1	0	1	0	1	1	0	0	0	1	0	0	1			0.568182
TcyATT_057	1	1	0	1	0	0	0	0	0	1	0	0	1	1	1	1	0	1	1	0	0	1	1	1	0	1	1	0	1	1	0	1	1	0	1	1	0	0	0	1	1	1	0	1			0.568182
TcyATC_027	1	0	0	1	1	0	0	1	0	0	0	1	1	1	1	0	1	1	1	0	0	1	1	1	1	1	1	0	0	1	1	1	1	1	0	0	1	1	1	0	0	0	0	1			0.590909
TcyATC_035	1	1	0	0	1	0	1	1	1	0	1	0	1	1	1	0	0	1	1	1	0	0	1	0	1	0	0	0	1	1	1	0	1	1	0	0	0	0	1	1	1	1	1	1			0.590909
TcyATC_074	1	1	1	1	1	0	0	1	1	0	1	0	1	1	1	1	1	1	1	1	1	1	1	1	1	1	1	0	1	0	0	0	1	1	0	0	0	0	1	0	0	0	0	1			0.636364
TcyATC_088	1	0	0	0	0	0	0	0	1	0	1	0	1	1	1	1	0	1	1	0	1	1	1	1	0	1	0	1	1	0	0	1	1	1	1	1	1	1	1	1	1	1	1	0			0.636364
TcyATC_095	1	1	1	0	1	0	0	1	1	1	1	1	1	1	1	1	1	1	1	0	1	1	1	0	1	0	1	1	0	1	1	0	0	1	1	0	0	0	1	0	0	0	0	1			0.636364
TcyATC_166	0	0	1	0	1	0	1	0	0	1	1	1	0	1	1	1	0	1	0	1	1	1	1	1	0	1	1	0	1	1	1	1	1	1	1	1	1	1	1	0	0	0	0	0			0.636364
TcyATT_029	1	1	1	1	1	1	1	1	1	0	1	0	1	1	1	1	0	1	0	1	1	1	1	0	1	0	1	1	0	1	0	0	1	1	0	0	0	1	0	1	0	0	1	0			0.636364
TcyATT_036	0	1	1	0	0	1	0	0	1	0	1	1	1	1	0	1	0	0	0	0	1	1	0	0	1	1	0	0	1	1	1	1	1	1	0	1	1	1	1	1	1	1	1	1			0.636364
TcyATT_051	1	1	1	1	1	1	1	1	1	1	1	1	0	1	1	1	0	1	1	0	1	1	0	1	0	1	1	1	0	1	0	1	0	0	0	1	0	1	0	1	0	0	0	0			0.636364
TcyATT_064	1	1	1	1	1	1	1	1	1	1	1	1	1	1	1	1	0	1	1	1	0	1	1	1	1	1	0	0	1	1	0	0	0	0	0	0	0	0	0	0	1	0	0	1			0.636364
TcyATT_086	1	1	1	0	1	1	1	1	1	1	0	1	1	0	1	1	0	0	1	1	1	0	0	1	1	1	0	0	1	0	0	1	0	0	1	0	1	1	0	0	1	1	1	1			0.636364
TcyATT_114	1	1	1	1	1	1	1	1	1	1	1	1	1	1	1	1	0	1	1	1	1	1	1	0	1	1	1	0	1	0	0	0	0	0	0	0	0	0	0	1	0	0	0	1			0.636364
TcyATC_086	1	0	1	1	1	1	1	0	1	1	0	1	0	1	1	1	0	1	1	1	1	1	1	1	1	1	1	0	1	1	1	0	1	1	0	0	0	0	1	0	0	0	0	1			0.659091
TcyATT_039	1	0	1	1	1	1	1	1	1	1	1	1	1	1	0	1	0	1	1	1	0	1	0	0	1	0	1	0	1	1	1	0	1	0	1	0	0	0	0	1	1	1	1	0			0.659091
TcyATT_097	1	1	1	1	0	1	1	1	0	1	0	1	0	1	1	0	0	1	1	1	1	1	1	1	1	0	1	0	0	0	1	1	1	0	0	1	1	1	0	1	1	0	0	1			0.659091
TcyATT_153	0	0	0	0	0	0	0	0	0	0	1	0	1	1	1	1	0	1	1	0	0	1	1	1	0	1	1	1	1	1	1	1	1	1	1	1	1	1	1	1	1	1	1	1			0.659091
TcyATC_033	1	1	1	1	1	1	1	1	1	1	1	1	1	1	1	0	0	1	1	1	1	1	1	1	1	1	1	1	0	0	0	1	0	0	1	0	0	1	0	0	0	0	0	1			0.681818
TcyATT_026	1	0	1	0	0	0	1	1	1	0	1	0	1	0	0	0	1	1	1	1	0	1	1	1	0	1	1	1	1	1	1	1	0	1	1	1	1	1	1	1	0	1	1	0			0.681818
TcyATC_013	1	1	1	1	1	1	1	1	1	1	1	1	1	0	0	1	1	1	0	1	0	0	1	0	1	1	1	1	0	1	0	1	0	0	0	1	1	0	1	1	1	1	1	0			0.704545
TcyATC_060	1	1	1	1	1	1	1	1	1	1	1	1	1	1	1	1	0	1	1	1	1	1	0	1	1	1	1	0	0	0	0	1	0	1	0	1	1	1	1	0	0	0	0	0			0.704545
TcyATC_096	1	0	1	1	1	0	0	1	1	1	1	1	1	1	1	1	1	1	1	0	0	1	1	0	1	0	1	1	0	1	1	1	1	1	1	1	0	0	1	0	0	1	0	1			0.704545
TcyATC_154	1	1	1	1	1	1	1	1	1	1	1	1	1	1	1	1	1	1	1	1	1	1	0	1	1	1	1	0	0	0	1	0	1	1	0	0	0	0	1	0	0	0	0	1			0.704545
TcyATC_113	1	1	1	1	1	1	1	1	1	1	1	1	1	1	1	1	0	1	1	1	1	1	1	1	1	1	1	1	1	1	1	0	0	1	0	0	0	0	0	0	0	0	0	1			0.727273
TcyATC_156	1	1	1	1	1	1	1	1	1	1	1	1	1	1	1	1	0	1	1	1	1	1	1	1	1	1	1	1	0	0	1	1	0	1	0	1	0	1	0	0	0	0	0	0			0.727273
TcyATT_154	1	1	1	1	1	1	1	1	1	1	1	1	1	1	1	1	1	1	1	1	1	1	1	1	1	1	1	1	1	1	0	0	0	1	0	0	0	0	0	1	0	0	0	0			0.727273
TcyATC_084	1	1	1	1	1	1	1	1	0	1	0	1	1	1	1	1	1	0	1	1	1	0	0	0	1	1	1	1	1	0	1	1	1	1	0	1	0	0	1	1	1	1	1	0			0.75
TcyATC_109	1	1	1	1	1	0	1	1	1	1	1	1	1	1	1	1	1	1	1	1	1	1	1	1	1	1	1	0	1	0	0	0	0	0	1	1	1	0	0	1	1	1	0	0			0.75
TcyATT_020	1	1	1	1	1	1	1	1	1	0	1	0	1	1	1	1	1	1	1	0	1	1	1	1	0	1	1	1	1	0	1	0	1	1	0	1	0	1	1	1	1	0	0	0			0.75
TcyATT_054	1	1	1	1	1	1	1	1	1	1	1	1	1	1	1	1	1	1	1	1	1	1	1	1	1	1	1	1	1	1	1	0	1	0	0	0	0	0	1	0	0	0	0	0			0.75
TcyATT_142	1	1	1	1	1	1	1	1	1	1	1	1	1	1	1	1	1	1	1	1	1	0	1	1	0	1	1	0	1	0	0	1	1	0	0	1	1	1	1	0	0	1	0	0			0.75
TcyATT_161	1	1	1	1	1	1	1	1	1	1	1	0	1	1	1	1	1	1	1	1	0	1	1	1	1	1	1	0	1	1	1	1	1	0	1	1	0	0	0	0	0	0	0	1			0.75
TcyATC_006	1	1	1	1	1	1	1	1	1	1	1	1	1	1	1	1	0	1	1	1	1	1	0	0	1	1	1	1	1	1	0	1	1	1	0	1	1	1	0	0	0	0	0	1			0.772727
TcyATC_104	1	1	1	1	1	1	1	1	1	1	1	1	1	1	1	1	1	1	1	1	1	1	1	1	1	1	0	1	0	1	1	0	1	1	0	0	1	1	1	0	0	0	0	0			0.772727
TcyATT_019	1	1	1	1	1	1	1	1	1	1	1	0	1	0	0	1	1	1	1	1	1	0	0	1	1	1	1	0	1	0	1	1	0	0	1	1	1	1	1	1	0	1	1	1			0.772727
TcyATT_137	1	1	1	1	0	0	0	1	0	0	1	0	1	1	1	1	0	1	1	1	1	1	1	1	0	1	1	1	1	0	1	1	1	1	1	1	1	1	1	1	1	1	0	1			0.772727
TcyATC_018	1	1	1	1	1	1	1	1	1	1	1	1	1	1	1	0	1	1	1	0	1	1	1	1	1	1	1	1	1	1	0	1	1	1	0	1	1	0	1	0	1	0	0	1			0.818182
TcyATC_165	1	1	1	1	1	0	1	1	1	1	1	1	1	1	1	1	0	1	1	1	1	1	1	1	1	1	1	0	1	1	1	1	1	1	1	1	1	1	1	0	0	0	0	0			0.818182
TcyATT_037	1	1	1	1	1	1	1	1	1	1	1	1	1	0	1	1	1	1	1	1	1	1	1	1	0	1	1	1	1	0	0	1	1	1	1	1	1	1	0	0	1	0	1	0			0.818182
TcyATT_071	1	1	1	1	1	1	1	1	1	1	1	1	1	1	1	1	0	1	1	1	1	1	1	1	1	1	1	0	0	1	0	1	1	1	0	1	1	1	0	0	1	0	1	1			0.818182
TcyATT_133	1	1	1	1	1	1	1	1	1	1	1	1	1	1	1	1	0	1	1	1	1	1	1	1	1	1	1	0	1	0	1	1	1	1	1	0	0	0	1	0	0	1	1	1			0.818182
TcyATT_030	1	1	1	0	1	1	1	1	0	1	1	1	0	1	1	1	1	1	1	1	0	1	0	1	0	1	1	1	1	1	1	1	1	1	1	1	1	0	1	1	1	1	1	1			0.840909
TcyATT_083	1	1	1	1	1	1	1	1	1	0	1	1	0	1	1	1	0	1	1	1	1	1	1	1	0	1	1	0	1	1	1	1	1	1	1	1	1	1	1	0	0	1	1	1			0.840909
TcyATC_114	1	1	1	1	1	1	1	1	1	1	1	0	1	1	1	1	1	1	1	1	1	1	1	1	1	1	1	0	1	0	1	1	1	1	1	1	1	1	0	1	1	1	0	0			0.863636
TcyATT_084	1	1	1	1	1	1	1	1	1	1	1	1	1	1	1	1	0	1	1	1	1	1	1	1	1	1	1	0	1	1	1	1	1	1	1	1	1	1	1	0	0	0	0	1			0.863636
TcyATC_135	1	1	1	1	1	1	1	1	1	1	1	1	1	1	1	1	1	1	1	1	1	1	1	1	1	1	1	0	1	1	1	1	1	1	1	1	1	1	1	0	0	0	0	1			0.886364
TcyATT_017	1	1	1	1	1	1	1	1	1	1	1	1	0	1	1	1	1	1	1	1	1	1	1	1	1	1	1	1	1	1	0	1	0	0	1	1	1	1	0	1	1	1	1	1			0.886364
TcyATC_010	1	1	1	1	1	1	1	1	1	1	1	1	1	1	1	1	1	1	1	1	1	1	1	0	1	1	1	1	1	1	1	0	1	1	1	1	0	0	1	1	1	1	1	1			0.909091
TcyATT_095	1	1	1	1	1	1	1	1	1	1	1	0	1	1	1	1	1	1	1	1	1	1	1	1	1	1	1	1	1	1	1	1	1	1	1	1	1	1	1	1	1	0	0	1			0.931818
TcyATC_014	1	1	1	1	1	1	1	1	1	1	1	1	1	1	1	1	1	1	1	1	1	1	0	1	1	1	1	1	1	1	1	0	1	1	1	1	1	1	1	1	1	1	1	1			0.954545
TcyATC_079	1	1	1	1	1	1	1	1	1	1	1	1	1	1	1	1	1	1	1	1	1	1	1	1	1	1	1	1	1	1	0	1	1	1	0	1	1	1	1	1	1	1	1	1			0.954545
TcyATT_162	1	1	1	1	1	1	1	1	1	1	1	1	1	1	1	1	0	1	1	1	1	1	1	1	1	1	1	0	1	1	1	1	1	1	1	1	1	1	1	1	1	1	1	1			0.954545
TcyATT_111	1	1	1	1	1	1	1	1	1	1	1	1	1	1	1	1	0	1	1	1	1	1	1	1	1	1	1	1	1	1	1	1	1	1	1	1	1	1	1	1	1	1	1	1			0.977273
TcyATC_081	1	1	1	1	1	1	1	1	1	1	1	1	1	1	1	1	1	1	1	1	1	1	1	1	1	1	1	1	1	1	1	1	1	1	1	1	1	1	1	1	1	1	1	1			1
TcyATC_111	1	1	1	1	1	1	1	1	1	1	1	1	1	1	1	1	1	1	1	1	1	1	1	1	1	1	1	1	1	1	1	1	1	1	1	1	1	1	1	1	1	1	1	1			1
TcyATT_094	1	1	1	1	1	1	1	1	1	1	1	1	1	1	1	1	1	1	1	1	1	1	1	1	1	1	1	1	1	1	1	1	1	1	1	1	1	1	1	1	1	1	1	1			1
TcyATT_146	1	1	1	1	1	1	1	1	1	1	1	1	1	1	1	1	1	1	1	1	1	1	1	1	1	1	1	1	1	1	1	1	1	1	1	1	1	1	1	1	1	1	1	1			1
TcyATT_148	1	1	1	1	1	1	1	1	1	1	1	1	1	1	1	1	1	1	1	1	1	1	1	1	1	1	1	1	1	1	1	1	1	1	1	1	1	1	1	1	1	1	1	1			1
TcyATT_159	1	1	1	1	1	1	1	1	1	1	1	1	1	1	1	1	1	1	1	1	1	1	1	1	1	1	1	1	1	1	1	1	1	1	1	1	1	1	1	1	1	1	1	1			1
TcyATT_160	1	1	1	1	1	1	1	1	1	1	1	1	1	1	1	1	1	1	1	1	1	1	1	1	1	1	1	1	1	1	1	1	1	1	1	1	1	1	1	1	1	1	1	1			1
[truncated: 10 more columns]

## Sheet: Table S3 Data for Figure 2
												PDR1										4Neν (PDR1)
	occupied site allele frequency							PDR1	Cyclops			Observed	expected				3.841				from Φ(x)	1.677		Φ(x)	best fit		Φ(x)			4Neν (PDR1)	Sum of chi sq				4Neν
										p value			Φ(x) exp (eq8.17)		Kimura		chi square				from SSAP freq	#REF!		from Φ(x)			eq 8.22
													(Neρ with min. chi square)
PDR1p_0007	0.0227273	PDR1						281	328		0												0.002	837.364	836.867		837.369			0.5	98.9501				Kimura	He
PDR1p_0037	0.0227273							256	307		0.04	25										#REF!	0.04	40.7822	40.7595		40.8737			#REF!	87.1506			PDR1	1.677	#REF!		#REF!
PDR1p_0045	0.0227273							197	244		0.08	59	57.0879				0.0640413						0.08	19.812	19.8018		19.9901			0.6	81.7109			Cyclops	1.141	0.698081		1.63448
PDR1p_0048	0.0227273							159	204		0.12	38	36.932				0.0308846						0.12	12.8164	12.8104		13.0772			0.7	67.7169			Both	0	0		#DIV/0!
PDR1p_0058	0.0227273							135	170		0.16	24	26.8415				0.300805						0.16	9.3143	9.31037		9.65473			0.8	56.3929
PDR1p_0067	0.0227273							122	156		0.2	13	20.7765				2.9107						0.2	7.20933	7.20664		7.6271			0.9	46.4739
PDR1p_0068	0.0227273							102	135		0.24	20	16.7237				0.64185						0.24	5.80273	5.80087		6.29632			1	34.254
PDR1p_0072	0.0227273							80	115	0.0277829	0.28	22	13.8201	22			4.84149						0.28	4.79501	4.79372		5.36362			1.1	27.8226
PDR1p_0103	0.0227273							73	103		0.32	7	11.6343				1.84598						0.32	4.03638	4.03553		4.67999			1.2	23.0444
PDR1p_0106	0.0227273							64	99		0.36	9	9.92633				0.0864464						0.36	3.44361	3.4431		4.16298			1.3	17.8132
PDR1p_0109	0.0227273							55	89		0.4	9	8.55232				0.0234341						0.4	2.96675	2.9665		3.76349			1.4	15.3558
PDR1p_0112	0.0227273							45	78		0.44	10	7.42055				0.896639						0.44	2.57397	2.57393		3.4507			1.5	13.8312
PDR1p_0117	0.0227273							38	72		0.48	7	6.4698				0.0434501						0.48	2.24402	2.24415		3.20454			1.6	13.0992
PDR1p_0120	0.0227273							34	68		0.52	4	5.65756				0.485636						0.52	1.96214	1.96241		3.01172			1.65	13.0378
PDR1p_0122	0.0227273							31	61		0.56	3	4.95336										0.56	1.71776	1.71815		2.86354			1.67	12.1736
PDR1p_0135	0.0227273							27	56		0.6	4	4.33466										0.6	1.50306	1.50354		2.75465			1.674	12.1724
PDR1p_0158	0.0227273							21	46		0.64	6	3.78438										0.64	1.31211	1.31267		2.68257			1.675	12.1723
PDR1p_0191	0.0227273							20	42		0.68	1	3.28917										0.68	1.14028	1.1409		2.64763		12.1722	1.676	12.1722
PDR1p_0194	0.0227273							15	36		0.72	5	2.83831										0.72	0.983845	0.98451		2.65361			1.676	12.1722
PDR1p_0199	0.0227273							10	27		0.76	5	2.42283										0.76	0.839697	0.840395		2.7095			1.678	12.1723
PDR1p_0255	0.0227273							10	23		0.8	0	2.03479										0.8	0.705083	0.705798		2.83352			1.679	12.1725
PDR1p_0256	0.0227273							9	18		0.84	0	1.66655										0.84	0.577355	0.578069		3.06333			1.68	12.1727
PDR1p_0270	0.0227273							7	14		0.88	2	1.30966										0.88	0.453582	0.454274		3.48591			1.681	12.173
PDR1p_0274	0.0227273							7	11		0.92	0	0.95239										0.92	0.329714	0.330351		4.35196			1.685	12.1748
PDR1p_0031	0.0227273							5	7		0.96	2	0.571262										0.96	0.197632	0.198151		6.82581			1.69	12.1786
PDR1p_0010	0.0454545							0	0		1	5											0.998	0.025015	0.0251559		73.5587			1.7	12.1914
PDR1p_0042	0.0454545																													1.75	12.3571
PDR1p_0055	0.0454545											250	250				12.1713							86.7367	86.7162		121.155			1.8	12.6888
PDR1p_0089	0.0454545																12.1722													1.9	13.8359
PDR1p_0097	0.0454545									0.976342		28	28.1574				0.000879437													2	14.4808
PDR1p_0100	0.0454545
PDR1p_0104	0.0454545
PDR1p_0105	0.0454545
PDR1p_0114	0.0454545
PDR1p_0118	0.0454545
PDR1p_0127	0.0454545
PDR1p_0133	0.0454545
PDR1p_0136	0.0454545
PDR1p_0155	0.0454545
PDR1p_0157	0.0454545																					4Neν (Cyclops)		Φ(x)			Φ(x)
PDR1p_0176	0.0454545											Cyclops	Φ(x) exp (eq8.17)				Chi square				from Φ(x)	1.141		eq 8.17	best fit		eq 8.22			4Neν (Cyclops)
PDR1p_0183	0.0454545											obs	min chi square				vs eq8.17				from SSAP freq	0.698081
PDR1p_0187	0.0454545										0												0.002	570.339	570.339		570.34
PDR1p_0188	0.0454545										0.04	21											0.04	28.3613	28.3613		28.3911			0.5	69.3174
PDR1p_0189	0.0454545										0.08	63	57.3704				0.552413						0.08	14.0958	14.0958		14.1559			0.6	53.8602
PDR1p_0196	0.0454545										0.12	40	38.008				0.104403						0.12	9.33849	9.33849		9.42955			0.698081	42.1968
PDR1p_0200	0.0454545										0.16	34	28.3196				1.13938						0.16	6.95807	6.95807		7.08092			0.7	41.9996
PDR1p_0203	0.0454545										0.2	14	22.5004				3.21134						0.2	5.5283	5.5283		5.68405			0.8	33.2157
PDR1p_0250	0.0454545										0.24	21	18.6152				0.305521						0.24	4.57372	4.57372		4.76379			0.9	27.1379
PDR1p_0253	0.0454545										0.28	20	15.8347				1.09568						0.28	3.89055	3.89055		4.11669			1	23.3667
PDR1p_0260	0.0454545										0.32	12	13.7441				0.221334						0.32	3.37691	3.37691		3.64126			1.1	21.7355
PDR1p_0266	0.0454545									0.0197493	0.36	4	12.113	4			5.43392						0.36	2.97615	2.97615		3.28135			1.12	21.7356
PDR1p_0267	0.0454545										0.4	10	10.803				0.059684						0.4	2.65427	2.65427		3.00354			1.13	21.7506
PDR1p_0271	0.0454545										0.44	11	9.72581				0.166933						0.44	2.38961	2.38961		2.78693			1.14	21.7863
PDR1p_0277	0.0454545										0.48	6	8.82265				0.903058						0.48	2.16771	2.16771		2.61797		19.4275	1.141	19.4275
PDR1p_0003	0.0681818										0.52	4	8.05259				2.03953						0.52	1.97851	1.97851		2.48785			1.142	19.4353
PDR1p_0014	0.0681818										0.56	7	7.38623				0.020196						0.56	1.81478	1.81478		2.39097			1.143	19.4433
PDR1p_0018	0.0681818										0.6	5	6.80179				0.477293						0.6	1.67119	1.67119		2.32422			1.144	19.4516
PDR1p_0051	0.0681818										0.64	10	6.28265				2.19951						0.64	1.54363	1.54363		2.28667			1.145	19.46
PDR1p_0060	0.0681818										0.68	4	5.81569				0.566868						0.68	1.4289	1.4289		2.27972			1.15	19.5053
PDR1p_0064	0.0681818										0.72	6	5.39015				0.0689998						0.72	1.32435	1.32435		2.30778			1.155	19.5558
PDR1p_0065	0.0681818										0.76	9	4.99666										0.76	1.22767	1.22767		2.38001			1.16	19.6115
PDR1p_0091	0.0681818										0.8	4	4.62636										0.8	1.13669	1.13669		2.51422			1.17	19.7384
PDR1p_0099	0.0681818										0.84	5	4.26958										0.84	1.04903	1.04903		2.74657			1.18	19.886
PDR1p_0110	0.0681818										0.88	4	3.9135										0.88	0.96154	0.96154		3.16005			1.19	20.0543
PDR1p_0115	0.0681818										0.92	3	3.53534										0.92	0.868627	0.868627		3.99363			1.2	20.2431
PDR1p_0121	0.0681818										0.96	4	3.07258										0.96	0.754927	0.754927		6.35892			1.25	21.352
PDR1p_0126	0.0681818										1	7											0.998	0.475993	0.475993		70.6529			1.3	23.0236
PDR1p_0129	0.0681818																18.5661													1.4	24.8798
PDR1p_0137	0.0681818											300	300				19.4275							73.7094	73.7094		95.7926			1.5	25.469
PDR1p_0151	0.0681818																													1.6	37.998
PDR1p_0167	0.0681818									0.353338		29	24.414				0.861434													1.7	47.3614
PDR1p_0202	0.0681818																													1.8	50.2658
PDR1p_0215	0.0681818																													1.9	61.2001
PDR1p_0221	0.0681818																													2	73.7287
PDR1p_0222	0.0681818
PDR1p_0226	0.0681818
PDR1p_0233	0.0681818
PDR1p_0238	0.0681818
PDR1p_0243	0.0681818
PDR1p_0244	0.0681818
PDR1p_0254	0.0681818
PDR1p_0269	0.0681818
PDR1p_0273	0.0681818
PDR1p_0021	0.0909091
PDR1p_0052	0.0909091
PDR1p_0061	0.0909091
PDR1p_0062	0.0909091
PDR1p_0069	0.0909091
PDR1p_0070	0.0909091
PDR1p_0075	0.0909091
PDR1p_0076	0.0909091
PDR1p_0078	0.0909091
PDR1p_0124	0.0909091
PDR1p_0149	0.0909091
PDR1p_0166	0.0909091
PDR1p_0169	0.0909091
PDR1p_0190	0.0909091
PDR1p_0193	0.0909091
PDR1p_0219	0.0909091
PDR1p_0237	0.0909091
PDR1p_0239	0.0909091
PDR1p_0247	0.0909091
PDR1p_0251	0.0909091
PDR1p_0272	0.0909091
PDR1p_0279	0.0909091
PDR1p_0280	0.0909091
PDR1p_0012	0.113636
PDR1p_0071	0.113636
PDR1p_0093	0.113636
PDR1p_0095	0.113636
PDR1p_0107	0.113636
PDR1p_0123	0.113636
PDR1p_0139	0.113636
PDR1p_0186	0.113636
PDR1p_0198	0.113636
PDR1p_0204	0.113636
PDR1p_0209	0.113636
PDR1p_0225	0.113636
PDR1p_0245	0.113636
PDR1p_0258	0.113636
PDR1p_0264	0.113636
PDR1p_0043	0.136364
PDR1p_0053	0.136364
PDR1p_0082	0.136364
PDR1p_0128	0.136364
PDR1p_0161	0.136364
PDR1p_0177	0.136364
PDR1p_0180	0.136364
PDR1p_0206	0.136364
PDR1p_0229	0.136364
PDR1p_0232	0.136364
PDR1p_0019	0.159091
PDR1p_0044	0.159091
PDR1p_0049	0.159091
PDR1p_0119	0.159091
PDR1p_0130	0.159091
PDR1p_0131	0.159091
PDR1p_0141	0.159091
PDR1p_0142	0.159091
PDR1p_0153	0.159091
PDR1p_0160	0.159091
PDR1p_0178	0.159091
PDR1p_0195	0.159091
PDR1p_0197	0.159091
PDR1p_0249	0.159091
PDR1p_0013	0.181818
PDR1p_0041	0.181818
PDR1p_0086	0.181818
PDR1p_0138	0.181818
PDR1p_0146	0.181818
PDR1p_0168	0.181818
PDR1p_0173	0.181818
PDR1p_0201	0.181818
PDR1p_0212	0.181818
PDR1p_0213	0.181818
PDR1p_0223	0.181818
PDR1p_0248	0.181818
PDR1p_0275	0.181818
PDR1p_0022	0.204545
PDR1p_0026	0.204545
PDR1p_0030	0.204545
PDR1p_0038	0.204545
PDR1p_0039	0.204545
PDR1p_0057	0.204545
PDR1p_0066	0.204545
PDR1p_0085	0.204545
PDR1p_0111	0.204545
PDR1p_0179	0.204545
PDR1p_0205	0.204545
PDR1p_0262	0.204545
PDR1p_0002	0.227273
PDR1p_0159	0.227273
PDR1p_0164	0.227273
PDR1p_0165	0.227273
PDR1p_0181	0.227273
PDR1p_0185	0.227273
PDR1p_0218	0.227273
PDR1p_0236	0.227273
PDR1p_0004	0.25
PDR1p_0015	0.25
PDR1p_0024	0.25
PDR1p_0027	0.25
PDR1p_0040	0.25
PDR1p_0081	0.25
PDR1p_0084	0.25
PDR1p_0132	0.25
PDR1p_0152	0.25
PDR1p_0216	0.25
PDR1p_0220	0.25
PDR1p_0230	0.25
PDR1p_0252	0.25
PDR1p_0257	0.25
PDR1p_0009	0.272727
PDR1p_0017	0.272727
PDR1p_0023	0.272727
PDR1p_0046	0.272727
PDR1p_0056	0.272727
PDR1p_0101	0.272727
PDR1p_0125	0.272727
PDR1p_0241	0.272727
PDR1p_0090	0.295455
PDR1p_0096	0.295455
PDR1p_0278	0.295455
PDR1p_0020	0.318182
PDR1p_0034	0.318182
PDR1p_0047	0.318182
PDR1p_0108	0.318182
PDR1p_0025	0.340909
PDR1p_0032	0.340909
PDR1p_0054	0.340909
PDR1p_0083	0.340909
PDR1p_0088	0.340909
PDR1p_0175	0.340909
PDR1p_0184	0.340909
PDR1p_0211	0.340909
PDR1p_0231	0.340909
PDR1p_0029	0.363636
PDR1p_0074	0.363636
PDR1p_0116	0.363636
PDR1p_0182	0.363636
PDR1p_0224	0.363636
PDR1p_0234	0.363636
PDR1p_0028	0.386364
PDR1p_0073	0.386364
PDR1p_0092	0.386364
PDR1p_0005	0.409091
PDR1p_0102	0.409091
PDR1p_0144	0.409091
PDR1p_0170	0.409091
PDR1p_0208	0.409091
PDR1p_0059	0.431818
PDR1p_0077	0.431818
PDR1p_0113	0.431818
PDR1p_0217	0.431818
PDR1p_0235	0.431818
PDR1p_0008	0.454545
PDR1p_0094	0.454545
PDR1p_0154	0.454545
PDR1p_0156	0.454545
PDR1p_0263	0.454545
PDR1p_0143	0.477273
PDR1p_0227	0.477273
PDR1p_0087	0.5
PDR1p_0228	0.5
PDR1p_0246	0.5
PDR1p_0259	0.5
PDR1p_0006	0.522727
PDR1p_0063	0.522727
PDR1p_0192	0.545455
PDR1p_0035	0.568182
PDR1p_0050	0.590909
PDR1p_0080	0.590909
PDR1p_0214	0.590909
PDR1p_0016	0.613636
PDR1p_0140	0.613636
PDR1p_0210	0.613636
PDR1p_0261	0.613636
PDR1p_0036	0.636364
PDR1p_0240	0.636364
PDR1p_0098	0.659091
PDR1p_0134	0.681818
PDR1p_0150	0.681818
PDR1p_0001	0.704545
PDR1p_0079	0.704545
PDR1p_0242	0.704545
PDR1p_0148	0.727273
PDR1p_0276	0.727273
PDR1p_0207	0.75
PDR1p_0268	0.75
PDR1p_0281	0.75
PDR1p_0033	0.818182
PDR1p_0145	0.863636
PDR1p_0147	0.863636
PDR1p_0011	0.931818
PDR1p_0174	0.954545
PDR1p_0162	1
PDR1p_0163	1
PDR1p_0171	1
PDR1p_0172	1
PDR1p_0265	1
0	0
TcyATC_004	0.0227273
TcyATC_005	0.0227273
TcyATC_016	0.0227273	Cyclops
TcyATC_058	0.0227273
TcyATC_116	0.0227273
TcyATC_133	0.0227273
TcyATC_134	0.0227273
TcyATC_147	0.0227273
TcyATC_148	0.0227273
TcyATC_151	0.0227273
TcyATC_159	0.0227273
TcyATC_162	0.0227273
TcyATT_008	0.0227273
TcyATT_025	0.0227273
TcyATT_062	0.0227273
TcyATT_074	0.0227273
TcyATT_090	0.0227273
TcyATT_116	0.0227273
TcyATT_127	0.0227273
TcyATT_143	0.0227273
TcyATT_150	0.0227273
TcyATC_007	0.0454545
TcyATC_047	0.0454545
TcyATC_052	0.0454545
TcyATC_062	0.0454545
TcyATC_064	0.0454545
TcyATC_065	0.0454545
TcyATC_071	0.0454545
TcyATC_073	0.0454545
TcyATC_078	0.0454545
TcyATC_082	0.0454545
TcyATC_108	0.0454545
TcyATC_120	0.0454545
TcyATC_137	0.0454545
TcyATC_141	0.0454545
TcyATC_143	0.0454545
TcyATC_145	0.0454545
TcyATC_146	0.0454545
TcyATC_152	0.0454545
TcyATT_004	0.0454545
TcyATT_013	0.0454545
TcyATT_073	0.0454545
TcyATT_085	0.0454545
TcyATT_087	0.0454545
TcyATT_092	0.0454545
TcyATT_096	0.0454545
TcyATT_098	0.0454545
TcyATT_110	0.0454545
TcyATT_126	0.0454545
TcyATT_138	0.0454545
TcyATT_144	0.0454545
TcyATT_145	0.0454545
TcyATT_155	0.0454545
TcyATT_163	0.0454545
TcyATC_009	0.0681818
TcyATC_032	0.0681818
TcyATC_041	0.0681818
TcyATC_056	0.0681818
TcyATC_057	0.0681818
TcyATC_083	0.0681818
TcyATC_105	0.0681818
TcyATC_121	0.0681818
TcyATC_123	0.0681818
TcyATC_139	0.0681818
TcyATC_144	0.0681818
TcyATC_161	0.0681818
TcyATC_164	0.0681818
TcyATT_003	0.0681818
TcyATT_023	0.0681818
TcyATT_058	0.0681818
TcyATT_066	0.0681818
TcyATT_067	0.0681818
TcyATT_072	0.0681818
TcyATT_080	0.0681818
TcyATT_103	0.0681818
TcyATT_104	0.0681818
TcyATT_108	0.0681818
TcyATT_109	0.0681818
TcyATT_120	0.0681818
TcyATT_121	0.0681818
TcyATT_125	0.0681818
TcyATT_128	0.0681818
TcyATT_152	0.0681818
TcyATT_158	0.0681818
TcyATC_022	0.0909091
TcyATC_031	0.0909091
TcyATC_038	0.0909091
TcyATC_049	0.0909091
TcyATC_087	0.0909091
TcyATC_112	0.0909091
TcyATC_115	0.0909091
TcyATC_127	0.0909091
TcyATC_163	0.0909091
TcyATC_167	0.0909091
TcyATT_001	0.0909091
TcyATT_018	0.0909091
TcyATT_022	0.0909091
TcyATT_044	0.0909091
TcyATT_055	0.0909091
TcyATT_112	0.0909091
TcyATT_122	0.0909091
TcyATT_129	0.0909091
TcyATC_011	0.113636
TcyATC_017	0.113636
TcyATC_023	0.113636
TcyATC_046	0.113636
TcyATC_075	0.113636
TcyATC_076	0.113636
TcyATC_098	0.113636
TcyATC_106	0.113636
TcyATC_125	0.113636
TcyATC_129	0.113636
TcyATC_132	0.113636
TcyATC_136	0.113636
TcyATC_158	0.113636
TcyATT_053	0.113636
TcyATT_059	0.113636
TcyATT_061	0.113636
TcyATT_091	0.113636
TcyATT_100	0.113636
TcyATT_123	0.113636
TcyATT_132	0.113636
TcyATT_151	0.113636
TcyATT_157	0.113636
TcyATC_012	0.136364
TcyATC_024	0.136364
TcyATC_066	0.136364
TcyATC_068	0.136364
TcyATC_080	0.136364
TcyATC_091	0.136364
TcyATC_097	0.136364
TcyATC_099	0.136364
TcyATC_117	0.136364
TcyATC_119	0.136364
TcyATC_138	0.136364
TcyATT_006	0.136364
TcyATT_032	0.136364
TcyATT_035	0.136364
TcyATT_063	0.136364
TcyATT_070	0.136364
TcyATT_076	0.136364
TcyATT_089	0.136364
TcyATT_107	0.136364
TcyATT_113	0.136364
TcyATC_042	0.159091
TcyATC_043	0.159091
TcyATC_061	0.159091
TcyATC_089	0.159091
TcyATC_090	0.159091
TcyATC_103	0.159091
TcyATC_128	0.159091
TcyATC_140	0.159091
TcyATC_153	0.159091
TcyATT_010	0.159091
TcyATT_081	0.159091
TcyATT_101	0.159091
TcyATT_131	0.159091
TcyATT_156	0.159091
TcyATC_025	0.181818
TcyATC_029	0.181818
TcyATC_039	0.181818
TcyATC_051	0.181818
TcyATC_092	0.181818
TcyATC_124	0.181818
TcyATC_131	0.181818
TcyATC_142	0.181818
TcyATT_007	0.181818
TcyATT_024	0.181818
TcyATT_038	0.181818
TcyATT_093	0.181818
TcyATT_105	0.181818
TcyATT_106	0.181818
TcyATC_019	0.204545
TcyATC_053	0.204545
TcyATC_059	0.204545
TcyATC_077	0.204545
TcyATC_101	0.204545
TcyATC_126	0.204545
TcyATT_046	0.204545
TcyATT_048	0.204545
TcyATT_068	0.204545
TcyATT_082	0.204545
TcyATT_102	0.204545
TcyATT_124	0.204545
TcyATT_139	0.204545
TcyATC_015	0.227273
TcyATC_072	0.227273
TcyATC_093	0.227273
TcyATC_102	0.227273
TcyATC_107	0.227273
TcyATT_009	0.227273
TcyATT_034	0.227273
TcyATT_075	0.227273
TcyATC_036	0.25
TcyATC_085	0.25
TcyATC_122	0.25
TcyATC_160	0.25
TcyATT_078	0.25
TcyATT_140	0.25
TcyATT_141	0.25
TcyATT_149	0.25
TcyATC_001	0.272727
TcyATC_008	0.272727
TcyATC_028	0.272727
TcyATC_037	0.272727
TcyATC_045	0.272727
TcyATC_054	0.272727
TcyATC_069	0.272727
TcyATC_157	0.272727
TcyATT_033	0.272727
TcyATT_069	0.272727
TcyATT_119	0.272727
TcyATT_147	0.272727
TcyATC_130	0.295455
TcyATT_021	0.295455
TcyATT_052	0.295455
TcyATT_060	0.295455
TcyATT_134	0.295455
TcyATC_003	0.318182
TcyATC_026	0.318182
TcyATC_063	0.318182
TcyATT_002	0.318182
TcyATT_041	0.318182
TcyATT_077	0.318182
TcyATT_117	0.318182
TcyATC_050	0.340909
TcyATC_150	0.340909
TcyATT_012	0.340909
TcyATT_049	0.340909
TcyATC_021	0.363636
TcyATC_048	0.363636
TcyATC_094	0.363636
TcyATT_015	0.363636
TcyATT_042	0.363636
TcyATT_050	0.363636
TcyATT_099	0.363636
TcyATT_130	0.363636
TcyATC_034	0.386364
TcyATT_043	0.386364
TcyATC_002	0.409091
TcyATC_067	0.409091
TcyATT_005	0.409091
TcyATT_031	0.409091
TcyATC_020	0.431818
TcyATT_014	0.431818
TcyATT_016	0.431818
TcyATT_027	0.431818
TcyATT_065	0.431818
TcyATT_088	0.431818
TcyATT_136	0.431818
TcyATC_030	0.454545
TcyATC_044	0.454545
TcyATC_070	0.454545
TcyATT_079	0.454545
TcyATT_040	0.477273
TcyATT_056	0.477273
TcyATC_055	0.5
TcyATC_155	0.5
TcyATT_011	0.5
TcyATT_135	0.5
TcyATC_110	0.522727
TcyATT_028	0.522727
TcyATT_047	0.522727
TcyATC_040	0.545455
TcyATC_100	0.545455
TcyATC_149	0.545455
TcyATT_118	0.545455
TcyATC_118	0.568182
TcyATT_045	0.568182
TcyATT_057	0.568182
TcyATC_027	0.590909
TcyATC_035	0.590909
TcyATC_074	0.636364
TcyATC_088	0.636364
TcyATC_095	0.636364
TcyATC_166	0.636364
TcyATT_029	0.636364
TcyATT_036	0.636364
TcyATT_051	0.636364
TcyATT_064	0.636364
TcyATT_086	0.636364
TcyATT_114	0.636364
TcyATC_086	0.659091
TcyATT_039	0.659091
TcyATT_097	0.659091
TcyATT_153	0.659091
TcyATC_033	0.681818
TcyATT_026	0.681818
TcyATC_013	0.704545
TcyATC_060	0.704545
TcyATC_096	0.704545
TcyATC_154	0.704545
TcyATC_113	0.727273
TcyATC_156	0.727273
TcyATT_154	0.727273
TcyATC_084	0.75
TcyATC_109	0.75
TcyATT_020	0.75
TcyATT_054	0.75
TcyATT_142	0.75
TcyATT_161	0.75
TcyATC_006	0.772727
TcyATC_104	0.772727
TcyATT_019	0.772727
TcyATT_137	0.772727
TcyATC_018	0.818182
TcyATC_165	0.818182
TcyATT_037	0.818182
TcyATT_071	0.818182
TcyATT_133	0.818182
TcyATT_030	0.840909
TcyATT_083	0.840909
TcyATC_114	0.863636
TcyATT_084	0.863636
TcyATC_135	0.886364
TcyATT_017	0.886364
TcyATC_010	0.909091
TcyATT_095	0.931818
TcyATC_014	0.954545
TcyATC_079	0.954545
TcyATT_162	0.954545
TcyATT_111	0.977273
TcyATC_081	1
TcyATC_111	1
TcyATT_094	1
TcyATT_146	1
TcyATT_148	1
TcyATT_159	1
TcyATT_160	1
TcyATT_115	0

## Sheet: Table S4 Data for Figure A2
																								x	Φ(x)
	0.01	0.25	0.5	0.75	1	1.5	2	4	4Neν														4Neν		0.01	0.25	0.5	0.75	1	1.5	2	4	2	2.25	2.5	2.75	3	3.25	3.5	3.75	4
x	Φ(x)
0.01	98.945	130.183	156.55	176.997	193.148	217.675	236.425	288.434																0.01	1.01	25.1892	50.2519	75.1887	100	149.248	198	388.12	198	222.191	246.259	270.206	294.03	317.733	341.316	364.778	388.12
0.02	49.9723	65.5889	78.6731	88.7235	96.574	108.287	117.018	139.891																0.02	0.510101	12.6908	25.2538	37.6899	50	74.2462	98	188.238	98	109.695	121.269	132.724	144.06	155.279	166.381	177.367	188.238
0.03	33.6548	44.0636	52.7184	59.3009	64.3827	71.8217	77.2162	90.4346																0.03	0.343538	8.52589	16.9224	25.1911	33.3333	49.2443	64.6667	121.69	64.6667	72.1981	79.6116	86.9084	94.09	101.158	108.113	114.956	121.69
0.04	25.5014	33.3056	39.7442	44.591	48.287	53.5879	57.3151	65.7498																0.04	0.26031	6.44431	12.7578	18.9423	25	36.7423	48	88.4736	48	53.4517	58.7878	64.0099	69.12	74.1197	79.0107	83.7948	88.4736
0.05	20.6137	26.8545	31.9623	35.7663	38.6296	42.6465	45.3745	50.9731																0.05	0.210418	5.1961	10.2598	15.1936	20	29.2404	38	68.59	38	42.2053	46.2973	50.2781	54.15	57.9151	61.5754	65.133	68.59
0.06	17.359	22.5571	26.7765	29.8842	32.1913	35.3512	37.414	41.1503																0.06	0.177195	4.36458	8.59518	12.6949	16.6667	24.2384	31.3333	55.3723	31.3333	34.7089	37.9735	41.1297	44.18	47.127	49.9731	52.7208	55.3723
0.07	15.0375	19.4904	23.0744	25.6836	27.5926	30.1394	31.728	34.1579																0.07	0.153498	3.7712	7.4068	10.9104	14.2857	20.665	26.5714	45.9633	26.5714	29.3554	32.0307	34.6003	37.0671	39.4341	41.704	43.8795	45.9633
0.08	13.2994	17.1929	20.2995	22.534	24.1435	26.2298	27.4635	28.9344																0.08	0.135756	3.32667	6.51608	9.57248	12.5	17.9844	23	38.9344	23	25.3412	27.576	29.7079	31.74	33.6756	35.5179	37.2699	38.9344
0.09	11.9503	15.4084	18.1429	20.085	21.4609	23.1883	24.1466	24.8898																0.09	0.121985	2.98137	5.8238	8.53215	11.1111	15.899	20.2222	33.492	20.2222	22.2199	24.1135	25.9067	27.6033	29.2068	30.7206	32.1479	33.492
0.1	10.8736	13.9829	16.4191	18.1265	19.3148	20.7545	21.4932	21.6705																0.1	0.110994	2.70557	5.27046	7.70018	10	14.2302	18	29.16	18	19.7236	21.3454	22.8695	24.3	25.6406	26.8952	28.0671	29.16
0.11	9.99503	12.8187	15.01	16.5248	17.5589	18.7626	19.3221	19.051																0.11	0.102026	2.4803	4.81817	7.01974	9.09091	12.8645	16.1818	25.6352	16.1818	17.6818	19.0824	20.3879	21.6027	22.731	23.7766	24.7435	25.6352
0.12	9.26518	11.8505	13.8372	15.1905	16.0957	17.1022	17.513	16.8814																0.12	0.094576	2.29296	4.44168	6.45297	8.33333	11.726	14.6667	22.7157	14.6667	15.981	17.1982	18.323	19.36	20.3137	21.1882	21.9876	22.7157
0.13	8.64979	11.0331	12.846	14.0622	14.8575	15.6967	15.9821	15.0576																0.13	0.0882943	2.1348	4.12351	5.97363	7.69231	10.7624	13.3846	20.2616	13.3846	14.5425	15.6054	16.5786	17.4669	18.275	19.0074	19.6683	20.2616
0.14	8.1244	10.3342	11.9975	13.0955	13.7963	14.4915	14.6699	13.5054																0.14	0.0829313	1.99958	3.85117	5.56299	7.14286	9.93602	12.2857	18.173	12.2857	13.31	14.2416	15.0861	15.8486	16.534	17.1469	17.6919	18.173
0.15	7.67109	9.73027	11.2634	12.2583	12.8765	13.4465	13.5327	12.1704																0.15	0.078304	1.88271	3.61551	5.20733	6.66667	9.21954	11.3333	16.3767	11.3333	12.2424	13.061	13.7951	14.45	15.0309	15.5426	15.9898	16.3767
0.16	7.2764	9.20345	10.6221	11.5262	12.0717	12.5317	12.5377	11.0118																0.16	0.0742751	1.78078	3.40965	4.89634	6.25	8.59233	10.5	14.8176	10.5	11.3087	12.0293	12.6678	13.23	13.7212	14.1464	14.5104	14.8176
0.17	6.93005	8.74023	10.0573	10.8807	11.3616	11.7242	11.6597	9.99829																0.17	0.0707398	1.69115	3.22836	4.62214	5.88235	8.03862	9.76471	13.4538	9.76471	10.4853	11.1201	11.6754	12.1571	12.5707	12.9215	13.2144	13.4538
0.18	6.62406	8.33004	9.55631	10.3074	10.7304	11.0059	10.8793	9.10562																0.18	0.0676164	1.61179	3.06754	4.3786	5.55556	7.54615	9.11111	12.2526	9.11111	9.75388	10.3131	10.7953	11.2067	11.5529	11.8394	12.0711	12.2526
0.19	6.35212	7.96458	9.10906	9.79491	10.1657	10.3629	10.181	8.31461																0.19	0.0648405	1.54107	2.92398	4.16089	5.26316	7.10526	8.52632	11.1882	8.52632	9.09987	9.59211	10.0099	10.3595	10.6468	10.8774	11.0563	11.1882
0.2	6.10919	7.63717	8.70752	9.33411	9.6574	9.78377	9.55252	7.60993																0.2	0.0623607	1.47772	2.79508	3.96514	5	6.7082	8	10.24	8	8.51167	8.94427	9.30487	9.6	9.83571	10.0176	10.1508	10.24
0.21	5.89119	7.34244	8.3452	8.91762	9.19752	9.25946	8.98392	6.97915																0.21	0.0601354	1.42069	2.67878	3.78822	4.7619	6.34871	7.52381	9.39122	7.52381	7.97989	8.35914	8.66884	8.91571	9.10594	9.2452	9.3387	9.39122
0.22	5.69477	7.07598	8.01677	8.53943	8.77945	8.78246	8.467	6.41212																0.22	0.0581304	1.36914	2.57336	3.62756	4.54545	6.02166	7.09091	8.62822	7.09091	7.49684	7.82815	8.09237	8.29636	8.44644	8.54834	8.60734	8.62822
0.23	5.51721	6.83415	7.71785	8.19454	8.39774	8.34659	7.99504	5.90045																0.23	0.0563179	1.32234	2.4774	3.48105	4.34783	5.7228	6.69565	7.9397	6.69565	7.05615	7.34426	7.5677	7.73348	7.84801	7.91712	7.94608	7.9397
0.24	5.35619	6.61392	7.44477	7.87881	8.04783	7.9467	7.56241	5.43713																0.24	0.0546743	1.27973	2.38975	3.34693	4.16667	5.44862	6.33333	7.31627	6.33333	6.65255	6.90159	7.08835	7.22	7.30302	7.34329	7.34611	7.31627
0.25	5.20981	6.41275	7.19447	7.58874	7.72592	7.57848	7.16439	5.01631																0.25	0.0531801	1.24081	2.3094	3.22371	4	5.19615	6	6.75	6	6.28158	6.49519	6.6489	6.75	6.80505	6.81995	6.80001	6.75
0.26	5.07645	6.22849	6.96434	7.3214	7.42877	7.23825	6.79698	4.633																0.26	0.0518188	1.20515	2.23553	3.11014	3.84615	4.96288	5.69231	6.23422	5.69231	5.93949	6.12089	6.24475	6.31846	6.34865	6.34124	6.30152	6.23422
0.27	4.95472	6.05933	6.75218	7.07426	7.15363	6.92291	6.45679	4.28297																0.27	0.0505762	1.17242	2.16743	3.00515	3.7037	4.74667	5.40741	5.76321	5.40741	5.62305	5.77511	5.87197	5.92111	5.9292	5.90217	5.84528	5.76321
0.28	4.84346	5.90368	6.55609	6.84517	6.89814	6.62979	6.1409	3.9626																0.28	0.0494405	1.14231	2.10448	2.90784	3.57143	4.54569	5.14286	5.33211	5.14286	5.32954	5.45482	5.52722	5.55429	5.54273	5.49846	5.42672	5.33211
0.29	4.74164	5.76021	6.37444	6.63228	6.66028	6.35657	5.8468	3.66874																0.29	0.0484012	1.11455	2.04618	2.8174	3.44828	4.35835	4.89655	4.9367	4.89655	5.05659	5.15738	5.20759	5.21483	5.18581	5.12644	5.04189	4.9367
0.3	4.64841	5.62776	6.20582	6.43398	6.43827	6.10125	5.5723	3.3987																0.3	0.0474495	1.08892	1.99205	2.73316	3.33333	4.1833	4.66667	4.57333	4.66667	4.80213	4.88052	4.91058	4.9	4.85549	4.78291	4.68737	4.57333
0.31	4.563	5.50531	6.049	6.24887	6.23058	5.86211	5.31551	3.15011																0.31	0.0465777	1.06523	1.94171	2.65453	3.22581	4.01933	4.45161	4.23883	4.45161	4.56438	4.62223	4.63401	4.60742	4.54917	4.46508	4.36018	4.23883
0.32	4.48476	5.39198	5.90289	6.07572	6.03587	5.63762	5.07478	2.9209																0.32	0.045779	1.0433	1.89481	2.58098	3.125	3.86541	4.25	3.9304	4.25	4.34179	4.3808	4.37596	4.335	4.2646	4.17052	4.05771	3.9304
0.33	4.41311	5.28701	5.76658	5.91347	5.85297	5.42644	4.84863	2.70926																0.33	0.0450476	1.02299	1.85105	2.51205	3.0303	3.72061	4.06061	3.64561	4.06061	4.13297	4.15469	4.13475	4.08091	3.99979	3.8971	3.77766	3.64561
0.34	4.34756	5.18971	5.63921	5.76117	5.68082	5.22738	4.63578	2.51358																0.34	0.0443785	1.00416	1.81017	2.44735	2.94118	3.58413	3.88235	3.38231	3.88235	3.93671	3.94255	3.90891	3.84353	3.753	3.64291	3.51802	3.38231
0.35	4.28766	5.09949	5.52007	5.61796	5.51851	5.03941	4.4351	2.33245																0.35	0.0437671	0.986704	1.77192	2.38652	2.85714	3.45525	3.71429	3.13857	3.71429	3.75194	3.74319	3.69712	3.62143	3.52266	3.4063	3.27699	3.13857
0.36	4.23304	5.01583	5.4085	5.48312	5.36522	4.8616	4.24556	2.1646																0.36	0.0432095	0.970516	1.73611	2.32924	2.77778	3.33333	3.55556	2.91271	3.55556	3.57771	3.55556	3.4982	3.41333	3.30739	3.18578	3.05298	2.91271
0.37	4.18335	4.93825	5.30393	5.35597	5.22022	4.6931	4.06627	2.00891																0.37	0.0427023	0.955505	1.70254	2.27523	2.7027	3.21781	3.40541	2.70321	3.40541	3.41316	3.3787	3.31114	3.21811	3.10597	2.98001	2.84457	2.70321
0.38	4.13829	4.86634	5.20583	5.23593	5.08284	4.53319	3.89642	1.86437																0.38	0.0422424	0.941592	1.67105	2.22423	2.63158	3.10816	3.26316	2.50872	3.26316	3.25753	3.21177	3.13498	3.03474	2.9173	2.78781	2.65048	2.50872
0.39	4.09762	4.79975	5.11376	5.12246	4.95251	4.38119	3.73528	1.73008																0.39	0.0418272	0.928706	1.6415	2.17603	2.5641	3.00394	3.12821	2.32801	3.12821	3.11014	3.05401	2.9689	2.86231	2.74038	2.60812	2.46958	2.32801
0.4	4.06109	4.73813	5.02729	5.01508	4.8287	4.2365	3.58219	1.60522																0.4	0.0414544	0.916783	1.61374	2.13041	2.5	2.90474	3	2.16	3	2.97038	2.90474	2.81214	2.7	2.57433	2.43998	2.30084	2.16
0.41	4.02852	4.6812	4.94606	4.91336	4.71093	4.09858	3.43658	1.48906																0.41	0.0411219	0.905768	1.58767	2.0872	2.43902	2.81018	2.87805	2.0037	2.87805	2.83768	2.76334	2.66403	2.54707	2.41834	2.28252	2.14334	2.0037
0.42	3.99972	4.62871	4.86974	4.81692	4.59876	3.96694	3.29789	1.38094																0.42	0.0408279	0.895612	1.56317	2.04623	2.38095	2.71992	2.7619	1.85821	2.7619	2.71155	2.62926	2.52396	2.40286	2.27168	2.13496	1.99622	1.85821
0.43	3.97455	4.58042	4.79804	4.72539	4.49181	3.84114	3.16566	1.28026																0.43	0.040571	0.886269	1.54015	2.00735	2.32558	2.63366	2.65116	1.72273	2.65116	2.59154	2.50198	2.39136	2.26674	2.1337	1.99658	1.85874	1.72273
0.44	3.95288	4.53614	4.73067	4.63848	4.38973	3.72077	3.03944	1.18646																0.44	0.0403498	0.8777	1.51853	1.97043	2.27273	2.55113	2.54545	1.59651	2.54545	2.47722	2.38105	2.26573	2.13818	2.0038	1.86675	1.7302	1.59651
0.45	3.93461	4.49568	4.66741	4.55588	4.29218	3.60546	2.91883	1.09905																0.45	0.0401632	0.869872	1.49822	1.93534	2.22222	2.47207	2.44444	1.47889	2.44444	2.36823	2.26606	2.14662	2.01667	1.88142	1.74487	1.60996	1.47889
0.46	3.91963	4.45889	4.60802	4.47733	4.19887	3.49486	2.80346	1.01757																0.46	0.0400103	0.862754	1.47916	1.90198	2.17391	2.39624	2.34783	1.36925	2.34783	2.26421	2.15662	2.03359	1.90174	1.76608	1.6304	1.49746	1.36925
0.47	3.90789	4.42563	4.55233	4.40259	4.10953	3.38869	2.693	0.941608																0.47	0.0398905	0.856318	1.46128	1.87023	2.12766	2.32344	2.25532	1.26704	2.25532	2.16486	2.05237	1.92627	1.79298	1.65732	1.52286	1.39217	1.26704
0.48	3.89931	4.39578	4.50015	4.33145	4.02392	3.28664	2.58714	0.870782																0.48	0.039803	0.850543	1.44453	1.84001	2.08333	2.25347	2.16667	1.17173	2.16667	2.06988	1.95301	1.8243	1.69	1.55471	1.42179	1.2936	1.17173
0.49	3.89388	4.36925	4.45131	4.2637	3.9418	3.18846	2.4856	0.804739																0.49	0.0397475	0.845408	1.42886	1.81123	2.04082	2.18615	2.08163	1.08287	2.08163	1.97902	1.85823	1.72737	1.59245	1.45787	1.32678	1.2013	1.08287
0.5	3.89155	4.34593	4.4057	4.19916	3.86296	3.0939	2.38813	0.743157																0.5	0.0397237	0.840896	1.41421	1.78381	2	2.12132	2	1	2	1.89202	1.76777	1.63516	1.5	1.36646	1.23744	1.11488	1
0.51	3.89232	4.32577	4.36316	4.13767	3.78722	3.00275	2.29448	0.685738																0.51	0.0397316	0.836995	1.40056	1.75769	1.96078	2.05882	1.92157	0.922737	1.92157	1.80866	1.68137	1.54741	1.41235	1.28013	1.15342	1.03395	0.922737
0.52	3.89619	4.3087	4.3236	4.07907	3.71438	2.9148	2.20443	0.632209																0.52	0.0397711	0.833692	1.38786	1.7328	1.92308	1.99852	1.84615	0.850708	1.84615	1.72874	1.59882	1.46387	1.32923	1.1986	1.0744	0.958167	0.850708
0.53	3.90319	4.29468	4.28691	4.02323	3.6443	2.82986	2.11778	0.582315																0.53	0.0398426	0.83098	1.37608	1.70907	1.88679	1.94028	1.77358	0.78357	1.77358	1.65207	1.51989	1.38429	1.25038	1.12157	1.00008	0.887206	0.78357
0.54	3.91335	4.28369	4.25301	3.97001	3.57681	2.74775	2.03433	0.535822																0.54	0.0399462	0.828854	1.3652	1.68647	1.85185	1.88398	1.7037	0.721007	1.7037	1.57847	1.44439	1.30847	1.17556	1.0488	0.930184	0.82077	0.721007
0.55	3.92672	4.27571	4.22183	3.91931	3.51178	2.6683	1.95392	0.49251																0.55	0.0400827	0.827309	1.35519	1.66493	1.81818	1.82951	1.63636	0.662727	1.63636	1.50777	1.37213	1.23621	1.10455	0.980051	0.864444	0.758583	0.662727
0.56	3.94336	4.27074	4.19329	3.87101	3.44907	2.59137	1.87639	0.452179																0.56	0.0402526	0.826347	1.34603	1.64441	1.78571	1.77676	1.57143	0.608457	1.57143	1.43983	1.30296	1.16731	1.03714	0.91509	0.802623	0.700387	0.608457
0.57	3.96337	4.26878	4.16735	3.82502	3.38856	2.51681	1.80157	0.41464																0.57	0.0404568	0.825969	1.33771	1.62487	1.75439	1.72564	1.50877	0.557944	1.50877	1.3745	1.23671	1.10161	0.973158	0.853714	0.744499	0.645944	0.557944
0.58	3.98683	4.26988	4.14397	3.78125	3.33014	2.44449	1.72934	0.379717																0.58	0.0406963	0.826181	1.3302	1.60628	1.72414	1.67605	1.44828	0.510952	1.44828	1.31164	1.17324	1.03894	0.912414	0.795731	0.689864	0.59503	0.510952
0.59	4.01388	4.27406	4.12312	3.73962	3.27369	2.37428	1.65955	0.347248																0.59	0.0409725	0.82699	1.32351	1.5886	1.69492	1.62791	1.38983	0.467261	1.38983	1.25115	1.11241	0.979157	0.854746	0.74096	0.638522	0.547438	0.467261
0.6	4.04466	4.28138	4.10476	3.70006	3.21913	2.30606	1.59209	0.31708																0.6	0.0412866	0.828407	1.31762	1.57179	1.66667	1.58114	1.33333	0.426667	1.33333	1.19291	1.05409	0.922118	0.8	0.689235	0.590292	0.502973	0.426667
0.61	4.07933	4.29192	4.08891	3.66251	3.16636	2.23972	1.52684	0.289071																0.61	0.0416405	0.830447	1.31253	1.55584	1.63934	1.53566	1.27869	0.388977	1.27869	1.1368	0.998176	0.867693	0.748033	0.640396	0.545004	0.461455	0.388977
0.62	4.11809	4.30577	4.07555	3.62692	3.11529	2.17516	1.46369	0.263087																0.62	0.0420361	0.833126	1.30824	1.54072	1.6129	1.49139	1.22581	0.354013	1.22581	1.08273	0.944547	0.81576	0.69871	0.594299	0.502499	0.422712	0.354013
0.63	4.16114	4.32303	4.0647	3.59322	3.06584	2.11228	1.40255	0.239004																0.63	0.0424756	0.836466	1.30475	1.52641	1.5873	1.44828	1.1746	0.321606	1.1746	1.03061	0.893104	0.766205	0.651905	0.550803	0.462628	0.386585	0.321606
0.64	4.20875	4.34384	4.05638	3.56139	3.01794	2.05099	1.34332	0.216705																0.64	0.0429616	0.840491	1.30208	1.51288	1.5625	1.40625	1.125	0.2916	1.125	0.980349	0.84375	0.718923	0.6075	0.509781	0.42525	0.352926	0.2916
0.65	4.2612	4.36833	4.05063	3.53138	2.97151	1.99119	1.28592	0.196079																0.65	0.043497	0.845231	1.30024	1.50014	1.53846	1.36525	1.07692	0.263846	1.07692	0.931868	0.796395	0.673811	0.565385	0.471111	0.390234	0.321592	0.263846
0.66	4.31882	4.3967	4.04749	3.50317	2.92648	1.9328	1.23025	0.177024																0.66	0.0440851	0.85072	1.29923	1.48815	1.51515	1.32522	1.0303	0.238206	1.0303	0.88509	0.750956	0.630778	0.525455	0.434677	0.357455	0.292452	0.238206
0.67	4.38197	4.42915	4.04704	3.47674	2.88281	1.87574	1.17624	0.159444																0.67	0.0447297	0.856998	1.29909	1.47692	1.49254	1.2861	0.985075	0.214549	0.985075	0.839944	0.707353	0.589736	0.487612	0.400373	0.326797	0.265381	0.214549
0.68	4.45108	4.4659	4.04935	3.45206	2.84041	1.81994	1.12383	0.143246																0.68	0.0454352	0.864109	1.29983	1.46644	1.47059	1.24784	0.941176	0.192753	0.941176	0.796363	0.665512	0.5506	0.451765	0.368097	0.298149	0.240262	0.192753
0.69	4.52664	4.50723	4.05452	3.42914	2.79925	1.76532	1.07293	0.128344																0.69	0.0462065	0.872107	1.30149	1.45671	1.44928	1.21038	0.898551	0.172701	0.898551	0.754285	0.625365	0.513294	0.417826	0.337752	0.271408	0.216984	0.172701
0.7	4.60919	4.55346	4.06266	3.40798	2.75926	1.7118	1.02348	0.114658																0.7	0.0470492	0.881051	1.3041	1.44771	1.42857	1.17369	0.857143	0.154286	0.857143	0.713651	0.586846	0.477746	0.385714	0.309249	0.246475	0.195441	0.154286
0.71	4.69938	4.60493	4.07392	3.38858	2.72039	1.65933	0.975433	0.102112																0.71	0.0479698	0.891011	1.30771	1.43947	1.40845	1.13771	0.816901	0.137403	0.816901	0.674406	0.549894	0.443885	0.355352	0.282501	0.223257	0.175536	0.137403
0.72	4.79793	4.66207	4.08844	3.37096	2.68261	1.60782	0.928717	0.0906321																0.72	0.0489757	0.902067	1.31238	1.43199	1.38889	1.1024	0.777778	0.121956	0.777778	0.636499	0.514452	0.411649	0.326667	0.257428	0.201665	0.157175	0.121956
0.73	4.90569	4.72536	4.10643	3.35515	2.64586	1.55722	0.883281	0.080151																0.73	0.0500757	0.914312	1.31815	1.42527	1.36986	1.0677	0.739726	0.107852	0.739726	0.59988	0.480466	0.380975	0.299589	0.233953	0.181616	0.140268	0.107852
0.74	5.02363	4.79533	4.12811	3.34118	2.61011	1.50746	0.839073	0.0706039																0.74	0.0512796	0.927851	1.32511	1.41934	1.35135	1.03359	0.702703	0.0950054	0.702703	0.564505	0.447887	0.351807	0.274054	0.212003	0.163031	0.124732	0.0950054
0.75	5.15289	4.87264	4.15373	3.32912	2.57531	1.45848	0.796043	0.0619297																0.75	0.0525991	0.942809	1.33333	1.41421	1.33333	1	0.666667	0.0833333	0.666667	0.53033	0.416667	0.324091	0.25	0.191508	0.145833	0.110485	0.0833333
0.76	5.29481	4.95802	4.1836	3.31901	2.54142	1.41021	0.754146	0.0540705																0.76	0.0540477	0.95933	1.34292	1.40992	1.31579	0.966904	0.631579	0.0727579	0.631579	0.497317	0.386762	0.297775	0.227368	0.172403	0.129952	0.0974538	0.0727579
0.77	5.45094	5.05235	4.21808	3.31095	2.50842	1.36259	0.713337	0.0469714																0.77	0.0556415	0.977582	1.35399	1.4065	1.2987	0.934253	0.597403	0.0632052	0.597403	0.465427	0.35813	0.272813	0.206104	0.154625	0.115318	0.0855642	0.0632052
0.78	5.62315	5.15666	4.25759	3.30503	2.47626	1.31555	0.673575	0.0405802																0.78	0.0573993	0.997765	1.36667	1.40398	1.28205	0.902003	0.564103	0.0546051	0.564103	0.434627	0.330734	0.24916	0.186154	0.138115	0.101866	0.0747479	0.0546051
0.79	5.81365	5.27216	4.30262	3.30136	2.44491	1.26904	0.634819	0.0348475																0.79	0.0593439	1.02011	1.38113	1.40242	1.26582	0.870109	0.531646	0.0468911	0.531646	0.404883	0.304538	0.226772	0.167468	0.122815	0.0895342	0.0649392	0.0468911
0.8	6.02508	5.4003	4.35376	3.30011	2.41435	1.22297	0.597032	0.0297263																0.8	0.0615022	1.04491	1.39754	1.40189	1.25	0.838525	0.5	0.04	0.5	0.376166	0.279508	0.20561	0.15	0.10867	0.0782624	0.0560756	0.04
0.81	6.26068	5.54281	4.41172	3.30143	2.38454	1.17729	0.560179	0.0251719																0.81	0.0639071	1.07248	1.41615	1.40245	1.23457	0.807204	0.469136	0.0338716	0.469136	0.348449	0.255614	0.185638	0.133704	0.09563	0.0679934	0.0480971	0.0338716
0.82	6.52438	5.7018	4.47733	3.30555	2.35546	1.13191	0.524224	0.0211419																0.82	0.0665988	1.10324	1.43721	1.4042	1.21951	0.776093	0.439024	0.0284488	0.439024	0.321706	0.232828	0.166819	0.118537	0.0836436	0.0586726	0.0409465	0.0284488
0.83	6.82103	5.87984	4.55163	3.31272	2.32708	1.08677	0.489135	0.0175958																0.83	0.069627	1.13769	1.46106	1.40725	1.20482	0.74514	0.409639	0.0236771	0.409639	0.295914	0.211123	0.149121	0.104458	0.0726633	0.0502472	0.0345691	0.0236771
0.84	7.15673	6.0801	4.63586	3.32327	2.29938	1.04177	0.454882	0.0144951																0.84	0.0730537	1.17644	1.4881	1.41173	1.19048	0.714286	0.380952	0.0195048	0.380952	0.271052	0.190476	0.132514	0.0914286	0.0626432	0.0426667	0.0289123	0.0195048
0.85	7.53917	6.30656	4.73157	3.33759	2.27233	0.996823	0.421435	0.0118031																0.85	0.0769575	1.22026	1.51882	1.41781	1.17647	0.683468	0.352941	0.0158824	0.352941	0.247103	0.170867	0.11697	0.0794118	0.0535389	0.0358821	0.0239256	0.0158824
0.86	7.97825	6.56426	4.84069	3.35618	2.24591	0.951825	0.388765	0.00948475																0.86	0.0814394	1.27012	1.55384	1.42571	1.16279	0.652615	0.325581	0.0127628	0.325581	0.22405	0.152277	0.102461	0.0683721	0.0453078	0.0298462	0.0195607	0.0127628
0.87	8.48691	6.85967	4.96568	3.37964	2.22009	0.906659	0.356847	0.00750674																0.87	0.0866317	1.32728	1.59397	1.43568	1.14943	0.621647	0.298851	0.0101011	0.298851	0.20188	0.13469	0.088964	0.0582759	0.0379085	0.0245136	0.0157709	0.0101011
0.88	9.0824	7.20131	5.10971	3.40877	2.19486	0.861191	0.325654	0.00583716																0.88	0.0927103	1.39339	1.6402	1.44805	1.13636	0.590472	0.272727	0.00785455	0.272727	0.180583	0.118094	0.076457	0.0490909	0.031301	0.0198399	0.0125111	0.00785455
0.89	9.78823	7.60056	5.27695	3.44459	2.1702	0.815263	0.295162	0.00444558																0.89	0.0999151	1.47064	1.69388	1.46327	1.1236	0.558982	0.247191	0.00598202	0.247191	0.160152	0.10248	0.0649202	0.0407865	0.0254464	0.0157819	0.00973803	0.00598202
0.9	10.6373	8.07305	5.47302	3.48845	2.14609	0.768686	0.265348	0.00330292																0.9	0.108582	1.56206	1.75682	1.4819	1.11111	0.527046	0.222222	0.00444444	0.222222	0.140585	0.087841	0.0543363	0.0333333	0.0203068	0.0122977	0.0074095	0.00444444
0.91	11.677	8.64086	5.70567	3.5422	2.12251	0.721226	0.236189	0.00238137																0.91	0.119195	1.67192	1.8315	1.50473	1.0989	0.494505	0.197802	0.0032044	0.197802	0.121883	0.0741758	0.0446905	0.0267033	0.0158448	0.00934615	0.00548475	0.0032044
0.92	12.9785	9.3363	5.986	3.6084	2.09943	0.672587	0.207663	0.00165433																0.92	0.132481	1.80649	1.92149	1.53285	1.08696	0.461157	0.173913	0.00222609	0.173913	0.104054	0.0614875	0.035971	0.0208696	0.012024	0.00688661	0.00392411	0.00222609
0.93	14.6535	10.2088	6.33049	3.69078	2.07686	0.622383	0.179752	0.00109636																0.93	0.149579	1.9753	2.03207	1.56785	1.07527	0.426734	0.150538	0.00147527	0.150538	0.0871108	0.0497856	0.028169	0.0158065	0.00880787	0.00487899	0.00268886	0.00147527
0.94	16.8879	11.3381	6.76497	3.79498	2.05477	0.570084	0.152434	0.000683072																0.94	0.172386	2.19381	2.17153	1.61211	1.06383	0.390876	0.12766	0.000919149	0.12766	0.0710794	0.0390876	0.0212799	0.0114894	0.00616021	0.00328336	0.00174108	0.000919149
0.95	20.0156	12.8626	7.33265	3.93015	2.03314	0.514935	0.125691	0.000391135																0.95	0.204313	2.48879	2.35376	1.66953	1.05263	0.353063	0.105263	0.000526316	0.105263	0.0559979	0.0294219	0.0153041	0.00789474	0.00404429	0.00205954	0.00104346	0.000526316
0.96	24.7037	15.0475	8.11275	4.11234	2.01196	0.455775	0.0995054	0.000198175																0.96	0.252168	2.91155	2.60417	1.74693	1.04167	0.3125	0.0833333	0.000266667	0.0833333	0.0419263	0.0208333	0.0102486	0.005	0.00242241	0.00116667	0.000559017	0.000266667
0.97	32.5051	18.4785	9.27122	4.37344	1.99122	0.390643	0.0738597	8.27432e-05																0.97	0.331801	3.57542	2.97603	1.85784	1.03093	0.267843	0.0618557	0.00011134	0.0618557	0.0289609	0.0133921	0.00613088	0.00278351	0.00125497	0.00056247	0.000250809	0.00011134
0.98	48.0648	24.7903	11.239	4.79062	1.9709	0.315704	0.0487373	2.42663e-05																0.98	0.49063	4.79669	3.60769	2.03506	1.02041	0.216461	0.0408163	3.26531e-05	0.0408163	0.0172681	0.00721538	0.00298476	0.00122449	0.000498856	0.000202031	8.14025e-05	3.26531e-05
0.99	94.5013	41.271	15.7338	5.63949	1.95099	0.220982	0.0241225	3.00265e-06																0.99	0.964639	7.98555	5.05051	2.39566	1.0101	0.151515	0.020202	4.0404e-06	0.020202	0.00718699	0.00252525	0.00087841	0.00030303	0.000103812	3.53535e-05	1.19783e-05	4.0404e-06
1																								1
																									10.2077	193.491	320.997	424.801	517.738	685.646	837.476	1345.61	837.476	908.746	977.378	1043.63	1107.71	1169.81	1230.07	1288.64	1345.61
0.4	90	85	80	75	70	65	60	55
0.6	90	85	80	75	70	65	60	55
